# Supplementary material for: Cancer Aging Research Group (CARG) score in older adults undergoing curative intent chemotherapy: a prospective cohort study
Source: PubMed Central journal article supplement — BMJ Open. 2021 Jun 29;11(6):e047376. doi: 10.1136/bmjopen-2020-047376 (PMC8245449; doi:10.1136/bmjopen-2020-047376), 2021-06-29
Supplement: bmjopen-2020-047376.draft_revisions.pdf [file bmjopen-2020-047376.draft_revisions.pdf]

# BMJ Open

BMJ Open is committed to open peer review. As part of this commitment we make the peer review history of every article we publish publicly available.

When an article is published we post the peer reviewers' comments and the authors' responses online. We also post the versions of the paper that were used during peer review. These are the versions that the peer review comments apply to.

The versions of the paper that follow are the versions that were submitted during the peer review process. They are not the versions of record or the final published versions. They should not be cited or distributed as the published version of this manuscript.

BMJ Open is an open access journal and the full, final, typeset and author-corrected version of record of the manuscript is available on our site with no access controls, subscription charges or pay-per-view fees (<http://bmjopen.bmj.com>).

If you have any questions on BMJ Open's open peer review process please email [info.bmjopen@bmj.com](mailto:info.bmjopen@bmj.com)

# BMJ Open

## Prospective validation of the Cancer Ageing Research Group (CARG) score in geriatric patients undergoing curative intent chemotherapy: A simple assay to predict clinically relevant toxicity in the elderly

|                               |                                                                                                                                                                                                                                                                                                                                                                                                                                                                                                                                                                                                                                                                                                                                                                                                                                                                                                                                                                                                                                                                                                                                                                                                                                                                                                                                  |
|-------------------------------|----------------------------------------------------------------------------------------------------------------------------------------------------------------------------------------------------------------------------------------------------------------------------------------------------------------------------------------------------------------------------------------------------------------------------------------------------------------------------------------------------------------------------------------------------------------------------------------------------------------------------------------------------------------------------------------------------------------------------------------------------------------------------------------------------------------------------------------------------------------------------------------------------------------------------------------------------------------------------------------------------------------------------------------------------------------------------------------------------------------------------------------------------------------------------------------------------------------------------------------------------------------------------------------------------------------------------------|
| Journal:                      | <i>BMJ Open</i>                                                                                                                                                                                                                                                                                                                                                                                                                                                                                                                                                                                                                                                                                                                                                                                                                                                                                                                                                                                                                                                                                                                                                                                                                                                                                                                  |
| Manuscript ID                 | bmjopen-2020-047376                                                                                                                                                                                                                                                                                                                                                                                                                                                                                                                                                                                                                                                                                                                                                                                                                                                                                                                                                                                                                                                                                                                                                                                                                                                                                                              |
| Article Type:                 | Original research                                                                                                                                                                                                                                                                                                                                                                                                                                                                                                                                                                                                                                                                                                                                                                                                                                                                                                                                                                                                                                                                                                                                                                                                                                                                                                                |
| Date Submitted by the Author: | 30-Nov-2020                                                                                                                                                                                                                                                                                                                                                                                                                                                                                                                                                                                                                                                                                                                                                                                                                                                                                                                                                                                                                                                                                                                                                                                                                                                                                                                      |
| Complete List of Authors:     | Ostwal, Vikas; Tata Memorial Centre, Homi Bhabha National Institute, Mumbai, India., Medical Oncology<br>Ramaswamy, Anant; Tata Memorial Centre, Homi Bhabha National Institute, Mumbai, India., Department of medical Oncology<br>Bhargava, Prabhat; Tata Memorial Centre<br>Hatkhambkar, Tejaswee; Tata Memorial Centre, Homi Bhabha National Institute, Mumbai, India., Department of medical Oncology<br>Swami, Rohit; Narayana Multi speciality Hospital, Jaipur India. , Medical Oncology<br>Rastogi, Sameer; AIIMS New Delhi, India.<br>Mandavkar, Sarika; Tata Memorial Centre, Homi Bhabha National Institute, Mumbai, India., Department of medical Oncology<br>Ghosh, Jaya; Tata Memorial Centre, Homi Bhabha National Institute, Mumbai, India., Department of medical Oncology<br>Bajpai, Jyoti; Tata Memorial Centre, Homi Bhabha National Institute, Mumbai, India., Department of medical Oncology<br>Gulia, Seema; Tata Memorial Centre, Homi Bhabha National Institute, Mumbai, India., Department of medical Oncology<br>Srinivas, Sujay; Tata Memorial Centre, Homi Bhabha National Institute, Mumbai, India., Department of medical Oncology<br>Rath, Sushmita; Tata Memorial Centre<br>Gupta, Sudeep; Tata Memorial Centre, Homi Bhabha National Institute, Mumbai, India., Department of medical Oncology |
| Keywords:                     | CHEMOTHERAPY, Adult oncology < ONCOLOGY, Gynaecological oncology < ONCOLOGY, Gastrointestinal tumours < ONCOLOGY, Breast tumours < ONCOLOGY, Adverse events < THERAPEUTICS                                                                                                                                                                                                                                                                                                                                                                                                                                                                                                                                                                                                                                                                                                                                                                                                                                                                                                                                                                                                                                                                                                                                                       |

SCHOLARONE™  
Manuscripts

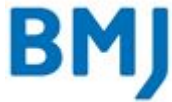

I, the Submitting Author has the right to grant and does grant on behalf of all authors of the Work (as defined in the below author licence), an exclusive licence and/or a non-exclusive licence for contributions from authors who are: i) UK Crown employees; ii) where BMJ has agreed a CC-BY licence shall apply, and/or iii) in accordance with the terms applicable for US Federal Government officers or employees acting as part of their official duties; on a worldwide, perpetual, irrevocable, royalty-free basis to BMJ Publishing Group Ltd ("BMJ") its licensees and where the relevant Journal is co-owned by BMJ to the co-owners of the Journal, to publish the Work in this journal and any other BMJ products and to exploit all rights, as set out in our [licence](#).

The Submitting Author accepts and understands that any supply made under these terms is made by BMJ to the Submitting Author unless you are acting as an employee on behalf of your employer or a postgraduate student of an affiliated institution which is paying any applicable article publishing charge ("APC") for Open Access articles. Where the Submitting Author wishes to make the Work available on an Open Access basis (and intends to pay the relevant APC), the terms of reuse of such Open Access shall be governed by a Creative Commons licence – details of these licences and which [Creative Commons](#) licence will apply to this Work are set out in our licence referred to above.

Other than as permitted in any relevant BMJ Author's Self Archiving Policies, I confirm this Work has not been accepted for publication elsewhere, is not being considered for publication elsewhere and does not duplicate material already published. I confirm all authors consent to publication of this Work and authorise the granting of this licence.

1  
2  
3  
4  
5  
6  
7  
8  
9  
10  
11  
12  
13  
14  
15  
16  
17  
18  
19  
20  
21  
22  
23  
24  
25  
26  
27  
28  
29  
30  
31  
32  
33  
34  
35  
36  
37  
38  
39  
40  
41  
42  
43  
44  
45  
46  
47  
48  
49  
50  
51  
52  
53  
54  
55  
56  
57  
58  
59  
60

# Title – Prospective validation of the Cancer Ageing Research Group (CARG) score in geriatric patients undergoing curative intent chemotherapy: A simple assay to predict clinically relevant toxicity in the elderly

---

## TITLE PAGE

**Running title** –CARG score in older Indian cancer patients undergoing curative-intent chemotherapy

### Authors

1. Dr. Vikas Ostwal

Professor, Department of Medical Oncology,

Tata Memorial Centre, Homi Bhabha National Institute, Mumbai, India.

Email: dr.vikas.ostwal@gmail.com

2. Dr. Anant Ramaswamy

Associate Professor, Department of Medical Oncology,

Tata Memorial Centre, Homi Bhabha National Institute, Mumbai, India.

Email: anantr13@gmail.com

1  
2  
3 3. Dr Prabhat Bhargava  
4

5  
6 Assistant Professor, Department of Medical Oncology,  
7

8  
9 Tata Memorial Centre, Homi Bhabha National Institute, Mumbai, India.

10  
11 Email: [bhargava611@gmail.com](mailto:bhargava611@gmail.com)  
12  
13

14  
15  
16  
17 4. Ms. Tejaswee Hatkhambkar  
18

19  
20 Research coordinator, Department of Medical Oncology,  
21

22  
23 Tata Memorial Centre, Homi Bhabha National Institute, Mumbai, India.  
24

25  
26 Email: [tejasweehatkambkar@gmail.com](mailto:tejasweehatkambkar@gmail.com)  
27  
28

29  
30  
31 5. Dr Rohit Swami  
32

33  
34 Assistant Professor, Department of Medical Oncology,  
35

36  
37 Narayana Multi speciality Hospital, Jaipur India.  
38

39  
40 Email: [swamirohit21@yahoo.in](mailto:swamirohit21@yahoo.in)  
41  
42

43  
44  
45 6. Dr Sameer Rastogi  
46

47  
48 Associate Professor, Department of Medical Oncology,  
49

50  
51 AIIMS New Delhi, India.  
52

53  
54 Email: [samdoc\\_mamc@yahoo.com](mailto:samdoc_mamc@yahoo.com)  
55  
56

57  
58 7. Ms. Sarika Mandavkar  
59  
60

1  
2  
3 Research nurse, Department of Medical Oncology,  
4

5  
6 Tata Memorial Centre, Homi Bhabha National Institute, Mumbai, India.  
7

8  
9 Email: [sarikamandavkar1@gmail.com](mailto:sarikamandavkar1@gmail.com)  
10

11  
12  
13  
14 8. Dr. Jaya Ghosh  
15

16  
17 Professor, Department of Medical Oncology,  
18

19  
20 Tata Memorial Centre, Homi Bhabha National Institute, Mumbai, India.  
21

22  
23 Email: [archana\\_jaya\\_ghosh@yahoo.co.in](mailto:archana_jaya_ghosh@yahoo.co.in)  
24

25  
26  
27  
28 9. Dr. Jyoti Bajpai  
29

30  
31 Professor, Department of Medical Oncology,  
32

33  
34 Tata Memorial Centre, Homi Bhabha National Institute, Mumbai, India.  
35

36  
37 Email: [dr\\_jyotibajpai@yahoo.co.in](mailto:dr_jyotibajpai@yahoo.co.in)  
38

39  
40  
41  
42 10. Dr. Seema Gulia  
43

44  
45 Professor, Department of Medical Oncology,  
46

47  
48 Tata Memorial Centre, Homi Bhabha National Institute, Mumbai, India.  
49

50  
51 Email: [drseemagulia@gmail.com](mailto:drseemagulia@gmail.com)  
52

53  
54  
55  
56 11. Dr Sujay Srinivas  
57

58  
59 Assistant Professor, Department of Medical Oncology,  
60

1  
2  
3 Tata Memorial Centre, Homi Bhabha National Institute, Mumbai, India.  
4  
5

6 Email: [sujay.0541@gmail.com](mailto:sujay.0541@gmail.com)  
7  
8  
9

10  
11 12. Dr Sushmita Rath  
12

13  
14 Assistant Professor, Department of Medical Oncology,  
15

16  
17 Tata Memorial Centre, Homi Bhabha National Institute, Mumbai, India.  
18

19  
20 Email: [sushmitarath73@gmail.com](mailto:sushmitarath73@gmail.com)  
21  
22  
23

24  
25 13. Dr Sudeep Gupta  
26

27  
28 Professor, Department of Medical Oncology,  
29

30  
31 Director ACTREC, Room 309/310, 3rd Floor, Paymaster Shodhika,  
32

33 ACTREC (Advanced Centre for Treatment, Research and Education in Cancer), Homi Bhabha  
34

35 National Institute (HBNI), Navi Mumbai - 410210, Maharashtra, India  
36

37  
38 Email id - [sudeepgupta04@yahoo.com](mailto:sudeepgupta04@yahoo.com)  
39  
40  
41  
42

43 Corresponding author  
44

45  
46 Dr. Anant Ramaswamy  
47

48  
49 Associate Professor, Department of Medical Oncology,  
50

51  
52 Tata Memorial Centre, Homi Bhabha National Institute, Mumbai, India.  
53

54  
55 Email: [anantr13@gmail.com](mailto:anantr13@gmail.com)  
56  
57  
58  
59  
60

1  
2  
3 Funding:

4  
5  
6 Received grants to Tata Memorial centre, Mumbai for the conduct of present study from

- 7  
8  
9 a. Indian Association of Supportive Care in Cancer awarded research award during BEST OF  
10  
11 MASCC 2019. **Grant number: 1716-A**  
12  
13  
14 b. Intas pharmaceuticals private limited **Grant number: 1716-B**  
15  
16

17  
18  
19 Prior presentation: None  
20

21  
22 Conflict of interest: None  
23

24  
25 Author Contributions:

26  
27 Conceptualization – Dr Vikas Ostwal , Dr Sudeep Gupta, Dr Sameer Rastogi, Dr Rohit Swami  
28

29  
30 Data curation – Dr Vikas Ostwal, Dr Anant Ramaswamy, Dr Prabhat Bhargava  
31

32  
33 Formal analysis – Dr Vikas Ostwal, Dr Anant Ramaswamy, Dr Prabhat Bhargava  
34

35  
36 Investigations - All authors  
37

38  
39 Project administration – All authors  
40

41  
42 Writing (original draft, review and editing) - All authors  
43

44  
45 Acknowledgements: Nil  
46

47  
48 Clinical trial registration: CTRI/2016/10/007357  
49

50  
51 Ethics committee Clearance: IEC/1019/1716/001  
52

53  
54 Word count: 2324  
55  
56  
57  
58  
59  
60



**Abstract:****Importance:**

The Cancer Aging Research Group (CARG) toxicity score is used to assess toxicity risk in geriatric patients receiving chemotherapy.

**Objective:**

The primary aim was to validate the CARG score in geriatric patients treated with curative intent chemotherapy in predicting Grade 3-5 toxicities.

**Design:**

This was a longitudinal prospective observational study

**Setting:**

Tata Memorial Hospital, Mumbai, India, a tertiary cancer care referral centre.

**Participants:**

Patients age  $\geq 65$  with gastrointestinal, breast or gynaecological stage I-III cancers being planned for curative intent chemotherapy. A total of 270 patients were required for accrual in the study.

**Exposure(s):**

Total risk score ranged from 0 (lowest toxicity risk) to 19 (highest toxicity risk).

**Main Outcome(s) and Measure(s):**

The primary endpoint of the study was to evaluate whether the CARG risk score predicted for grade 3-5 toxicities.

**Results:**

The study cohort of 270 patients had a mean age of 69 years (65-83), with the most common cancers being gastrointestinal (79%). Fifty-two percent of patients had at-least one grade 3-5 toxicity. The risk of toxicity was increased with increasing risk score (42% low, 51% medium, 79% high risk;  $P < .001$ ). There was no association between either ECOG PS ( $p=0.69$ ) or age adjusted Charlson Comorbidity Index ( $p=0.79$ ) risk categories and grade 3-5 chemotherapy toxicity.

**Conclusions and Relevance:**

The current study validates the CARG risk score in predicting for grade 3-5 toxicities in geriatric oncology patients receiving curative intent chemotherapy and can be considered as standard of care before planning chemotherapy in every elderly patient.

**Key words** – CARG risk; Hurria score, curative, ECOG PS, Charlson Comorbidity Index, chemotoxicity

1  
2  
3  
4  
5  
6  
7  
8 **Strengths and limitations of the study:**  
9

- 10 • The CARG risk score is a simple tool comprising easily available clinical information.
- 11
- 12 • This is a prospective study to assess CARG risk score in elderly patients treated with
- 13 curative intent to predict for grade 3-5 toxicities.
- 14
- 15 • CARG score performed better than traditional indices such as the age adjusted Charlson
- 16 Comorbidity Index and ECOG PS.
- 17
- 18 • The results suggest that the CARG score is valid in the studied population and can be
- 19 routinely used in clinical practice.
- 20
- 21 • This study does not include palliative patients and mainly GI cancer patients were
- 22 recruited.
- 23
- 24
- 25
- 26
- 27
- 28
- 29
- 30
- 31
- 32
- 33
- 34
- 35
- 36
- 37
- 38
- 39
- 40
- 41
- 42
- 43
- 44
- 45
- 46
- 47
- 48
- 49
- 50
- 51
- 52
- 53
- 54
- 55
- 56
- 57
- 58
- 59
- 60

## **Manuscript :**

### **Introduction**

Older adult patients ( age  $\geq 65$  years) with cancer represent a growing proportion of patients in community clinical practice, primarily due to increasing life-spans as well as medical progress contributing to decreased morbidity and mortality from other causes (1). Elderly patients comprise anywhere between 20% to 60% in community oncology practice, with variances based on access to cancer care, disease stage and centre specific management strategies (2,3).

The age adjusted Charlson Comorbidity Index (ACCI) and ECOG Performance status (PS) amongst others have often been used to quantify risks and predict for outcomes in older adults with cancer, but there is limited data for correlation between these indices and treatment related side effects (4–6). The Cancer Aging Research Group (CARG) risk score, developed by Hurria and colleagues, is an easy to use tool that predicts for significant chemotherapy related toxicities (grade 3- grade 5) in older North American adults  $\geq 65$  years starting on chemotherapy (7,8). Based on their training samples and subsequent validation studies, the investigators clearly identified low, mid and high-risk groups predicting for increasing rates of grade 3-5 toxicities (low risk: 30%, intermediate risk: 52%, high risk: 83%) with statistical significance ( $P < 0.001$ ). The CARG risk score has been studied validated in other countries and in specific tumor sites to varying degrees (9,10).

In older adults being treated with curative intent chemotherapy, there is the possibility of treating oncologists using standard doses to maximize outcomes, despite patient related indicators suggesting a requirement for lower doses. This is a unique scenario where further information on risks and benefits would allow for informed clinical decision making on doses and drugs to be used. As patients with all stages of cancer were included in the CARG

1  
2  
3 studies, the ambiguity with regard to its usage in patients being treated with potentially  
4  
5 curative intent lends itself to re-examination.  
6  
7

8 With this background, the investigators conductive a longitudinal prospective study with the  
9  
10 primary aim of validating the CARG risk score in Indian older cancer patients treated with  
11  
12 curative intent chemotherapy (neoadjuvant or/and adjuvant chemotherapy). Secondary and  
13  
14 exploratory objectives included correlation of the age adjusted Charlson Comorbidity Index  
15  
16 (ACCI) and physician measured ECOG PS with grade 3-5 toxicities as well as an estimation  
17  
18 of grade 1 and grade 2 toxicities and their correlation with the CARG risk score.  
19  
20  
21  
22

## 23 **Materials and methods**

### 24 **Patient selection and design**

25  
26  
27 The study was designed as a longitudinal prospective observational study to validate the  
28  
29 CARG risk score in predicting chemotherapy toxicity risk in elderly patients. The study was  
30  
31 conducted at the Tata Memorial Hospital and enrolled patients aged  $\geq 65$  years,  
32  
33 chemotherapy naïve, with a histological diagnosis of gastrointestinal, breast or  
34  
35 gynaecological cancer, stage I-III disease and planned for neoadjuvant or adjuvant systemic  
36  
37 chemotherapy as a potentially curative treatment option.  
38  
39  
40  
41  
42  
43

44 The study was designed by investigators from the Department of Medical Oncology of the Tata  
45  
46 Memorial Hospital and was approved by the ethics committee (IEC/1019/1716/001). The study  
47  
48 was registered at Clinical trial registry of India (CTRI/2016/10/007357). Written informed  
49  
50 consent was obtained from all patients before inclusion in the study.  
51  
52  
53

### 54 **Patient and public involvement:**

55  
56  
57 There was no public or patient involvement in design, conduct or results declaration of the  
58  
59 study.  
60

## Study procedures

Data regarding tumor type and stage, pre-treatment laboratory values, and chemotherapy regimen were recorded. All patients underwent standard pre-chemotherapy work up, including evaluation of end organ function. Patients were planned for chemotherapy by treating oncologist (with an assessment of ECOG PS and ACCI), who was blinded to the risk score. A study coordinator calculated the CARG risk score for patients enrolled in the study (7). Total risk score ranged from 0 (lowest toxicity risk) to 19 (highest toxicity risk), with division of the scores into low risk (0-5 points), intermediate risk (6 to 9 points) and high risk (10-19 points) as per the classification in the original study by Hurria et al (7). One modification of the original CARG risk score which was used in the current study was the measurement of 'Walking 1 block'. The concept of measuring distances by a block is not prevalent in India and hence, a distance of 100 metres in the immediate vicinity of the hospital was measured and patients were scored on their ability to walk the same. The chemotherapy dosing for the first cycle of chemotherapy was categorized as 'standard' if 100% doses were planned and 'dose reduced' if any dose below 100% was used. The decision for dose modifications was based on assessment by treating oncologist. Besides CARG risk score, the age adjusted Charlson's Comorbidity Index (ACCI) was calculated for all patients as part of standard assessment of older adults with cancer. A cut-off of 4 points ( $\leq 4$  and  $> 4$ ) was used to differentiate between low and high CCI scores (11). Patients were followed from beginning till the end of chemotherapy course. Toxicities were captured prospectively at all clinical visits (by treating oncologist and study coordinator) and graded as per National Cancer Institute Common Terminology Criteria for Adverse Events (NCI CTCAE), version 4.0. Decision on relatedness of toxicity to chemotherapy was made by treating physician. Blood values were captured as grade 1 to 5 toxicity if they met the criteria

1  
2  
3 on the date of scheduled chemotherapy or at the time the patient was seeking attention  
4  
5 because of chemotherapy related toxicities.  
6  
7

## 8 Outcomes

9  
10  
11 The primary outcome of the study was the occurrence of any grade 3-5 chemotherapy related  
12 toxicity over the course of planned treatment and its association with the CARG risk score.  
13

14  
15  
16 The planned secondary endpoints of the study were the correlation of ACCI and ECOG PS  
17 with grade 3-5 chemotherapy related toxicity. Occurrence of any grade 1-2 chemotherapy  
18 related toxicity and its correlation with CARG risk score was an exploratory aspect of the  
19 study.  
20  
21  
22  
23  
24  
25

## 26 Statistical analysis

27  
28  
29  
30  
31 Descriptive analyses were performed to enumerate patient, tumor, treatment characteristics,  
32 CARG risk scores and ACCI. The incidence of grade 3 to grade 5 toxicities were calculated  
33 and compared between CARG risk groups, and ECOG PS cohorts by using the chi-square  
34 test. Sample size was calculated based on cumulative incidence of 20 % of grade 3-grade 5  
35 toxicities in elderly patients with ECOG PS 0/1 and controlled or absent comorbidities as  
36 opposed to 36% in elderly patients with ECOG PS 2 with or without multiple uncontrolled  
37 comorbidities among patients receiving perioperative chemotherapy at Tata Memorial center  
38 for breast, gastrointestinal and gynaecological cancers. A power of 80% and alpha of 5% with  
39 1 sided assumption was required with estimated sample size required being 246 patients.  
40  
41  
42 Assuming an attrition rate of 10%, a total of 270 patients were required for enrolment in the  
43 study. Chi square test was performed to test the association of the CARG risk score, PS, and  
44 ACCI with G 3-5 toxicities and for association of CARG risk score with grade 1-2 toxicities.  
45  
46  
47 The predictive ability of the CARG risk score was evaluated by calculating receiver-  
48  
49  
50  
51  
52  
53  
54  
55  
56  
57  
58  
59  
60

operating characteristic (ROC) curves and calculating the area under the curve (also known as C-statistic). ROC curves were also calculated for ECOG PS and ACCI. All analyses were performed using SPSS version 25. All tests were two-sided, and a P value of <0.05 was considered statistically significant.

## Results

### Patient and treatment characteristics

The study completed accrual of 270 patients, with mean age of patients being 69 years (range:65-83), 121 (45%) female patients and 212 patients (79%) having gastrointestinal cancers. For purposes of comparison, data from the seminal CARG study by Hurria et al is provided for comparison (table 1)

### Chemotherapy toxicity

At least one grade 3 to 5 toxicity was seen in 140 patients (52%), with 119 (44%) having grade 3, 22 (8%) having grade 4, and 11(4%) grade 5 toxicities. Grade 3-5 haematological and non-haematological toxicities occurred in 60 patients (22%) and 120 (45%) patients respectively. Common haematological toxicities were neutropenia in 26 (10%) and febrile neutropenia in 17 (6%) patients, while common non-haematological toxicities were infections, fatigue and diarrhoea in 54 (20%), 24 (9%) and 23 (9%) patients respectively (table 2).

The incidence of grade 1 to grade 2 toxicities are listed in supplementary table 2.

### CARG risk score and correlation with toxicity

The median overall CARG risk score was 6 (range, 0 to 19). Of the 270 patients, 72 (27%), 164 (61%) and 34 (13%) were classified as low, intermediate and high risk, respectively (table 1). Grade 3-5 toxicities were seen in 30(42%), 83 (51%) and 27 (79%) patients with



1  
2  
3 low, intermediate and high-risk score. There was a significant difference in toxicity amongst  
4 the risk groups ( $p<0.001$ ) (figure 1 and table 2). The odds of a patient classified as low risk  
5 having a grade 3-5 toxicity as compared to patient with intermediate risk was 0.61 (95% CI:  
6 0.47-0.81), while the odds of a patient classified as high risk having a grade 3-5 toxicity as  
7 compared to patient with intermediate risk was 3.31 (95% CI:1.58-6.94). Area under the  
8 ROC curve for the predictive model in the current cohort was 0.63 (95% CI: 0.57-0.7). The  
9 correlation of individual components of the CARG risk score with grade 3-5 toxicities is  
10 enumerated in supplementary table 1.  
11  
12  
13  
14  
15  
16  
17  
18  
19  
20  
21

22 Grade 1-2 toxicities were seen in 61(86%), 144(88%) and 29 (85%) patients with low,  
23 intermediate and high-risk score. There was no significant difference in toxicity amongst the  
24 CARG risk groups ( $p=0.79$ ).  
25  
26  
27  
28  
29

### 30 Association of grade 3-5 toxicity with Age adjusted Charlson 31 Comorbidity Index (ACCI) and ECOG PS 32 33

34 The median ACCI was 5. A CCI $\leq$ 4 was seen in 111 patients (41%), while 159 patients  
35 (59%) had a CCI $\geq$ 4. There was no significant difference in toxicities amongst both groups  
36 of patients ( $p=0.7$ ) (figure 1 and table 3). The ROC of the model with CCI (as a continuous  
37 variable) was 0.48 (95% CI: 0.41-0.55), which was lower than the ROC of the CARG risk  
38 score model, 0.63.  
39  
40  
41  
42  
43  
44  
45  
46

47 ECOG PS was 0, 1 and 2 in 9(3%), 221(82%) and 40 (15%) patients, respectively. There was  
48 no significant difference in toxicities amongst both groups of patients ( $p=0.69$ ) (figure 1 and  
49 table 3). The ROC of the model with ECOG PS (as a continuous variable) was 0.52 (95% CI:  
50 0.45-0.59), which was lower than the ROC of the CARG risk score model, 0.63.  
51  
52  
53  
54  
55  
56

## 57 Discussion 58 59 60

1  
2  
3 This study validates the CARG risk score in older Indian patients receiving curative-intent  
4 chemotherapy for stage I-III gastrointestinal, breast and gynaecological cancers, though the  
5 association between rates of severe chemotherapy toxicity and CARG risk groups as being  
6 discriminatory was modest (AU-ROC 0.63). No association was found between ECOG PS  
7 and burden of comorbidities as measured by the ACCI with severe chemotherapy related  
8 toxicities.  
9

10  
11  
12 There is a significant knowledge gap in terms of how older patients in general and older  
13 patients with cancer fare in the Indian scenario. Limited data suggests no defined care  
14 structure for older patients with cancer in India as well as only low-moderate awareness and  
15 use of geriatric assessment in older patients with cancer (3,12) . Available evidence from  
16 India suggests that 98% of older adult cancer patients have vulnerabilities in at least one  
17 geriatric domain, though the specific vulnerabilities appear to differ from previously  
18 published data (13). Such a high and differential vulnerability profile in these patients  
19 suggests that they may have a different incidence of toxicities with standard chemotherapy  
20 regimens. With such a background, it was essential to evaluate the validity of the CARG risk  
21 score before routine advocacy in older adult patients.  
22  
23  
24  
25  
26  
27  
28  
29  
30  
31  
32  
33  
34  
35  
36  
37  
38  
39

40  
41 There are some important differences between the populations of the current study and the  
42 seminal CARG study. The current study had only patients with stage I-III disease, while the  
43 CARG study had 38% with non-metastatic disease. Other relevant differences between the  
44 cohorts include a younger mean age (69 vs. 73 years), lesser comorbidities (46% with no  
45 comorbidities vs. 10% with no comorbidities), and better performance on a number of  
46 individual variables in the CARG risk score (better hearing, lesser number of falls, better  
47 social activity and effort tolerance). There were also a lower proportion of patients with high  
48 risk score in the current study (13% vs. 22%). These differences indicate that patients in the  
49  
50  
51  
52  
53  
54  
55  
56  
57  
58  
59  
60

1  
2  
3 current study were a well preserved and presumably fitter group of patients with lesser  
4  
5 disease burden and potential for toxicities.  
6  
7

8  
9 Despite the differences in patient cohorts in terms of baseline characteristics, the current  
10  
11 study validated the Cancer Aging Research Group (CARG) risk score in predicting grade 3  
12  
13 to grade 5 chemotherapy related toxicities. The low, intermediate and high risk CARG groups  
14  
15 predicted for increasing incidences of grade 3-5 toxicities with statistical significance. The  
16  
17 odds ratios between individual risk groups for predicting grade 3-5 toxicity was also  
18  
19 statistically significant, highlighting the differential capability of the risk score. An  
20  
21 unanswered component of the CARG risk assessment was whether it correlated with grade 1-  
22  
23 2 toxicities. Previous studies by Moth et al estimating grade 1 and grade 2 toxicities as  
24  
25 toxicity burden have not shown a correlation with the CARG risk score (14). This is possibly  
26  
27 due to the near universal occurrence of such toxicities in patients receiving chemotherapy. A  
28  
29 similar trend was seen in the current study wherein an increasing risk score did not predict for  
30  
31 an increased risk of grade 1-2 toxicities. Additionally, in comparison to the predictive  
32  
33 capacity of the CARG risk score, the Charlson Comorbidity Index and ECOG PS based risk  
34  
35 groups did not predict for incidences of toxicity in the study. These results highlight certain  
36  
37 salient points in the study, Firstly, the CARG risk score can be used with confidence in the  
38  
39 Indian population to predict for grade 3-5 toxicity. The CARG risk score was evaluated only  
40  
41 in a North American elderly adult cohort initially and the current study provides validation  
42  
43 for the score in the Indian context. Secondly, despite being a better-preserved cohort in  
44  
45 comparison to the population in the seminal study as well as having only patients on curative  
46  
47 intent therapy, a high proportion of patients across risk groups developed grade 3-5 toxicity  
48  
49 which may be life-threatening. Thus, it is imperative to carefully assess the trade-off between  
50  
51 objectives such as survival and downstaging versus potentially life-threatening toxicities  
52  
53 while planning curative intent chemotherapy in older adult patients. Thirdly, the area under  
54  
55  
56  
57  
58  
59  
60

1  
2  
3 the ROC for the current study was 0.63 and is lower in comparison to the original study  
4 (0.72), though very similar to the results of the validation study (0.65) by the CARG group  
5  
6 (8). Though this indicates a modest discriminatory capability for the CARG risk score in the  
7  
8 current study, it is probably also reflective of the true value of the score in prediction of  
9  
10 severe chemotherapy related toxicities. Smaller studies by Australian investigators have also  
11  
12 previously commented on this lack of discriminatory value with the CARG risk score (14).  
13  
14 Finally, using a global assessment score such as ECOG PS or only one aspect of an  
15  
16 assessment profile such as comorbidity status (as in the case of ACCI) would not accurately  
17  
18 capture the heterogeneity of the older adult population. This is reflected in the inadequacy of  
19  
20 ECOG PS and ACCI in predicting for toxicities and hence, these indices should only be used  
21  
22 in conjunction with other indices as measures of assessment in older adults with cancer  
23  
24 (15,16).  
25  
26  
27  
28  
29

30  
31 Certain strengths of the current study need to be highlighted. The prospective collection of  
32  
33 toxicity data removes any recall bias that may lead to underestimation of the same. The  
34  
35 assessment in patients undergoing curative intent treatment only is novel and lays stress on  
36  
37 the conundrum faced by oncologists when balancing risks and benefits of using potentially  
38  
39 aggressive chemotherapy regimens in the neoadjuvant or adjuvant setting. The results will  
40  
41 allow patients and oncologists to discuss options with evidentiary basis for expected toxicities  
42  
43 when treatment regimens are considered. By validating the CARG risk score in an Indian  
44  
45 population, the study provides further evidence for the use of the score across geographical  
46  
47 regions.  
48  
49  
50

51  
52 There are certain limitations to this study. This is a single centre study and the results may not  
53  
54 be generalizable to practice across India. There is an under-representation of non-  
55  
56 gastrointestinal cancers and this may hamper the generalization of the study results to all  
57  
58 solid tumors. Additionally, other common solid tumors like lung cancers, head and neck  
59  
60

1  
2  
3 cancers and genitourinary cancers have not been evaluated in this study. The rate of grade 3-5  
4  
5 toxicities was much higher than planned as per baseline statistical considerations – this may  
6  
7 relate to the preponderance of GI cancers in the study population, besides other differences in  
8  
9 baseline characteristics of the patient cohorts as has been previously discussed. Additionally,  
10  
11 while information with regard to correlation of the CARG risk score with grade 1-2 toxicities  
12  
13 has been provided, the study was not statistically powered to provide an answer for the same.  
14  
15 We also do not have information on patient related outcomes in the study.  
16  
17  
18  
19

20  
21 Going forward, future directions with regard to the CARG risk assessment include  
22  
23 developing paradigms for the degree of dose modifications required in patients based on the  
24  
25 score. Patients preferences with regard to tumor related endpoints versus toxicity limiting  
26  
27 QOL based on toxicity risk assessment can be explored in trials, especially in the advanced  
28  
29 cancer setting. Non-chemotherapeutic systemic treatment options like targeted therapy and  
30  
31 immunotherapy can be assessed by the risk score for predicting toxicity.  
32  
33

34  
35 In conclusion, the current study validates the CARG risk score in predicting for grade 3-5  
36  
37 toxicities in Indian older adult cancer patients receiving curative intent chemotherapy. The  
38  
39 score contributes to informed clinical decision making with regard to planning treatment and  
40  
41 expectation of toxicity in this cohort of patients. Additionally, indices such as ECOG PS and  
42  
43 Charlson Comorbidity Index are inadequate to predict for toxicities and should only be used  
44  
45 along with other measures to predict for chemotherapy related toxicities.  
46  
47  
48

#### 49 References :

- 50  
51  
52 1. Marosi C, Köller M. Challenge of cancer in the elderly. ESMO Open. 2016 Apr  
53  
54 1;1(3): e000020.  
55  
56  
57 2. Jemal A, Siegel R, Xu J, Ward E. Cancer statistics, 2010. CA Cancer J Clin. 2010  
58  
59 Oct;60(5):277–300.  
60

- 1  
2  
3 3. Patil VM, Chakraborty S, Dessai S, Kumar SS, Ratheesan K, Bindu T, et al. Patterns  
4 of care in geriatric cancer patients – An audit from a rural based hospital cancer registry in  
5 Kerala. *Indian J Cancer*. 2015 Jan 1;52(1):157.  
6  
7
- 8  
9  
10 4. Zhao L, Leung L-H, Wang J, Li H, Che J, Liu L, et al. Association between Charlson  
11 comorbidity index score and outcome in patients with stage IIIB-IV non-small cell lung  
12 cancer. *BMC Pulm Med* [Internet]. 2017 Aug 15 [cited 2020 Jun 17];17. Available from:  
13 <https://www.ncbi.nlm.nih.gov/pmc/articles/PMC5556668/>  
14  
15  
16  
17  
18  
19
- 20 5. Edahyr B, Lind M, Karsera L, Mafi R, Wallace K, Howell G, et al. PUB068 The  
21 Applicability of Comorbidity Indices in Predicting Chemo toxicity in Non-Small Cell Lung  
22 Cancer. *J Thorac Oncol*. 2017 Jan 1;12(1): S1487–8.  
23  
24  
25  
26  
27
- 28 6. van Abbema DL, van den Akker M, Janssen-Heijnen ML, van den Berkmortel F,  
29 Hoeben A, de Vos-Geelen J, et al. Patient- and tumor-related predictors of chemotherapy  
30 intolerance in older patients with cancer: A systematic review. *J Geriatr Oncol*. 2019 Jan  
31 1;10(1):31–41.  
32  
33  
34  
35  
36  
37
- 38 7. Hurria A, Togawa K, Mohile SG, Owusu C, Klepin HD, Gross CP, et al. Predicting  
39 Chemotherapy Toxicity in Older Adults With Cancer: A Prospective Multicenter Study. *J*  
40 *Clin Oncol*. 2011 Sep 1;29(25):3457–65.  
41  
42  
43  
44  
45
- 46 8. Hurria A, Mohile S, Gajra A, Klepin H, Muss H, Chapman A, et al. Validation of a  
47 Prediction Tool for Chemotherapy Toxicity in Older Adults With Cancer. *J Clin Oncol*. 2016  
48 May 16;34(20):2366–71.  
49  
50  
51  
52
- 53 9. Nie X, Liu D, Li Q, Bai C. Predicting chemotherapy toxicity in older adults with lung  
54 cancer. *J Geriatr Oncol*. 2013 Oct 1;4(4):334–9.  
55  
56  
57  
58  
59  
60

10. Alibhai SMH, Aziz S, Manokumar T, Timilshina N, Breunis H. A comparison of the CARG tool, the VES-13, and oncologist judgment in predicting grade 3+ toxicities in men undergoing chemotherapy for metastatic prostate cancer. *J Geriatr Oncol*. 2017;8(1):31–6.
11. Yang C-C, Fong Y, Lin L-C, Que J, Ting W-C, Chang C-L, et al. The age-adjusted Charlson comorbidity index is a better predictor of survival in operated lung cancer patients than the Charlson and Elixhauser comorbidity indices. *Eur J Cardiothorac Surg*. 2018 Jan 1;53(1):235–40.
12. Noronha V, Talreja V, Joshi A, Patil V, Prabhash K. Survey for geriatric assessment in practicing oncologists in India. *Cancer Res Stat Treat*. 2019 Jul 1;2(2):232.
13. Noronha V, Ramaswamy A, Dhekle R, Talreja V, Gota V, Gawit K, et al. Initial experience of a geriatric oncology clinic in a tertiary cancer center in India. *Cancer Res Stat Treat*. 2020 Jul 1;3(2):208.
14. Moth EB, Kiely BE, Stefanic N, Naganathan V, Martin A, Grimison P, et al. Predicting chemotherapy toxicity in older adults: Comparing the predictive value of the CARG Toxicity Score with oncologists' estimates of toxicity based on clinical judgement. *J Geriatr Oncol*. 2019;10(2):202–9.
15. Extermann M, Boler I, Reich RR, Lyman GH, Brown RH, DeFelice J, et al. Predicting the risk of chemotherapy toxicity in older patients: The Chemotherapy Risk Assessment Scale for High-Age Patients (CRASH) score. *Cancer*. 2012;118(13):3377–86.
16. Zhang J, Liao X, Feng J, Yin T, Liang Y. Prospective comparison of the value of CRASH and CARG toxicity scores in predicting chemotherapy toxicity in geriatric oncology. *Oncol Lett*. 2019 Oct 31;18(5):4947–55.

**Figure legends:**

Figure 1- CARG (A) vs. (B) ACCI vs. (C) ECOG PS predict Grade 3 to 5 toxicity

**Tables**

Table 1 - Baseline characteristics of patients

| Characteristic                                                                                                                                                           | Current study<br>Number (%)<br>(n=270) | CARG<br>training<br>cohort<br>(n=500) |
|--------------------------------------------------------------------------------------------------------------------------------------------------------------------------|----------------------------------------|---------------------------------------|
| Mean age in years (range)                                                                                                                                                | 69 (65-83)                             | 73 (65-91)                            |
| Gender <ul style="list-style-type: none"> <li>Female</li> <li>Male</li> </ul>                                                                                            | 121 (45)<br>149 (55)                   | 281 (56)<br>219 (44)                  |
| Comorbidities <ul style="list-style-type: none"> <li>Hypertension</li> <li>Diabetes mellitus</li> <li>Coronary artery disease</li> <li>Chronic kidney disease</li> </ul> | 114 (42)<br>71 (26)<br>12 (4)<br>3 (1) | 52%<br>-<br>20%<br>-                  |
| Number of comorbidities <ul style="list-style-type: none"> <li>0</li> <li>1</li> <li>&gt;=2</li> </ul>                                                                   | 125 (46)<br>95 (35)<br>50 (19)         | 10%<br>-<br>-                         |
| Cancer stage <ul style="list-style-type: none"> <li>Stage I-III</li> </ul>                                                                                               | 270 (100)                              | 191 (38)                              |
| Undergone resection                                                                                                                                                      | 210 (78)                               | -                                     |
| ECOG performance status (clinician assessed) <ul style="list-style-type: none"> <li>0/1</li> <li>2</li> </ul>                                                            | 230 (85)<br>40 (15)                    | 402 (80) *<br>86 (17) **              |



|                                                                                                                                                                                                                                                                                                                                                                                                                                                                                                                                                                                                                                                                                               |                                                                                                                    |                                                                                                                            |
|-----------------------------------------------------------------------------------------------------------------------------------------------------------------------------------------------------------------------------------------------------------------------------------------------------------------------------------------------------------------------------------------------------------------------------------------------------------------------------------------------------------------------------------------------------------------------------------------------------------------------------------------------------------------------------------------------|--------------------------------------------------------------------------------------------------------------------|----------------------------------------------------------------------------------------------------------------------------|
| Factors assessed in CARG <ul style="list-style-type: none"> <li>• Age <math>\geq</math> 72 years</li> <li>• Cancer type GI or GU</li> <li>• Chemotherapy dosing, standard dose</li> <li>• No. of chemotherapy drugs, polychemotherapy</li> <li>• Haemoglobin &lt; 11 g/dL (male), &lt; 10 g/dL (female)</li> <li>• Creatinine clearance &lt; 34 mL/min</li> <li>• Hearing, fair or worse</li> <li>• No. of falls in last 6 months, 1 or more</li> <li>• IADL: Taking medications, with some help/unable</li> <li>• MOS: Walking 1 block, somewhat limited/limited a lot</li> <li>• MOS: Decreased social activity because of physical/emotional health, limited at least sometimes</li> </ul> | 60 (22)<br>212 (79)<br>205 (76)<br>194 (72)<br>99 (37)<br>5 (2)<br>19 (7)<br>18 (7)<br>29 (11)<br>17 (6)<br>18 (7) | 270 (54)<br>185 (37)<br>380 (76)<br>351 (70)<br>62 (12)<br>44 (9)<br>123 (25)<br>91 (18)<br>39 (8)<br>109 (22)<br>218 (44) |
| Median overall risk score<br>Risk stratification <ul style="list-style-type: none"> <li>• Low risk (0-5 points)</li> <li>• Intermediate risk (6-9 points)</li> <li>• High risk (10-19 points)</li> </ul>                                                                                                                                                                                                                                                                                                                                                                                                                                                                                      | 6<br>72 (27)<br>164 (61)<br>34 (13)                                                                                | 7<br>128 (26)<br>227 (45)<br>109 (22)                                                                                      |
| Age adjusted Charlson's Comorbidity Index <ul style="list-style-type: none"> <li>• <math>\leq</math>4</li> <li>• &gt;4</li> </ul>                                                                                                                                                                                                                                                                                                                                                                                                                                                                                                                                                             | 111(41)<br>159(59)                                                                                                 | -<br>-                                                                                                                     |

\*equivalent to KPS $\geq$ 80; \*\* equivalent to KPS 60-70

Table 2 – Treatment related Grade 3 – grade 5 toxicities

| Toxicity type                 | Grade 3 (%) | Grade 4 (%) | Grade 5 (%) |
|-------------------------------|-------------|-------------|-------------|
| Haematological                |             |             |             |
| Anaemia                       | 14 (5)      | 0           | 0           |
| Neutropenia                   | 18 (7)      | 8(3)        | 0           |
| Thrombocytopenia              | 6 (2)       | 1 (0.4)     | 0           |
| Febrile neutropenia           | 12 (4)      | 2 (0.7)     | 3(1)        |
| Cumulative haematological     | 46 (17)     | 11 (4)      | 3(1)        |
| Non-haematological            |             |             |             |
| Diarrhoea                     | 16 (6)      | 4 (2)       | 3(1) *      |
| Vomiting                      | 12 (4)      | 1(0.4)      | 1(0.3) **   |
| Mucositis                     | 10 (4)      | 0           |             |
| Constipation                  | 1 (0.4)     | 0           |             |
| Hand-foot-syndrome            | 1 (0.4)     | -           |             |
| Neuropathy                    | 3 (1)       | -           |             |
| Infection with normal ANC     | 47 (17)     | 7(3)        |             |
| Hyponatremia                  | 8 (3)       | 2 (0.7)     |             |
| Fatigue                       | 24 (9)      | -           |             |
| Sudden cardiac death          |             |             | 4(1)        |
| Cumulative non-haematological | 99(37)      | 13(5)       | 8(3)        |
| Cumulative (all toxicities)   | 119(44)     | 22(8)       | 11(4)       |

\*All 3 patients developed dehydration with resulting acute renal failure. \*\*Patient developed grade 4 vomiting with irreversible grade 4 hyponatremia resulting in death

Table 3 - Ability of CARG Risk Score Versus Physician assessed ECOG PS Versus Age adjusted Charlson's Comorbidity Index (ACCI) to Predict Grade 3-5 Chemotherapy Toxicity

| Risk Stratification                       | No toxicity |    | Toxicity |    | p value |
|-------------------------------------------|-------------|----|----------|----|---------|
|                                           | Number      | %  | Number   | %  |         |
| CARG risk score                           |             |    |          |    |         |
| • Low                                     | 42          | 58 | 30       | 42 | 0.001   |
| • Intermediate                            | 81          | 49 | 83       | 51 |         |
| • High                                    | 7           | 21 | 27       | 79 |         |
| Physician assessed ECOG PS                |             |    |          |    |         |
| • 0                                       | 5           | 56 | 4        | 44 | 0.69    |
| • 1                                       | 108         | 49 | 113      | 51 |         |
| • 2                                       | 17          | 43 | 23       | 57 |         |
| Age adjusted Charlson's Comorbidity Index |             |    |          |    |         |
| • ≤4                                      | 55          | 50 | 56       | 50 | 0.7     |
| • >4                                      | 75          | 47 | 84       | 53 |         |

Figure 1 – Ability of CARG risk score (A) versus (B) Age adjusted Charlson Comorbidity Index (ACCI) versus (C) ECOG Performance Status Index to predict Grade 3 to 5 chemotherapy toxicity.

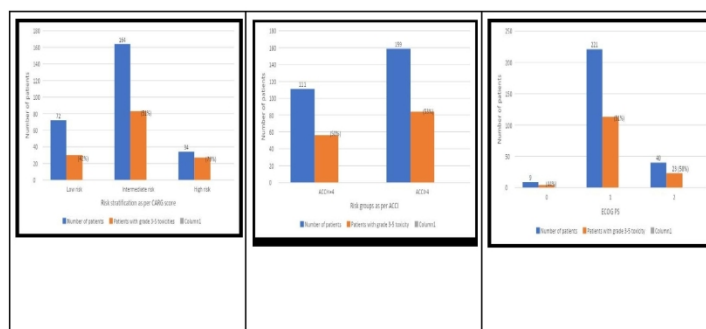

Figure 1- CARG (A) vs. (B) ACCI vs. (C) ECOG PS predict Grade 3 to 5 toxicity

215x279mm (300 x 300 DPI)

Supplementary table 1 – Treatment- related Grade 1 – grade 2 toxicities

| Toxicity type                 | Grade 1/2 toxicities (%) |
|-------------------------------|--------------------------|
| Haematological                |                          |
| Anaemia                       | 148(55)                  |
| Neutropenia                   | 52(19)                   |
| Cumulative haematological     | 160(59)                  |
| Non-haematological            |                          |
| Diarrhoea                     | 131(49)                  |
| Vomiting                      | 140(52)                  |
| Mucositis                     | 57(21)                   |
| Constipation                  | 41(15)                   |
| Hand-foot-syndrome            | 59(22)                   |
| Neuropathy                    | 75(28)                   |
| Hyponatremia                  | 17(6)                    |
| Fatigue                       | 197(73)                  |
| Cumulative non-haematological | 230(85)                  |
| Cumulative (all toxicities)   | 234(87)                  |

Supplementary table 2 - Ability of individual factors in the CARG risk score to predict for Grade 3 to 5 toxicities

| Risk factor                                                                                     | Prevalence |    | Toxicity |    | p value | OR (95% CI)       |
|-------------------------------------------------------------------------------------------------|------------|----|----------|----|---------|-------------------|
|                                                                                                 | Number     | %  | Number   | %  |         |                   |
| Age $\geq$ 72 years                                                                             | 60         | 22 | 34       | 57 | 0.4     | 1.28 (0.72-2.29)  |
| Cancer type (GI or GU)                                                                          | 212        | 79 | 116      | 55 | 0.07    | 1.71 (0.95-3.08)  |
| Chemotherapy dosing, standard dose                                                              | 201        | 74 | 101      | 50 | 0.37    | 0.77 (0.45-1.35)  |
| Polychemotherapy                                                                                | 194        | 72 | 106      | 55 | 0.14    | 1.48 (0.87-2.54)  |
| Haemoglobin $<$ 11gm% (male), $<$ 10gm% (female)                                                | 99         | 37 | 65       | 66 | 0.001   | 2.45(1.47-4.09)   |
| Creatinine clearance $<$ 34ml/min                                                               | 5          | 2  | 3        | 60 | 0.71    | 1.4(0.23-8.52)    |
| Hearing, fair or worse                                                                          | 19         | 7  | 10       | 53 | 0.94    | 1.03(0.41-2.63)   |
| No. of falls in last 6 months, $\geq$ 1                                                         | 18         | 7  | 10       | 56 | 0.75    | 1.17(0.45-3.07)   |
| IADL, taking medications, with some help/unable                                                 | 29         | 11 | 17       | 59 | 0.44    | 1.336 (0.62-2.97) |
| MOS, walking 1 block equivalent, somewhat limited/limited a lot                                 | 17         | 6  | 11       | 65 | 0.27    | 1.76 (0.63-4.91)  |
| MOS, decreased social activity because of physical/emotional health, limited at least sometimes | 18         | 7  | 12       | 67 | 0.19    | 1.94(0.71-5.32)   |

1  
2  
3  
4  
5  
6  
7  
8  
9  
10  
11  
12  
13  
14  
15  
16  
17  
18  
19  
20  
21  
22  
23  
24  
25  
26  
27  
28  
29  
30  
31  
32  
33  
34  
35  
36  
37  
38  
39  
40  
41  
42  
43  
44  
45  
46  
47  
48  
49  
50  
51  
52  
53  
54  
55  
56  
57  
58  
59  
60

**Precis**

The CARG risk score was studied prospectively in older adult cancer patients being treated with curative intent and accurately predicts for grade 3-5 toxicities. The score can be incorporated into clinical decision making for older adults with cancer, and performed better than traditional indices such as the age adjusted Charlson Comorbidity Index and ECOG PS.



**STROBE 2007 (v4) Statement—Checklist of items that should be included in reports of *cohort studies***

| Section/Topic                | Item # | Recommendation                                                                                                                                                                       | Reported on page # |
|------------------------------|--------|--------------------------------------------------------------------------------------------------------------------------------------------------------------------------------------|--------------------|
| <b>Title and abstract</b>    | 1      | (a) Indicate the study's design with a commonly used term in the title or the abstract                                                                                               | 1                  |
|                              |        | (b) Provide in the abstract an informative and balanced summary of what was done and what was found                                                                                  | 6                  |
| <b>Introduction</b>          |        |                                                                                                                                                                                      |                    |
| Background/rationale         | 2      | Explain the scientific background and rationale for the investigation being reported                                                                                                 | 9                  |
| Objectives                   | 3      | State specific objectives, including any prespecified hypotheses                                                                                                                     | 10                 |
| <b>Methods</b>               |        |                                                                                                                                                                                      |                    |
| Study design                 | 4      | Present key elements of study design early in the paper                                                                                                                              | 10                 |
| Setting                      | 5      | Describe the setting, locations, and relevant dates, including periods of recruitment, exposure, follow-up, and data collection                                                      | 10                 |
| Participants                 | 6      | (a) Give the eligibility criteria, and the sources and methods of selection of participants. Describe methods of follow-up                                                           | 10                 |
|                              |        | (b) For matched studies, give matching criteria and number of exposed and unexposed                                                                                                  | 10                 |
| Variables                    | 7      | Clearly define all outcomes, exposures, predictors, potential confounders, and effect modifiers. Give diagnostic criteria, if applicable                                             | 11                 |
| Data sources/<br>measurement | 8*     | For each variable of interest, give sources of data and details of methods of assessment (measurement). Describe comparability of assessment methods if there is more than one group | 11                 |
| Bias                         | 9      | Describe any efforts to address potential sources of bias                                                                                                                            | 12                 |
| Study size                   | 10     | Explain how the study size was arrived at                                                                                                                                            | 12                 |
| Quantitative variables       | 11     | Explain how quantitative variables were handled in the analyses. If applicable, describe which groupings were chosen and why                                                         | 12                 |
| Statistical methods          | 12     | (a) Describe all statistical methods, including those used to control for confounding                                                                                                | 12                 |
|                              |        | (b) Describe any methods used to examine subgroups and interactions                                                                                                                  | 12                 |
|                              |        | (c) Explain how missing data were addressed                                                                                                                                          | 12                 |
|                              |        | (d) If applicable, explain how loss to follow-up was addressed                                                                                                                       |                    |
|                              |        | (e) Describe any sensitivity analyses                                                                                                                                                |                    |
| <b>Results</b>               |        |                                                                                                                                                                                      | 13                 |

|                          |     |                                                                                                                                                                                                              |    |
|--------------------------|-----|--------------------------------------------------------------------------------------------------------------------------------------------------------------------------------------------------------------|----|
| Participants             | 13* | (a) Report numbers of individuals at each stage of study—eg numbers potentially eligible, examined for eligibility, confirmed eligible, included in the study, completing follow-up, and analysed            | 13 |
|                          |     | (b) Give reasons for non-participation at each stage                                                                                                                                                         | 13 |
|                          |     | (c) Consider use of a flow diagram                                                                                                                                                                           |    |
| Descriptive data         | 14* | (a) Give characteristics of study participants (eg demographic, clinical, social) and information on exposures and potential confounders                                                                     | 13 |
|                          |     | (b) Indicate number of participants with missing data for each variable of interest                                                                                                                          | 13 |
|                          |     | (c) Summarise follow-up time (eg, average and total amount)                                                                                                                                                  | 13 |
| Outcome data             | 15* | Report numbers of outcome events or summary measures over time                                                                                                                                               | 14 |
| Main results             | 16  | (a) Give unadjusted estimates and, if applicable, confounder-adjusted estimates and their precision (eg, 95% confidence interval). Make clear which confounders were adjusted for and why they were included | 14 |
|                          |     | (b) Report category boundaries when continuous variables were categorized                                                                                                                                    |    |
|                          |     | (c) If relevant, consider translating estimates of relative risk into absolute risk for a meaningful time period                                                                                             |    |
| Other analyses           | 17  | Report other analyses done—eg analyses of subgroups and interactions, and sensitivity analyses                                                                                                               | 14 |
| <b>Discussion</b>        |     |                                                                                                                                                                                                              |    |
| Key results              | 18  | Summarise key results with reference to study objectives                                                                                                                                                     | 15 |
| <b>Limitations</b>       |     |                                                                                                                                                                                                              |    |
| Interpretation           | 20  | Give a cautious overall interpretation of results considering objectives, limitations, multiplicity of analyses, results from similar studies, and other relevant evidence                                   | 18 |
| Generalisability         | 21  | Discuss the generalisability (external validity) of the study results                                                                                                                                        | 17 |
| <b>Other information</b> |     |                                                                                                                                                                                                              |    |
| Funding                  | 22  | Give the source of funding and the role of the funders for the present study and, if applicable, for the original study on which the present article is based                                                | 5  |

\*Give information separately for cases and controls in case-control studies and, if applicable, for exposed and unexposed groups in cohort and cross-sectional studies.

**Note:** An Explanation and Elaboration article discusses each checklist item and gives methodological background and published examples of transparent reporting. The STROBE checklist is best used in conjunction with this article (freely available on the Web sites of PLoS Medicine at <http://www.plosmedicine.org/>, Annals of Internal Medicine at <http://www.annals.org/>, and Epidemiology at <http://www.epidem.com/>). Information on the STROBE Initiative is available at [www.strobe-statement.org](http://www.strobe-statement.org).

# BMJ Open

## Prospective validation of the Cancer Ageing Research Group (CARG) score in geriatric patients undergoing curative intent chemotherapy: A simple assay to predict clinically relevant toxicity in the elderly

|                                 |                                                                                                                                                                                                                                                                                                                                                                                                                                                                                                                                                                                                                                                                                                                                                                                                                                                                                                                                                                                                                                                                                                                                                                                                                                                                                                                                  |
|---------------------------------|----------------------------------------------------------------------------------------------------------------------------------------------------------------------------------------------------------------------------------------------------------------------------------------------------------------------------------------------------------------------------------------------------------------------------------------------------------------------------------------------------------------------------------------------------------------------------------------------------------------------------------------------------------------------------------------------------------------------------------------------------------------------------------------------------------------------------------------------------------------------------------------------------------------------------------------------------------------------------------------------------------------------------------------------------------------------------------------------------------------------------------------------------------------------------------------------------------------------------------------------------------------------------------------------------------------------------------|
| Journal:                        | <i>BMJ Open</i>                                                                                                                                                                                                                                                                                                                                                                                                                                                                                                                                                                                                                                                                                                                                                                                                                                                                                                                                                                                                                                                                                                                                                                                                                                                                                                                  |
| Manuscript ID                   | bmjopen-2020-047376.R1                                                                                                                                                                                                                                                                                                                                                                                                                                                                                                                                                                                                                                                                                                                                                                                                                                                                                                                                                                                                                                                                                                                                                                                                                                                                                                           |
| Article Type:                   | Original research                                                                                                                                                                                                                                                                                                                                                                                                                                                                                                                                                                                                                                                                                                                                                                                                                                                                                                                                                                                                                                                                                                                                                                                                                                                                                                                |
| Date Submitted by the Author:   | 14-Mar-2021                                                                                                                                                                                                                                                                                                                                                                                                                                                                                                                                                                                                                                                                                                                                                                                                                                                                                                                                                                                                                                                                                                                                                                                                                                                                                                                      |
| Complete List of Authors:       | Ostwal, Vikas; Tata Memorial Centre, Homi Bhabha National Institute, Mumbai, India., Medical Oncology<br>Ramaswamy, Anant; Tata Memorial Centre, Homi Bhabha National Institute, Mumbai, India., Department of medical Oncology<br>Bhargava, Prabhat; Tata Memorial Centre<br>Hatkhambkar, Tejaswee; Tata Memorial Centre, Homi Bhabha National Institute, Mumbai, India., Department of medical Oncology<br>Swami, Rohit; Narayana Multi speciality Hospital, Jaipur India. , Medical Oncology<br>Rastogi, Sameer; AIIMS New Delhi, India.<br>Mandavkar, Sarika; Tata Memorial Centre, Homi Bhabha National Institute, Mumbai, India., Department of medical Oncology<br>Ghosh, Jaya; Tata Memorial Centre, Homi Bhabha National Institute, Mumbai, India., Department of medical Oncology<br>Bajpai, Jyoti; Tata Memorial Centre, Homi Bhabha National Institute, Mumbai, India., Department of medical Oncology<br>Gulia, Seema; Tata Memorial Centre, Homi Bhabha National Institute, Mumbai, India., Department of medical Oncology<br>Srinivas, Sujay; Tata Memorial Centre, Homi Bhabha National Institute, Mumbai, India., Department of medical Oncology<br>Rath, Sushmita; Tata Memorial Centre<br>Gupta, Sudeep; Tata Memorial Centre, Homi Bhabha National Institute, Mumbai, India., Department of medical Oncology |
| <b>Primary Subject Heading</b>: | Geriatric medicine                                                                                                                                                                                                                                                                                                                                                                                                                                                                                                                                                                                                                                                                                                                                                                                                                                                                                                                                                                                                                                                                                                                                                                                                                                                                                                               |
| Secondary Subject Heading:      | Oncology, Pharmacology and therapeutics, Medical management, Geriatric medicine, Health services research                                                                                                                                                                                                                                                                                                                                                                                                                                                                                                                                                                                                                                                                                                                                                                                                                                                                                                                                                                                                                                                                                                                                                                                                                        |
| Keywords:                       | CHEMOTHERAPY, Adult oncology < ONCOLOGY, Gynaecological oncology < ONCOLOGY, Gastrointestinal tumours < ONCOLOGY, Breast tumours < ONCOLOGY, Adverse events < THERAPEUTICS                                                                                                                                                                                                                                                                                                                                                                                                                                                                                                                                                                                                                                                                                                                                                                                                                                                                                                                                                                                                                                                                                                                                                       |
|                                 |                                                                                                                                                                                                                                                                                                                                                                                                                                                                                                                                                                                                                                                                                                                                                                                                                                                                                                                                                                                                                                                                                                                                                                                                                                                                                                                                  |

1  
2  
3  
4  
5  
6  
7  
8  
9  
10  
11  
12  
13  
14  
15  
16  
17  
18  
19  
20  
21  
22  
23  
24  
25  
26  
27  
28  
29  
30  
31  
32  
33  
34  
35  
36  
37  
38  
39  
40  
41  
42  
43  
44  
45  
46  
47  
48  
49  
50  
51  
52  
53  
54  
55  
56  
57  
58  
59  
60

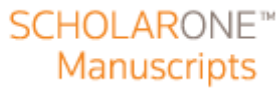



I, the Submitting Author has the right to grant and does grant on behalf of all authors of the Work (as defined in the below author licence), an exclusive licence and/or a non-exclusive licence for contributions from authors who are: i) UK Crown employees; ii) where BMJ has agreed a CC-BY licence shall apply, and/or iii) in accordance with the terms applicable for US Federal Government officers or employees acting as part of their official duties; on a worldwide, perpetual, irrevocable, royalty-free basis to BMJ Publishing Group Ltd ("BMJ") its licensees and where the relevant Journal is co-owned by BMJ to the co-owners of the Journal, to publish the Work in this journal and any other BMJ products and to exploit all rights, as set out in our [licence](#).

The Submitting Author accepts and understands that any supply made under these terms is made by BMJ to the Submitting Author unless you are acting as an employee on behalf of your employer or a postgraduate student of an affiliated institution which is paying any applicable article publishing charge ("APC") for Open Access articles. Where the Submitting Author wishes to make the Work available on an Open Access basis (and intends to pay the relevant APC), the terms of reuse of such Open Access shall be governed by a Creative Commons licence – details of these licences and which [Creative Commons](#) licence will apply to this Work are set out in our licence referred to above.

Other than as permitted in any relevant BMJ Author's Self Archiving Policies, I confirm this Work has not been accepted for publication elsewhere, is not being considered for publication elsewhere and does not duplicate material already published. I confirm all authors consent to publication of this Work and authorise the granting of this licence.

1  
2  
3  
4  
5  
6  
7  
8  
9  
10  
11  
12  
13  
14  
15  
16  
17  
18  
19  
20  
21  
22  
23  
24  
25  
26  
27  
28  
29  
30  
31  
32  
33  
34  
35  
36  
37  
38  
39  
40  
41  
42  
43  
44  
45  
46  
47  
48  
49  
50  
51  
52  
53  
54  
55  
56  
57  
58  
59  
60

# Title – Prospective validation of the Cancer Ageing Research Group (CARG) score in geriatric patients undergoing curative intent chemotherapy: A simple assay to predict clinically relevant toxicity in the elderly

---

## TITLE PAGE

**Running title** –CARG score in older Indian cancer patients undergoing curative-intent chemotherapy

### Authors

1. Dr. Vikas Ostwal

Professor, Department of Medical Oncology,

Tata Memorial Centre, Homi Bhabha National Institute, Mumbai, India.

Email: dr.vikas.ostwal@gmail.com

2. Dr. Anant Ramaswamy

Associate Professor, Department of Medical Oncology,

Tata Memorial Centre, Homi Bhabha National Institute, Mumbai, India.

Email: anantr13@gmail.com

1  
2  
3 3. Dr Prabhat Bhargava  
4

5  
6 Assistant Professor, Department of Medical Oncology,  
7

8  
9 Tata Memorial Centre, Homi Bhabha National Institute, Mumbai, India.

10  
11 Email: [bhargava611@gmail.com](mailto:bhargava611@gmail.com)  
12  
13

14  
15  
16  
17 4. Ms. Tejaswee Hatkhambkar  
18

19  
20 Research coordinator, Department of Medical Oncology,  
21

22  
23 Tata Memorial Centre, Homi Bhabha National Institute, Mumbai, India.  
24

25  
26 Email: [tejasweehatkambkar@gmail.com](mailto:tejasweehatkambkar@gmail.com)  
27  
28

29  
30  
31 5. Dr Rohit Swami  
32

33  
34 Assistant Professor, Department of Medical Oncology,  
35

36  
37 Narayana Multi specialty Hospital, Jaipur India.  
38

39  
40 Email: [swamirohit21@yahoo.in](mailto:swamirohit21@yahoo.in)  
41  
42

43  
44  
45 6. Dr Sameer Rastogi  
46

47  
48 Associate Professor, Department of Medical Oncology,  
49

50  
51 AIIMS New Delhi, India.  
52

53  
54 Email: [samdoc\\_mamc@yahoo.com](mailto:samdoc_mamc@yahoo.com)  
55  
56

57  
58 7. Ms. Sarika Mandavkar  
59  
60

1  
2  
3 Research nurse, Department of Medical Oncology,  
4

5  
6 Tata Memorial Centre, Homi Bhabha National Institute, Mumbai, India.  
7

8  
9 Email: [sarikamandavkar1@gmail.com](mailto:sarikamandavkar1@gmail.com)  
10  
11  
12  
13

14 8. Dr. Jaya Ghosh  
15

16  
17 Professor, Department of Medical Oncology,  
18

19  
20 Tata Memorial Centre, Homi Bhabha National Institute, Mumbai, India.  
21

22  
23 Email: [archana\\_jaya\\_ghosh@yahoo.co.in](mailto:archana_jaya_ghosh@yahoo.co.in)  
24  
25  
26  
27

28 9. Dr. Jyoti Bajpai  
29

30  
31 Professor, Department of Medical Oncology,  
32

33  
34 Tata Memorial Centre, Homi Bhabha National Institute, Mumbai, India.  
35

36  
37 Email: [dr\\_jyotibajpai@yahoo.co.in](mailto:dr_jyotibajpai@yahoo.co.in)  
38  
39  
40  
41

42 10. Dr. Seema Gulia  
43

44  
45 Professor, Department of Medical Oncology,  
46

47  
48 Tata Memorial Centre, Homi Bhabha National Institute, Mumbai, India.  
49

50  
51 Email: [drseemagulia@gmail.com](mailto:drseemagulia@gmail.com)  
52  
53  
54  
55

56 11. Dr Sujay Srinivas  
57

58  
59 Assistant Professor, Department of Medical Oncology,  
60



1  
2  
3 Tata Memorial Centre, Homi Bhabha National Institute, Mumbai, India.  
4  
5

6 Email: [sujay.0541@gmail.com](mailto:sujay.0541@gmail.com)  
7  
8  
9

10  
11 12. Dr Sushmita Rath  
12

13  
14 Assistant Professor, Department of Medical Oncology,  
15

16  
17 Tata Memorial Centre, Homi Bhabha National Institute, Mumbai, India.  
18

19  
20 Email: [sushmitarath73@gmail.com](mailto:sushmitarath73@gmail.com)  
21  
22  
23

24  
25 13. Dr Sudeep Gupta  
26

27  
28 Professor, Department of Medical Oncology,  
29

30  
31 Director ACTREC, Room 309/310, 3rd Floor, Paymaster Shodhika,  
32

33 ACTREC (Advanced Centre for Treatment, Research and Education in Cancer), Homi Bhabha  
34

35 National Institute (HBNI), Navi Mumbai - 410210, Maharashtra, India  
36

37  
38 Email id - [sudeepgupta04@yahoo.com](mailto:sudeepgupta04@yahoo.com)  
39  
40  
41  
42

43 Corresponding author  
44

45  
46 Dr. Anant Ramaswamy  
47

48  
49 Associate Professor, Department of Medical Oncology,  
50

51  
52 Tata Memorial Centre, Homi Bhabha National Institute, Mumbai, India.  
53

54  
55 Email: [anantr13@gmail.com](mailto:anantr13@gmail.com)  
56  
57  
58  
59  
60

## Funding:

Received grants to Tata Memorial centre, Mumbai for the conduct of present study from

- a. Indian Association of Supportive Care in Cancer awarded research award during BEST OF MASCC 2019. **Grant number: 1716-A**
- b. Intas Pharmaceuticals Private Limited **Grant number: 1716-B – The Pharmaceutical company, Intas Pharmaceutical Private Limited, provided an unrestricted educational grant to Tata Memorial Centre (The Institute) for the conduct of the study. This was utilized for appointing a trained medical doctor for the purpose of the study.**

Prior presentation: None

Conflict of interest: None

## Author Contributions:

**1. Dr. Vikas Ostwal**

Author contribution - Conception and design, analysis and interpretation of data, drafting of manuscript, Final approval of the submitted version.

**2. Dr. Anant Ramaswamy**

Author contribution - Conception and design, analysis and interpretation of data, drafting of manuscript, Final approval of the submitted version.

**3. Dr Prabhat Bhargava**

Author contribution - analysis and interpretation of data, drafting of manuscript, Final approval of the submitted version.

**4. Ms. Tejaswee Hatkhambkar**

1  
2  
3 Author contribution - analysis and interpretation of data, Final approval of the  
4  
5 submitted version.  
6  
7

8 5. Dr Rohit Swami  
9

10 Author contribution - analysis and interpretation of data, drafting of manuscript,  
11  
12 Final approval of the submitted version.  
13  
14

15 6. Dr Sameer Rastogi  
16

17 Author contribution - Conception and design, drafting of manuscript, Final approval  
18  
19 of the submitted version.  
20  
21

22 7. Ms. Sarika Mandavkar  
23

24 Author contribution - analysis and interpretation of data, drafting of manuscript,  
25  
26 Final approval of the submitted version.  
27  
28

29 8. Dr. Jaya Ghosh  
30

31 Author contribution - analysis and interpretation of data, drafting of manuscript,  
32  
33 Final approval of the submitted version.  
34  
35

36 9. Dr Sushmita Rath  
37

38 Author contribution - analysis and interpretation of data, drafting of manuscript,  
39  
40 Final approval of the submitted version.  
41  
42

43  
44  
45 10. Dr. Jyoti Bajpai  
46

47 Author contribution - analysis and interpretation of data, drafting of manuscript,  
48  
49 Final approval of the submitted version.  
50  
51

52 11. Dr. Seema Gulia  
53

54 Author contribution - analysis and interpretation of data, drafting of manuscript,  
55  
56 Final approval of the submitted version.  
57  
58  
59  
60

1  
2  
3  
4  
5  
6  
7  
12. Dr Sujay Srinivas

8 Author contribution - analysis and interpretation of data, drafting of manuscript,

9  
10 Final approval of the submitted version.  
11  
12  
13  
14

15  
16  
17  
18  
19  
20  
21  
22  
13. Dr Sudeep Gupta

17 Author contribution - Conception and design, analysis and interpretation of data,

18  
19  
20  
21  
22  
23  
24  
25  
26  
27  
28  
29  
30  
31  
32  
33  
34  
35  
36  
37  
38  
39  
40  
41  
42  
43  
44  
45  
46  
47  
48  
49  
50  
51  
52  
53  
54  
55  
56  
57  
58  
59  
60  
drafting of manuscript, Final approval of the submitted version.

23 Acknowledgements: Nil

24  
25  
26  
27  
28  
29  
30  
31  
32  
33  
34  
35  
36  
37  
38  
39  
40  
41  
42  
43  
44  
45  
46  
47  
48  
49  
50  
51  
52  
53  
54  
55  
56  
57  
58  
59  
60  
Clinical trial registration: CTRI/2016/10/007357

28 Ethics committee Clearance:

- 31 1. Name of the Ethics committee: Institutional Ethics committee, Tata Memorial Centre,  
32  
33  
34  
35  
36  
37  
38  
39  
40  
41  
42  
43  
44  
45  
46  
47  
48  
49  
50  
51  
52  
53  
54  
55  
56  
57  
58  
59  
60  
Parel, Mumbai.
- 37 2. IEC approval ID: IEC/1019/1716/001
- 40 3. The participants gave informed consent before taking part in the study.

43 Word count: 3398 (excluding abstract and references)

44  
45  
46  
47  
48  
49  
50  
51  
52  
53  
54  
55  
56  
57  
58  
59  
60  
Data Availability statement: Data are available upon reasonable request

1  
2  
3 **Abstract:**  
4

5 **Importance:**  
6

7  
8 The Cancer Aging Research Group (CARG) toxicity score is used to assess toxicity risk in  
9  
10 geriatric patients receiving chemotherapy.  
11

12  
13 **Objective:**  
14

15  
16 The primary aim was to validate the CARG score in geriatric patients treated with curative  
17  
18 intent chemotherapy in predicting Grade 3-5 toxicities.  
19

20  
21 **Design:**  
22

23  
24 This was a longitudinal prospective observational study  
25

26  
27 **Setting:**  
28

29  
30 Tata Memorial Hospital, Mumbai, India, a tertiary cancer care referral centre.  
31

32  
33 **Participants:**  
34

35  
36 Patients age  $\geq 65$  with gastrointestinal, breast or gynaecological stage I-III cancers being  
37  
38 planned for curative intent chemotherapy. A total of 270 patients were required for accrual in  
39  
40 the study.  
41

42  
43 **Exposure(s):**  
44

45  
46 Total risk score ranged from 0 (lowest toxicity risk) to 19 (highest toxicity risk).  
47

48  
49 **Main Outcome(s) and Measure(s):**  
50

51  
52 The primary endpoint of the study was to evaluate whether the CARG risk score predicted for  
53  
54 grade 3-5 toxicities.  
55

56  
57 **Results:**  
58  
59  
60

1  
2  
3 The study cohort of 270 patients had a mean age of 69 years (65-83), with the most common  
4 cancers being gastrointestinal (79%). Fifty-two percent of patients had at-least one grade 3-5  
5 toxicity. The risk of toxicity was increased with increasing risk score (42% low, 51%  
6 medium, 79% high risk;  $P < .001$ ). There was no association between either ECOG PS  
7 (p=0.69) or age adjusted Charlson Comorbidity Index (p=0.79) risk categories and grade 3-5  
8 chemotherapy toxicity.  
9  
10  
11  
12  
13  
14  
15  
16

### 17 **Conclusions and Relevance:**

18  
19  
20 The current study validates the CARG risk score in predicting for grade 3-5 toxicities in  
21 geriatric oncology patients receiving curative intent chemotherapy and can be considered as  
22 standard of care before planning chemotherapy in every elderly patient.  
23  
24  
25  
26  
27  
28  
29  
30

31 **Key words** – CARG risk; Hurria score, curative, ECOG PS, Charlson Comorbidity Index,  
32 chemotoxicity  
33  
34  
35  
36  
37  
38  
39  
40  
41  
42  
43  
44  
45  
46  
47  
48  
49  
50  
51  
52  
53  
54  
55  
56  
57  
58  
59  
60

**Strengths and limitations of the study:**

- The CARG risk score is a simple tool comprising easily available clinical information.
- This is a prospective study to assess CARG risk score in elderly patients treated with curative intent to predict for grade 3-5 toxicities.
- CARG score performed better than traditional indices such as the age adjusted Charlson Comorbidity Index and ECOG PS.
- The results suggest that the CARG score is valid in the studied population and can be routinely used in clinical practice.
- This study does not include palliative patients and mainly GI cancer patients were recruited.

**Manuscript:****Introduction**

Older adult patients ( age  $\geq 65$  years) with cancer represent a growing proportion of patients in community clinical practice, primarily due to increasing life-spans as well as medical

1  
2  
3 progress contributing to decreased morbidity and mortality from other causes (1). Elderly  
4 patients comprise anywhere between 20% to 60% in community oncology practice, with  
5  
6 variances based on access to cancer care, disease stage and centre specific management  
7  
8 strategies (2,3).  
9

10  
11  
12  
13 The age adjusted Charlson Comorbidity Index (ACCI) and ECOG Performance status (PS)  
14 amongst others have often been used to quantify risks and predict for outcomes in older  
15  
16 adults with cancer, but there is limited data for correlation between these indices and  
17  
18 treatment related side effects (4–6). The Cancer Aging Research Group (CARG) risk score,  
19  
20 developed by Hurria and colleagues, is an easy-to-use tool that predicts for significant  
21  
22 chemotherapy related toxicities (grade 3- grade 5) in older North American adults  $\geq 65$   
23  
24 years starting on chemotherapy (7,8). Based on their training samples and subsequent  
25  
26 validation studies, the investigators clearly identified low, mid and high-risk groups  
27  
28 predicting for increasing rates of grade 3-5 toxicities (low risk: 30%, intermediate risk: 52%,  
29  
30 high risk: 83%) with statistical significance ( $P < 0.001$ ). The CARG risk score has been  
31  
32 validated in other countries and in specific tumor sites to varying degrees (9,10).  
33  
34  
35  
36  
37  
38

39 In older adults being treated with curative intent chemotherapy, there is the possibility of  
40  
41 treating oncologists using standard doses to maximize outcomes, despite patient related  
42  
43 indicators suggesting a requirement for lower doses. This is a unique scenario where further  
44  
45 information on risks and benefits would allow for informed clinical decision making on doses  
46  
47 and drugs to be used. As patients with all stages of cancer were included in the CARG  
48  
49 studies, the ambiguity with regard to its usage in patients being treated with potentially  
50  
51 curative intent lends itself to re-examination.  
52  
53  
54

55  
56 With this background, the investigators conducted a longitudinal prospective study with the  
57  
58 primary aim of validating the CARG risk score in Indian older cancer patients treated with  
59  
60



1  
2  
3 curative intent chemotherapy (neoadjuvant or/and adjuvant chemotherapy). Secondary and  
4  
5 objectives included correlation of the age adjusted Charlson Comorbidity Index (ACCI) and  
6  
7 physician measured ECOG PS with grade 3-5 toxicities. An exploratory component of the  
8  
9 study involved an estimation of grade 1 and grade 2 toxicities and their correlation with the  
10  
11 CARG risk score.  
12  
13

## 14 15 **Materials and methods**

### 16 17 **Patient selection and design**

18  
19  
20 The study was designed as a longitudinal prospective observational study to validate the  
21  
22 CARG risk score in predicting chemotherapy toxicity risk in elderly patients. The study was  
23  
24 conducted at the Tata Memorial Hospital and enrolled consecutive patients aged  $\geq 65$  years,  
25  
26 chemotherapy naïve, with a histological diagnosis of gastrointestinal, breast or gynecological  
27  
28 cancer, stage I-III disease and planned for neoadjuvant or adjuvant systemic chemotherapy as  
29  
30 a potentially curative treatment option.  
31  
32

33  
34  
35 The study was designed by investigators from the Department of Medical Oncology of the Tata  
36  
37 Memorial Hospital and was approved by the ethics committee (IEC/1019/1716/001). The study  
38  
39 was registered at Clinical trial registry of India (CTRI/2016/10/007357). Written informed  
40  
41 consent was obtained from all patients before inclusion in the study.  
42  
43  
44  
45

#### 46 47 **Patient and public involvement:**

48  
49  
50 There was no public or patient involvement in design, conduct or results declaration of the  
51  
52 study.  
53  
54  
55  
56  
57  
58  
59  
60

## Study procedures

Data regarding tumor type and stage, pre-treatment laboratory values, and chemotherapy regimen were recorded. All patients underwent standard pre-chemotherapy work up, including evaluation of end organ function. Patients were planned for chemotherapy by treating oncologist (with an assessment of ECOG PS and ACCI), who was blinded to the risk score. A trained medical doctor calculated the CARG risk score for patients enrolled in the study. The assessment of the score by the trained medical doctor was independently reviewed by an oncologist who was not part of the treating team (7). Total risk score ranged from 0 (lowest toxicity risk) to 19 (highest toxicity risk), with division of the scores into low risk (0-5 points), intermediate risk (6 to 9 points) and high risk (10-19 points) as per the classification in the original study by Hurria et al (7). One modification of the original CARG risk score which was used in the current study was the measurement of 'Walking 1 block'. The concept of measuring distances by a block is not prevalent in India and hence, a distance of 100 meters in the immediate vicinity of the hospital was measured and patients were scored on their ability to walk the same. The chemotherapy dosing for the first cycle of chemotherapy was categorized as 'standard' if 100% doses were planned and 'dose reduced' if any dose below 100% was used. The decision for dose modifications, whether initial or subsequent, was based on assessment by treating oncologist. Besides CARG risk score, the age adjusted Charlson's Comorbidity Index (ACCI) was calculated for all patients as part of standard assessment of older adults with cancer. A cut-off of 4 points ( $\leq 4$  and  $>4$ ) was used to differentiate between low and high CCI scores (11). Patients were followed from beginning till the end of chemotherapy course across all cycles of therapy, though occurrence of a single grade 3-4 toxicity was considered as an endpoint for the purpose of toxicity calculation in the study. Toxicities were captured prospectively at all clinical visits (by treating oncologist and trained medical doctor) and graded as per National Cancer Institute

1  
2  
3 Common Terminology Criteria for Adverse Events (NCI CTCAE), version 4.0. Decision on  
4 relatedness of toxicity to chemotherapy was made by treating physician. Laboratory values  
5 were captured as grade 1 to 5 toxicity if they met the criteria on the date of scheduled  
6 chemotherapy or when patient was seeking attention because of treatment related toxicities.  
7  
8  
9  
10  
11  
12

## 13 Outcomes

14  
15  
16 The primary outcome of the study was the occurrence of any grade 3-5 chemotherapy related  
17 toxicity over the course of planned treatment and its association with the CARG risk score.  
18  
19 The planned secondary endpoints of the study were the correlation of ACCI and ECOG PS  
20 with grade 3-5 chemotherapy related toxicity. Occurrence of any grade 1-2 chemotherapy  
21 related toxicity and its correlation with CARG risk score was an exploratory aspect of the  
22 study.  
23  
24  
25  
26  
27  
28  
29  
30

## 31 Statistical analysis

32  
33  
34  
35 Descriptive analyses were performed to enumerate patient, tumor, treatment characteristics,  
36 CARG risk scores and ACCI. The incidence of grade 3 to grade 5 toxicities were calculated  
37 and compared between CARG risk groups, and ECOG PS cohorts by using the chi-square  
38 test. The CARG risk score is not routinely used in clinical practice in our institution and we  
39 did not have baseline data for the same for the purpose of sample size calculation . We  
40 conducted an internal audit of elderly patients with breast, gastrointestinal and gynecological  
41 cancers receiving curative intent chemotherapy in our hospital and found a 20 % incidence  
42 of grade 3-grade 5 toxicities in elderly patients with ECOG PS 0/1 and controlled or absent  
43 comorbidities (surrogate for “low risk) as opposed to 36% in elderly patients with ECOG PS  
44 2 with or without multiple uncontrolled comorbidities (surrogate for “ high risk”).  
45  
46  
47  
48  
49  
50  
51  
52  
53  
54  
55  
56  
57  
58 Extrapolating these results, a power of 80% and alpha of 5% with 1 sided assumption was  
59  
60

1  
2  
3 required with an estimated sample size required being 246 patients. Assuming an attrition rate  
4  
5 of 10%, a total of 270 patients were required for enrolment in the study. Chi square test was  
6  
7 performed to test the association of the CARG risk score, PS, and ACCI with G 3-5 toxicities  
8  
9 and for association of CARG risk score with grade 1-2 toxicities as well dose modifications.  
10  
11 The predictive ability of the CARG risk score was evaluated by calculating receiver-  
12  
13 operating characteristic (ROC) curves and calculating the area under the curve (also known  
14  
15 as C-statistic). ROC curves were also calculated for ECOG PS and ACCI. All analyses were  
16  
17 performed using SPSS version 25. All tests were two-sided, and a P value of <0.05 was  
18  
19 considered statistically significant.  
20  
21  
22  
23

## 24 25 Results

### 26 27 28 Patient and treatment characteristics

29  
30 The study completed accrual of 270 patients, with mean age of patients being 69 years  
31  
32 (range:65-83), 121 (45%) female patients and 212 patients (79%) having gastrointestinal  
33  
34 cancers. For purposes of comparison, data from the seminal CARG study by Hurria et al is  
35  
36 provided for comparison (table 1). Details of chemotherapeutic regimens are presented in  
37  
38 supplementary table 1.  
39  
40  
41

### 42 43 44 Chemotherapy toxicity

45  
46 At least one grade 3 to 5 toxicity was seen in 140 patients (52%), with 119 (44%) having  
47  
48 grade 3, 22 (8%) having grade 4, and 11(4%) grade 5 toxicities. Grade 3-5 haematological  
49  
50 and non-haematological toxicities occurred in 60 patients (22%) and 120 (45%) patients  
51  
52 respectively. Common haematological toxicities were neutropenia in 26 (10%) and febrile  
53  
54 neutropenia in 17 (6%) patients, while common non-haematological toxicities were  
55  
56 infections, fatigue and diarrhoea in 54 (20%), 24 (9%) and 23 (9%) patients respectively  
57  
58 (table 2).  
59  
60

1  
2  
3 The incidence of grade 1 to grade 2 toxicities are listed in supplementary table 2.  
4  
5

## 6 Correlation of CARG score with toxicity and dose modifications 7 8

9 The median overall CARG risk score was 6 (range, 0 to 19). Of the 270 patients, 72 (27%),  
10 164 (61%) and 34 (13%) were classified as low, intermediate and high risk, respectively  
11 (table 1). Grade 3-5 toxicities were seen in 30(42%), 83 (51%) and 27 (79%) patients with  
12 low, intermediate and high-risk score. There was a significant difference in toxicity amongst  
13 the risk groups ( $p<0.001$ ) (figure 1 and table 2). The odds of a patient classified as  
14 intermediate risk having a grade 3-5 toxicity as compared to patient with low risk was 1.64  
15 (95% CI: 1.23-2.13), while the odds of a patient classified as high risk having a grade 3-5  
16 toxicity as compared to patient with low risk was 7.58 (95% CI:2.61-21.73). Area under the  
17 ROC curve for the predictive model in the current cohort was 0.63 (95% CI: 0.57-0.7). The  
18 correlation of individual components of the CARG risk score with grade 3-5 toxicities is  
19 enumerated in supplementary table 3.  
20  
21  
22  
23  
24  
25  
26  
27  
28  
29  
30  
31  
32  
33

34  
35 Grade 1-2 toxicities were seen in 61(86%), 144(88%) and 29 (85%) patients with low,  
36 intermediate and high-risk score. There was no significant difference in toxicity amongst the  
37 CARG risk groups ( $p=0.79$ ).  
38  
39  
40  
41  
42

43 The incidence of grade 2 peripheral neuropathy and grade 2 hand-foot-syndrome (HFS) are  
44 separately reported as these are specifically associated with diminished function. The  
45 incidence of grade 2 neuropathy was seen in 5 (7%), 11 (7%) and 2 (6%) patients in the low,  
46 intermediate and high-risk categories, respectively. There was no significant difference in  
47 grade 2 neuropathy amongst the CARG risk groups ( $p=0.97$ ). The incidence of grade 2 HFS  
48 was seen in 5 (7%), 18 (11%) and 2 (6%) patients in the low, intermediate and high-risk  
49 categories, respectively. There was no significant difference in grade 2 HFS amongst the  
50 CARG risk groups ( $p=0.47$ )  
51  
52  
53  
54  
55  
56  
57  
58  
59  
60

1  
2  
3 Upfront dose modifications in chemotherapy regimens were performed in 65 patients (24%).  
4  
5 Subsequent dose reductions were made in 89 patients (33%). On further analysis, these  
6  
7 subsequent dose modifications were made in 18 (25%), 59 (36%) and 12 (35%) patients in  
8  
9 the low, intermediate and high-risk categories, respectively. The differences in proportion of  
10  
11 dose modifications were not statistically significant between the 3 groups ( $p=0.244$ ).  
12  
13  
14

### 15 Association of grade 3-5 toxicity with Age adjusted Charlson 16 Comorbidity Index (ACCI) and ECOG PS 17 18

19  
20 The median ACCI was 5. A  $CCI \leq 4$  was seen in 111 patients (41%), while 159 patients  
21  
22 (59%) had a  $CCI > 4$ . There was no significant difference in toxicities amongst both groups  
23  
24 of patients ( $p=0.7$ ) (figure 1 and table 3). The ROC of the model with CCI (as a continuous  
25  
26 variable) was 0.48 (95% CI: 0.41-0.55), which was lower than the ROC of the CARG risk  
27  
28 score model, 0.63.  
29  
30

31  
32 ECOG PS was 0, 1 and 2 in 9(3%), 221(82%) and 40 (15%) patients, respectively. There was  
33  
34 no significant difference in toxicities amongst both groups of patients ( $p=0.69$ ) (figure 1 and  
35  
36 table 3). The ROC of the model with ECOG PS (as a continuous variable) was 0.52 (95% CI:  
37  
38 0.45-0.59), which was lower than the ROC of the CARG risk score model, 0.63.  
39  
40  
41

### 42 Discussion 43 44 45 46

47 This study validates the CARG risk score in older Indian patients receiving curative-intent  
48  
49 chemotherapy for stage I-III gastrointestinal, breast and gynecological cancers, though the  
50  
51 association between rates of severe chemotherapy toxicity and CARG risk groups as being  
52  
53 discriminatory was modest (AU-ROC 0.63). No association was found between ECOG PS  
54  
55 and burden of comorbidities as measured by the ACCI with severe chemotherapy related  
56  
57 toxicities.  
58  
59  
60

1  
2  
3 There is a significant knowledge gap in terms of how older patients in general and older  
4 patients with cancer fare in the Indian scenario. Limited data suggests no defined care  
5 structure for older patients with cancer in India as well as only low-moderate awareness and  
6 use of geriatric assessment in older patients with cancer (3,12) . Available evidence from  
7 India suggests that 98% of older adult cancer patients have vulnerabilities in at least one  
8 geriatric domain, though the specific vulnerabilities appear to differ from previously  
9 published data (13). Such a high and differential vulnerability profile in these patients  
10 suggests that they may have a different incidence of toxicities with standard chemotherapy  
11 regimens. With such a background, it was essential to evaluate the validity of the CARG risk  
12 score before routine advocacy in older adult patients.  
13  
14  
15  
16  
17  
18  
19  
20  
21  
22  
23  
24  
25  
26

27 There are some important differences between the populations of the current study and the  
28 seminal CARG study. The current study had only patients with stage I-III disease, while the  
29 CARG study had 38% with non-metastatic disease. Other relevant differences between the  
30 cohorts include a younger mean age (69 vs. 73 years), lesser comorbidities (46% with no  
31 comorbidities vs. 10% with no comorbidities), and better performance on a number of  
32 individual variables in the CARG risk score (better hearing, lesser number of falls, better  
33 social activity and effort tolerance). There were also a lower proportion of patients with high-  
34 risk score in the current study (13% vs. 22%). These differences, coupled with lack of  
35 patients with metastatic disease in the study cohort, indicate that patients in the current study  
36 were a well preserved and presumably fitter group of patients with lesser disease burden and  
37 potential for toxicities.  
38  
39  
40  
41  
42  
43  
44  
45  
46  
47  
48  
49  
50  
51  
52

53 Despite the differences in patient cohorts in terms of baseline characteristics, the current  
54 study validated the Cancer Aging Research Group (CARG) risk score in predicting grade 3 to  
55 grade 5 chemotherapy related toxicities. The low, intermediate and high risk CARG groups  
56 predicted for increasing incidences of grade 3-5 toxicities with statistical significance. The  
57  
58  
59  
60

1  
2  
3 odds ratios between individual risk groups for predicting grade 3-5 toxicity was also  
4  
5 statistically significant, highlighting the differential capability of the risk score. An  
6  
7 unanswered component of the CARG risk assessment was whether it correlated with grade 1-  
8  
9 2 toxicities. Previous studies by Moth et al estimating grade 1 and grade 2 toxicities as  
10  
11 toxicity burden have not shown a correlation with the CARG risk score (14). This is possibly  
12  
13 due to the near universal occurrence of such toxicities in patients receiving chemotherapy. A  
14  
15 similar trend was seen in the current study wherein an increasing risk score did not predict for  
16  
17 an increased risk of grade 1-2 toxicities. Additionally, in comparison to the predictive  
18  
19 capacity of the CARG risk score, the Charlson Comorbidity Index and ECOG PS based risk  
20  
21 groups did not predict for incidences of toxicity in the study. These results highlight certain  
22  
23 salient points in the study, Firstly, the CARG risk score can be used with confidence in the  
24  
25 Indian population to predict for grade 3-5 toxicity. The CARG risk score was evaluated only  
26  
27 in a North American elderly adult cohort initially and the current study provides validation  
28  
29 for the score in the Indian context. Secondly, despite being a better-preserved cohort in  
30  
31 comparison to the population in the seminal study as well as having only patients on curative  
32  
33 intent therapy, a high proportion of patients across risk groups developed grade 3-5 toxicity  
34  
35 which may be life-threatening. Thus, it is imperative to carefully assess the trade-off between  
36  
37 objectives such as survival and downstaging versus potentially life-threatening toxicities  
38  
39 while planning curative intent chemotherapy in older adult patients. Thirdly, the area under  
40  
41 the ROC for the current study was 0.63 and is lower in comparison to the original study  
42  
43 (0.72), though very similar to the results of the validation study (0.65) by the CARG group  
44  
45 (8). Though this indicates a modest discriminatory capability for the CARG risk score in the  
46  
47 current study, it is probably also reflective of the true value of the score in prediction of  
48  
49 severe chemotherapy related toxicities. Smaller studies by Australian investigators have also  
50  
51 previously commented on this lack of discriminatory value with the CARG risk score (14).  
52  
53  
54  
55  
56  
57  
58  
59  
60



1  
2  
3 Finally, using a global assessment score such as ECOG PS or only one aspect of an  
4 assessment profile such as comorbidity status (as in the case of ACCI) would not accurately  
5 capture the heterogeneity of the older adult population. This is reflected in the inadequacy of  
6 ECOG PS and ACCI in predicting for toxicities and hence, these indices should only be used  
7 in conjunction with other indices as measures of assessment in older adults with cancer  
8 (15,16).  
9  
10  
11  
12  
13  
14  
15  
16

17 We also attempted to correlate the CARG risk scores with the necessity for further dose  
18 reductions during chemotherapy. There were no statistically significant differences between  
19 the risk groups in terms of requirement for subsequent dose modifications post initiation of  
20 therapy. This can partially be explained by the fact that a high proportion of patients (24%)  
21 underwent initial dose reductions when planned for therapy by the treating physicians who  
22 were blinded to the CARG risk score. Such an upfront dose reduction may have masked any  
23 possible correlation between the risk scores and need for dose modifications during  
24 chemotherapy.  
25  
26  
27  
28  
29  
30  
31  
32  
33  
34  
35

36 Certain strengths of the current study need to be highlighted. The prospective collection of  
37 toxicity data removes any recall bias that may lead to underestimation of the same. The  
38 assessment in patients undergoing curative intent treatment only is novel and lays stress on  
39 the conundrum faced by oncologists when balancing risks and benefits of using potentially  
40 aggressive chemotherapy regimens in the neoadjuvant or adjuvant setting. The results will  
41 allow patients and oncologists to discuss options with evidentiary basis for expected toxicities  
42 when treatment regimens are considered. By validating the CARG risk score in an Indian  
43 population, the study provides further evidence for the use of the score across geographical  
44 regions.  
45  
46  
47  
48  
49  
50  
51  
52  
53  
54  
55  
56  
57  
58  
59  
60

1  
2  
3 There are certain limitations to this study. This is a single centre study and the results may not  
4 be generalizable to practice across India. There is an under-representation of non-  
5 gastrointestinal cancers and this may hamper the generalization of the study results to all  
6  
7 solid tumors. Additionally, other common solid tumors like lung cancers, head and neck  
8  
9 cancers and genitourinary cancers have not been evaluated in this study. The rate of grade 3-5  
10  
11 toxicities was much higher than planned as per baseline statistical considerations – this may  
12  
13 relate to the preponderance of GI cancers in the study population, besides other differences in  
14  
15 baseline characteristics of the patient cohorts as has been previously discussed. Additionally,  
16  
17 while information with regard to correlation of the CARG risk score with grade 1-2 toxicities  
18  
19 has been provided, the relevance of this is limited due to the fact that almost all patients on  
20  
21 systemic therapy develop some grade 1 or 2 toxicity. Again, the CARG score was developed  
22  
23 to predict for grade 3-5 toxicities, not grade 1-2 toxicities and thus, the inability to  
24  
25 differentially predict for Grade 1-2 in the current study is not surprising . We also do not  
26  
27 have information on patient related outcomes in the study.  
28  
29  
30  
31  
32  
33

34  
35  
36 Going forward, future directions with regard to the CARG risk assessment include  
37  
38 developing paradigms for the degree of dose modifications required in patients based on the  
39  
40 score. Patients preferences with regard to tumor related endpoints versus toxicity limiting  
41  
42 QOL based on toxicity risk assessment can be explored in trials, especially in the advanced  
43  
44 cancer setting. Non-chemotherapeutic systemic treatment options like targeted therapy and  
45  
46 immunotherapy can be assessed by the risk score for predicting toxicity. Based on the current  
47  
48 study, we plan to use the CARG score routinely in our hospital as well plan prospective  
49  
50 studies utilizing the score to estimate dose modifications in relation to risk assessment by the  
51  
52 score.  
53  
54  
55

56  
57 In conclusion, the current study validates the CARG risk score in predicting for grade 3-5  
58  
59 toxicities in Indian older adult cancer patients receiving curative intent chemotherapy. The  
60

score contributes to informed clinical decision making with regard to planning treatment and expectation of toxicity in this cohort of patients. Additionally, indices such as ECOG PS and Charlson Comorbidity Index are inadequate to predict for toxicities and should only be used along with other measures to predict for chemotherapy related toxicities.

### References :

1. Marosi C, Köller M. Challenge of cancer in the elderly. *ESMO Open*. 2016 Apr 1;1(3): e000020.
2. Jemal A, Siegel R, Xu J, Ward E. Cancer statistics, 2010. *CA Cancer J Clin*. 2010 Oct;60(5):277–300.
3. Patil VM, Chakraborty S, Dessai S, Kumar SS, Ratheesan K, Bindu T, et al. Patterns of care in geriatric cancer patients – An audit from a rural based hospital cancer registry in Kerala. *Indian J Cancer*. 2015 Jan 1;52(1):157.
4. Zhao L, Leung L-H, Wang J, Li H, Che J, Liu L, et al. Association between Charlson comorbidity index score and outcome in patients with stage IIIB-IV non-small cell lung cancer. *BMC Pulm Med* [Internet]. 2017 Aug 15 [cited 2020 Jun 17];17. Available from: <https://www.ncbi.nlm.nih.gov/pmc/articles/PMC5556668/>
5. Edahyr B, Lind M, Karsera L, Mafi R, Wallace K, Howell G, et al. PUB068 The Applicability of Comorbidity Indices in Predicting Chemo toxicity in Non-Small Cell Lung Cancer. *J Thorac Oncol*. 2017 Jan 1;12(1): S1487–8.
6. van Abbema DL, van den Akker M, Janssen-Heijnen ML, van den Berkmortel F, Hoeben A, de Vos-Geelen J, et al. Patient- and tumor-related predictors of chemotherapy intolerance in older patients with cancer: A systematic review. *J Geriatr Oncol*. 2019 Jan 1;10(1):31–41.

- 1  
2  
3 7. Hurria A, Togawa K, Mohile SG, Owusu C, Klepin HD, Gross CP, et al. Predicting  
4  
5  
6  
7  
8  
9  
10  
11  
12  
13  
14  
15  
16  
17  
18  
19  
20  
21  
22  
23  
24  
25  
26  
27  
28  
29  
30  
31  
32  
33  
34  
35  
36  
37  
38  
39  
40  
41  
42  
43  
44  
45  
46  
47  
48  
49  
50  
51  
52  
53  
54  
55  
56  
57  
58  
59  
60  
11. Yang C-C, Fong Y, Lin L-C, Que J, Ting W-C, Chang C-L, et al. The age-adjusted  
Charlson comorbidity index is a better predictor of survival in operated lung cancer patients  
than the Charlson and Elixhauser comorbidity indices. *Eur J Cardiothorac Surg*. 2018 Jan  
1;53(1):235–40.
12. Noronha V, Talreja V, Joshi A, Patil V, Prabhash K. Survey for geriatric assessment  
in practicing oncologists in India. *Cancer Res Stat Treat*. 2019 Jul 1;2(2):232.
13. Noronha V, Ramaswamy A, Dhekle R, Talreja V, Gota V, Gawit K, et al. Initial  
experience of a geriatric oncology clinic in a tertiary cancer center in India. *Cancer Res Stat  
Treat*. 2020 Jul 1;3(2):208.
14. Moth EB, Kiely BE, Stefanic N, Naganathan V, Martin A, Grimison P, et al.  
Predicting chemotherapy toxicity in older adults: Comparing the predictive value of the

CARG Toxicity Score with oncologists' estimates of toxicity based on clinical judgement. *J Geriatr Oncol.* 2019;10(2):202–9.

15. Extermann M, Boler I, Reich RR, Lyman GH, Brown RH, DeFelice J, et al. Predicting the risk of chemotherapy toxicity in older patients: The Chemotherapy Risk Assessment Scale for High-Age Patients (CRASH) score. *Cancer.* 2012;118(13):3377–86.

16. Zhang J, Liao X, Feng J, Yin T, Liang Y. Prospective comparison of the value of CRASH and CARG toxicity scores in predicting chemotherapy toxicity in geriatric oncology. *Oncol Lett.* 2019 Oct 31;18(5):4947–55.

### **Figure legends:**

Figure 1- CARG (A) vs. (B) ACCI vs. (C) ECOG PS predict Grade 3 to 5 toxicity

### **Tables**

Table 1 - Baseline characteristics of patients

| Characteristic            | Current study<br>Number (%)<br>(n=270) | CARG<br>training<br>cohort<br>(n=500) |
|---------------------------|----------------------------------------|---------------------------------------|
| Mean age in years (range) | 69 (65-83)                             | 73 (65-91)                            |
| Gender                    |                                        |                                       |
| • Female                  | 121 (45)                               | 281 (56)                              |
| • Male                    | 149 (55)                               | 219 (44)                              |

|                                                                                                                                                                                                                                                                                                                                                                                                                                                                                                                                                                                                                                               |                                                                                                                                                                   |                                                                                                                                                                           |
|-----------------------------------------------------------------------------------------------------------------------------------------------------------------------------------------------------------------------------------------------------------------------------------------------------------------------------------------------------------------------------------------------------------------------------------------------------------------------------------------------------------------------------------------------------------------------------------------------------------------------------------------------|-------------------------------------------------------------------------------------------------------------------------------------------------------------------|---------------------------------------------------------------------------------------------------------------------------------------------------------------------------|
| Comorbidities                                                                                                                                                                                                                                                                                                                                                                                                                                                                                                                                                                                                                                 |                                                                                                                                                                   |                                                                                                                                                                           |
| <ul style="list-style-type: none"> <li>Hypertension</li> <li>Diabetes mellitus</li> <li>Coronary artery disease</li> <li>Chronic kidney disease</li> </ul>                                                                                                                                                                                                                                                                                                                                                                                                                                                                                    | <p>114 (42)</p> <p>71 (26)</p> <p>12 (4)</p> <p>3 (1)</p>                                                                                                         | <p>52%</p> <p>-</p> <p>20%</p> <p>-</p>                                                                                                                                   |
| Number of comorbidities                                                                                                                                                                                                                                                                                                                                                                                                                                                                                                                                                                                                                       |                                                                                                                                                                   |                                                                                                                                                                           |
| <ul style="list-style-type: none"> <li>0</li> <li>1</li> <li>&gt;=2</li> </ul>                                                                                                                                                                                                                                                                                                                                                                                                                                                                                                                                                                | <p>125 (46)</p> <p>95 (35)</p> <p>50 (19)</p>                                                                                                                     | <p>10%</p> <p>-</p> <p>-</p>                                                                                                                                              |
| Cancer stage                                                                                                                                                                                                                                                                                                                                                                                                                                                                                                                                                                                                                                  |                                                                                                                                                                   |                                                                                                                                                                           |
| <ul style="list-style-type: none"> <li>Stage I-III</li> </ul>                                                                                                                                                                                                                                                                                                                                                                                                                                                                                                                                                                                 | 270 (100)                                                                                                                                                         | 191 (38)                                                                                                                                                                  |
| Undergone resection                                                                                                                                                                                                                                                                                                                                                                                                                                                                                                                                                                                                                           | 210 (78)                                                                                                                                                          | -                                                                                                                                                                         |
| ECOG performance status (clinician assessed)                                                                                                                                                                                                                                                                                                                                                                                                                                                                                                                                                                                                  |                                                                                                                                                                   |                                                                                                                                                                           |
| <ul style="list-style-type: none"> <li>0/1</li> <li>2</li> </ul>                                                                                                                                                                                                                                                                                                                                                                                                                                                                                                                                                                              | <p>230 (85)</p> <p>40 (15)</p>                                                                                                                                    | <p>402 (80) *</p> <p>86 (17) **</p>                                                                                                                                       |
| Factors assessed in CARG                                                                                                                                                                                                                                                                                                                                                                                                                                                                                                                                                                                                                      |                                                                                                                                                                   |                                                                                                                                                                           |
| <ul style="list-style-type: none"> <li>Age <math>\geq</math> 72 years</li> <li>Cancer type GI or GU</li> <li>Chemotherapy dosing, standard dose</li> <li>No. of chemotherapy drugs, polychemotherapy</li> <li>Hemoglobin &lt; 11 g/dL (male), &lt; 10 g/dL (female)</li> <li>Creatinine clearance &lt; 34 mL/min</li> <li>Hearing, fair or worse</li> <li>No. of falls in last 6 months, 1 or more</li> <li>IADL: Taking medications, with some help/unable</li> <li>MOS: Walking 1 block, somewhat limited/limited a lot</li> <li>MOS: Decreased social activity because of physical/emotional health, limited at least sometimes</li> </ul> | <p>60 (22)</p> <p>212 (79)</p> <p>205 (76)</p> <p>194 (72)</p> <p>99 (37)</p> <p>5 (2)</p> <p>19 (7)</p> <p>18 (7)</p> <p>29 (11)</p> <p>17 (6)</p> <p>18 (7)</p> | <p>270 (54)</p> <p>185 (37)</p> <p>380 (76)</p> <p>351 (70)</p> <p>62 (12)</p> <p>44 (9)</p> <p>123 (25)</p> <p>91 (18)</p> <p>39 (8)</p> <p>109 (22)</p> <p>218 (44)</p> |
| Median overall risk score                                                                                                                                                                                                                                                                                                                                                                                                                                                                                                                                                                                                                     | 6                                                                                                                                                                 | 7                                                                                                                                                                         |
| Risk stratification                                                                                                                                                                                                                                                                                                                                                                                                                                                                                                                                                                                                                           |                                                                                                                                                                   |                                                                                                                                                                           |
| <ul style="list-style-type: none"> <li>Low risk (0-5 points)</li> <li>Intermediate risk (6-9 points)</li> <li>High risk (10-19 points)</li> </ul>                                                                                                                                                                                                                                                                                                                                                                                                                                                                                             | <p>72 (27)</p> <p>164 (61)</p> <p>34 (13)</p>                                                                                                                     | <p>128 (26)</p> <p>227 (45)</p> <p>109 (22)</p>                                                                                                                           |
| Age adjusted Charlson's Comorbidity Index                                                                                                                                                                                                                                                                                                                                                                                                                                                                                                                                                                                                     |                                                                                                                                                                   |                                                                                                                                                                           |
| <ul style="list-style-type: none"> <li><math>\leq</math>4</li> <li>&gt;4</li> </ul>                                                                                                                                                                                                                                                                                                                                                                                                                                                                                                                                                           | <p>111(41)</p> <p>159(59)</p>                                                                                                                                     | <p>-</p> <p>-</p>                                                                                                                                                         |

\*equivalent to KPS $\geq$ 80; \*\* equivalent to KPS 60-70

Table 2 – Treatment related Grade 3 – grade 5 toxicities

| Toxicity type             | Grade 3 (%) | Grade 4 (%) | Grade 5 (%) |
|---------------------------|-------------|-------------|-------------|
| Haematological            |             |             |             |
| Anemia                    | 14 (5)      | 0           | 0           |
| Neutropenia               | 18 (7)      | 8(3)        | 0           |
| Thrombocytopenia          | 6 (2)       | 1 (0.4)     | 0           |
| Febrile neutropenia       | 12 (4)      | 2 (0.7)     | 3(1)        |
| Cumulative haematological | 46 (17)     | 11 (4)      | 3(1)        |
| Non-haematological        |             |             |             |
| Diarrhoea                 | 16 (6)      | 4 (2)       | 3(1) *      |
| Vomiting                  | 12 (4)      | 1(0.4)      | 1(0.3) **   |
| Mucositis                 | 10 (4)      | 0           |             |
| Constipation              | 1 (0.4)     | 0           |             |
| Hand-foot-syndrome        | 1 (0.4)     | -           |             |

|                               |         |         |       |
|-------------------------------|---------|---------|-------|
| Neuropathy                    | 3 (1)   | -       |       |
| Infection with normal ANC     | 47 (17) | 7(3)    |       |
| Hyponatremia                  | 8 (3)   | 2 (0.7) |       |
| Fatigue                       | 24 (9)  | -       |       |
| Sudden cardiac death          |         |         | 4(1)  |
| Cumulative non-haematological | 99(37)  | 13(5)   | 8(3)  |
| Cumulative (all toxicities)   | 119(44) | 22(8)   | 11(4) |

\*All 3 patients developed dehydration with resulting acute renal failure. \*\*Patient developed grade 4 vomiting with irreversible grade 4 hyponatremia resulting in death

Table 3 - Ability of CARG Risk Score Versus Physician assessed ECOG PS Versus Age adjusted Charlson's Comorbidity Index (ACCI) to Predict Grade 3-5 Chemotherapy Toxicity

| Risk Stratification        | No toxicity |    | Toxicity |    | p value |
|----------------------------|-------------|----|----------|----|---------|
|                            | Number      | %  | Number   | %  |         |
| CARG risk score            |             |    |          |    | 0.001   |
| • Low                      | 42          | 58 | 30       | 42 |         |
| • Intermediate             | 81          | 49 | 83       | 51 |         |
| • High                     | 7           | 21 | 27       | 79 |         |
| Physician assessed ECOG PS |             |    |          |    | 0.69    |
| • 0                        | 5           | 56 | 4        | 44 |         |
| • 1                        | 108         | 49 | 113      | 51 |         |
| • 2                        | 17          | 43 | 23       | 57 |         |



|                                           |    |    |    |    |     |
|-------------------------------------------|----|----|----|----|-----|
| Age adjusted Charlson's Comorbidity Index |    |    |    |    |     |
| • ≤4                                      | 55 | 50 | 56 | 50 | 0.7 |
| • >4                                      | 75 | 47 | 84 | 53 |     |

For peer review only

Figure 1 – Ability of CARG risk score (A) versus (B) Age adjusted Charlson Comorbidity Index (ACCI) versus (C) ECOG Performance Status Index to predict Grade 3 to 5 chemotherapy toxicity.

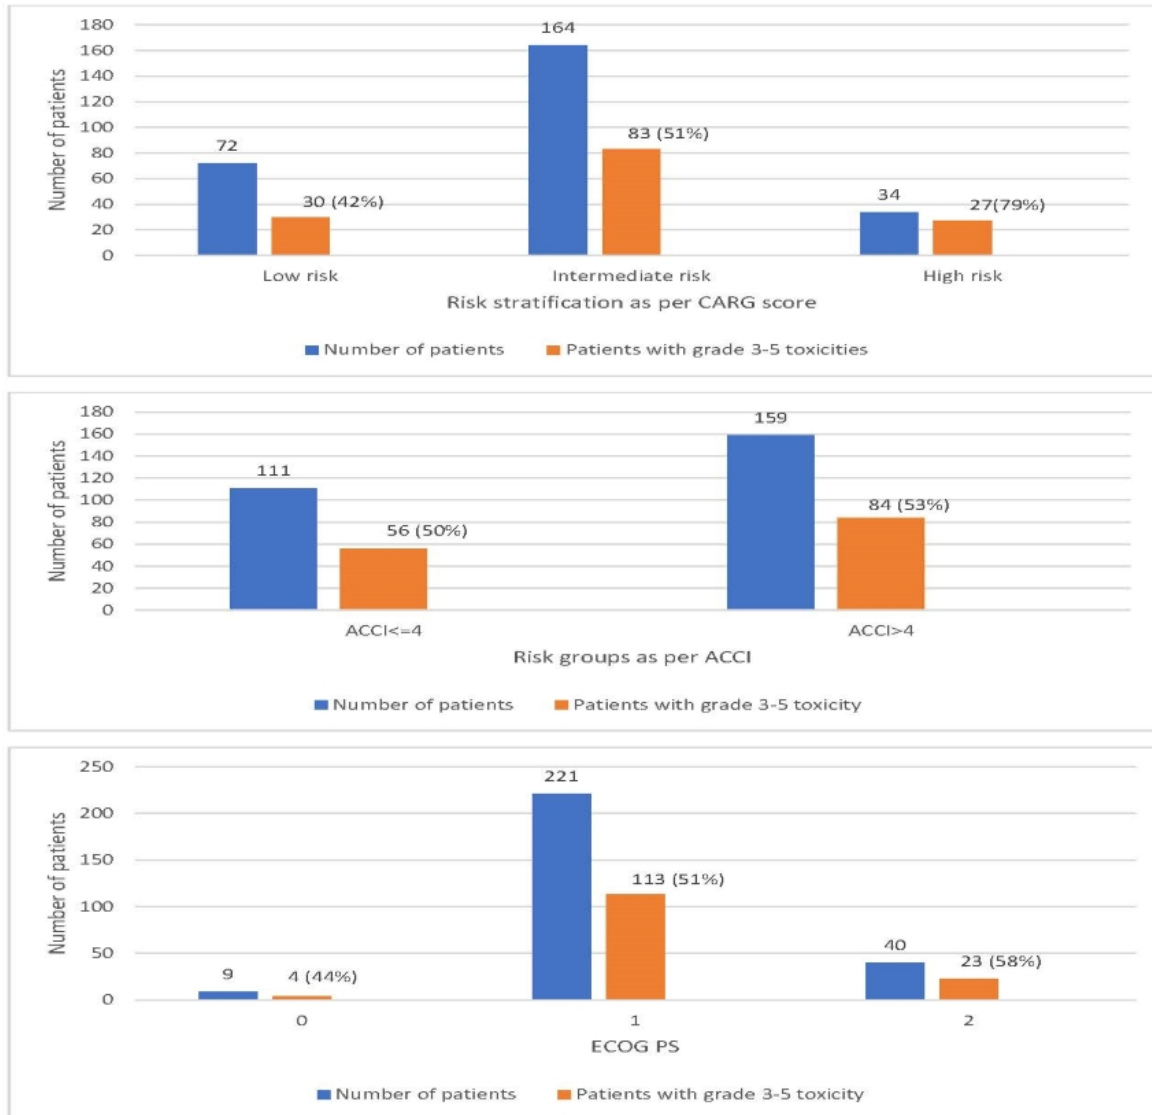

Supplementary table 1 – Details of chemotherapy

| Chemotherapy regimens                                | Number (percentage) |
|------------------------------------------------------|---------------------|
| <b>Platinum containing regimens</b>                  | <b>159(59)</b>      |
| Oxaliplatin containing regimens                      | 123 (46)            |
| • Docetaxel-Oxaliplatin- 5 -fluorouracil             | 50 (19)             |
| • Capecitabine-Oxaliplatin                           | 26 (10)             |
| • 5-fluorouracil - leucovorin-oxaliplatin            | 33 (12)             |
| • 5-fluorouracil - leucovorin-oxaliplatin-irinotecan | 1 (0.4)             |
| • Epirubicin- Capecitabine-Oxaliplatin               | 10 (4)              |
| • Gemcitabine-Oxaliplatin                            | 2 (1)               |
| • Epirubicin- Oxaliplatin - 5-fluorouracil           | 1 (0.4)             |
| Cisplatin containing regimens                        | 19(7)               |
| • Gemcitabine-Cisplatin                              | 19 (7)              |
| Carboplatin containing regimens                      | 17 (6)              |
| • Paclitaxel- Carboplatin                            | 6 (2)               |
| • Carboplatin monotherapy                            | 11 (4)              |
| <b>Non-Platinum containing regimens</b>              | <b>111(41)</b>      |
| • Epirubicin – Cyclophosphamide                      | 9 (3)               |
| • Adriamycin – Cyclophosphamide                      | 19 (7)              |
| • Docetaxel – Cyclophosphamide                       | 1 (0.4)             |
| • Cyclophosphamide-methotrexate – 5-fluorouracil     | 1 (0.4)             |
| • 5-fluorouracil/leucovorin monotherapy              | 10 (4)              |
| • Capecitabine monotherapy                           | 25 (9)              |
| • Gemcitabine monotherapy                            | 26 (10)             |
| • Paclitaxel - Trastuzumab                           | 9 (3)               |
| • Paclitaxel monotherapy                             | 3 (1)               |
| • Docetaxel - 5-fluorouracil                         | 5 (2)               |
| • Gemcitabine- nab-Paclitaxel                        | 2 (1)               |
| • Gemcitabine Capecitabine                           | 1 (0.4)             |
| Chemotherapy timing                                  |                     |
| • Neoadjuvant                                        | 5 (2)               |

1  
2  
3  
4  
5  
6  
7  
8  
9  
10  
11  
12  
13  
14  
15  
16  
17  
18  
19  
20  
21  
22  
23  
24  
25  
26  
27  
28  
29  
30  
31  
32  
33  
34  
35  
36  
37  
38  
39  
40  
41  
42  
43  
44  
45  
46  
47  
48  
49  
50  
51  
52  
53  
54  
55  
56  
57  
58  
59  
60

|                                            |          |
|--------------------------------------------|----------|
| • Adjuvant                                 | 178 (66) |
| • Perioperative (neoadjuvant and adjuvant) | 87 (32)  |

Supplementary table 2 – Treatment- related Grade 1 – grade 2 toxicities

| Toxicity type                | Grade 1/2 toxicities (%) |
|------------------------------|--------------------------|
| Hematological                |                          |
| Anemia                       | 148(55)                  |
| Neutropenia                  | 52(19)                   |
| Cumulative hematological     | 160(59)                  |
| Non-hematological            |                          |
| Diarrhoea                    | 131(49)                  |
| Vomiting                     | 140(52)                  |
| Mucositis                    | 57(21)                   |
| Constipation                 | 41(15)                   |
| Hand-foot-syndrome           | 59(22)                   |
| Neuropathy                   | 75(28)                   |
| Hyponatremia                 | 17(6)                    |
| Fatigue                      | 197(73)                  |
| Cumulative non-hematological | 230(85)                  |
| Cumulative (all toxicities)  | 234(87)                  |

Supplementary table 3 - Ability of individual factors in the CARG risk score to predict for Grade 3 to 5 toxicities

| Risk factor                                                                                     | Prevalence |    | Toxicity |    | p value | OR (95% CI)       |
|-------------------------------------------------------------------------------------------------|------------|----|----------|----|---------|-------------------|
|                                                                                                 | Number     | %  | Number   | %  |         |                   |
| Age $\geq$ 72 years                                                                             | 60         | 22 | 34       | 57 | 0.4     | 1.28 (0.72-2.29)  |
| Cancer type (GI or GU)                                                                          | 212        | 79 | 116      | 55 | 0.07    | 1.71 (0.95-3.08)  |
| Chemotherapy dosing, standard dose                                                              | 201        | 74 | 101      | 50 | 0.37    | 0.77 (0.45-1.35)  |
| Polychemotherapy                                                                                | 194        | 72 | 106      | 55 | 0.14    | 1.48 (0.87-2.54)  |
| Hemoglobin $<$ 11 gm% (male), $<$ 10 gm% (female)                                               | 99         | 37 | 65       | 66 | 0.001   | 2.45(1.47-4.09)   |
| Creatinine clearance $<$ 34ml/min                                                               | 5          | 2  | 3        | 60 | 0.71    | 1.4(0.23-8.52)    |
| Hearing, fair or worse                                                                          | 19         | 7  | 10       | 53 | 0.94    | 1.03(0.41-2.63)   |
| No. of falls in last 6 months, $\geq$ 1                                                         | 18         | 7  | 10       | 56 | 0.75    | 1.17(0.45-3.07)   |
| IADL, taking medications, with some help/unable                                                 | 29         | 11 | 17       | 59 | 0.44    | 1.336 (0.62-2.97) |
| MOS, walking 1 block equivalent, somewhat limited/limited a lot                                 | 17         | 6  | 11       | 65 | 0.27    | 1.76 (0.63-4.91)  |
| MOS, decreased social activity because of physical/emotional health, limited at least sometimes | 18         | 7  | 12       | 67 | 0.19    | 1.94(0.71-5.32)   |

**STROBE 2007 (v4) Statement—Checklist of items that should be included in reports of *cohort studies***

| Section/Topic                | Item # | Recommendation                                                                                                                                                                       | Reported on page # |
|------------------------------|--------|--------------------------------------------------------------------------------------------------------------------------------------------------------------------------------------|--------------------|
| <b>Title and abstract</b>    | 1      | (a) Indicate the study's design with a commonly used term in the title or the abstract                                                                                               | 1                  |
|                              |        | (b) Provide in the abstract an informative and balanced summary of what was done and what was found                                                                                  | 6                  |
| <b>Introduction</b>          |        |                                                                                                                                                                                      |                    |
| Background/rationale         | 2      | Explain the scientific background and rationale for the investigation being reported                                                                                                 | 9                  |
| Objectives                   | 3      | State specific objectives, including any prespecified hypotheses                                                                                                                     | 10                 |
| <b>Methods</b>               |        |                                                                                                                                                                                      |                    |
| Study design                 | 4      | Present key elements of study design early in the paper                                                                                                                              | 10                 |
| Setting                      | 5      | Describe the setting, locations, and relevant dates, including periods of recruitment, exposure, follow-up, and data collection                                                      | 10                 |
| Participants                 | 6      | (a) Give the eligibility criteria, and the sources and methods of selection of participants. Describe methods of follow-up                                                           | 10                 |
|                              |        | (b) For matched studies, give matching criteria and number of exposed and unexposed                                                                                                  | 10                 |
| Variables                    | 7      | Clearly define all outcomes, exposures, predictors, potential confounders, and effect modifiers. Give diagnostic criteria, if applicable                                             | 11                 |
| Data sources/<br>measurement | 8*     | For each variable of interest, give sources of data and details of methods of assessment (measurement). Describe comparability of assessment methods if there is more than one group | 11                 |
| Bias                         | 9      | Describe any efforts to address potential sources of bias                                                                                                                            | 12                 |
| Study size                   | 10     | Explain how the study size was arrived at                                                                                                                                            | 12                 |
| Quantitative variables       | 11     | Explain how quantitative variables were handled in the analyses. If applicable, describe which groupings were chosen and why                                                         | 12                 |
| Statistical methods          | 12     | (a) Describe all statistical methods, including those used to control for confounding                                                                                                | 12                 |
|                              |        | (b) Describe any methods used to examine subgroups and interactions                                                                                                                  | 12                 |
|                              |        | (c) Explain how missing data were addressed                                                                                                                                          | 12                 |
|                              |        | (d) If applicable, explain how loss to follow-up was addressed                                                                                                                       |                    |
|                              |        | (e) Describe any sensitivity analyses                                                                                                                                                |                    |
| <b>Results</b>               |        |                                                                                                                                                                                      | 13                 |

|                          |     |                                                                                                                                                                                                              |    |
|--------------------------|-----|--------------------------------------------------------------------------------------------------------------------------------------------------------------------------------------------------------------|----|
| Participants             | 13* | (a) Report numbers of individuals at each stage of study—eg numbers potentially eligible, examined for eligibility, confirmed eligible, included in the study, completing follow-up, and analysed            | 13 |
|                          |     | (b) Give reasons for non-participation at each stage                                                                                                                                                         | 13 |
|                          |     | (c) Consider use of a flow diagram                                                                                                                                                                           |    |
| Descriptive data         | 14* | (a) Give characteristics of study participants (eg demographic, clinical, social) and information on exposures and potential confounders                                                                     | 13 |
|                          |     | (b) Indicate number of participants with missing data for each variable of interest                                                                                                                          | 13 |
|                          |     | (c) Summarise follow-up time (eg, average and total amount)                                                                                                                                                  | 13 |
| Outcome data             | 15* | Report numbers of outcome events or summary measures over time                                                                                                                                               | 14 |
| Main results             | 16  | (a) Give unadjusted estimates and, if applicable, confounder-adjusted estimates and their precision (eg, 95% confidence interval). Make clear which confounders were adjusted for and why they were included | 14 |
|                          |     | (b) Report category boundaries when continuous variables were categorized                                                                                                                                    |    |
|                          |     | (c) If relevant, consider translating estimates of relative risk into absolute risk for a meaningful time period                                                                                             |    |
| Other analyses           | 17  | Report other analyses done—eg analyses of subgroups and interactions, and sensitivity analyses                                                                                                               | 14 |
| <b>Discussion</b>        |     |                                                                                                                                                                                                              |    |
| Key results              | 18  | Summarise key results with reference to study objectives                                                                                                                                                     | 15 |
| <b>Limitations</b>       |     |                                                                                                                                                                                                              |    |
| Interpretation           | 20  | Give a cautious overall interpretation of results considering objectives, limitations, multiplicity of analyses, results from similar studies, and other relevant evidence                                   | 18 |
| Generalisability         | 21  | Discuss the generalisability (external validity) of the study results                                                                                                                                        | 17 |
| <b>Other information</b> |     |                                                                                                                                                                                                              |    |
| Funding                  | 22  | Give the source of funding and the role of the funders for the present study and, if applicable, for the original study on which the present article is based                                                | 5  |

\*Give information separately for cases and controls in case-control studies and, if applicable, for exposed and unexposed groups in cohort and cross-sectional studies.

**Note:** An Explanation and Elaboration article discusses each checklist item and gives methodological background and published examples of transparent reporting. The STROBE checklist is best used in conjunction with this article (freely available on the Web sites of PLoS Medicine at <http://www.plosmedicine.org/>, Annals of Internal Medicine at <http://www.annals.org/>, and Epidemiology at <http://www.epidem.com/>). Information on the STROBE Initiative is available at [www.strobe-statement.org](http://www.strobe-statement.org).



# BMJ Open

## Cancer Ageing Research Group (CARG) score in older adults undergoing curative intent chemotherapy: A prospective cohort study

|                                 |                                                                                                                                                                                                                                                                                                                                                                                                                                                                                                                                                                                                                                                                                                                                                                                                                                                                                                                                                                                                                                                                                                                                                                                                                                 |
|---------------------------------|---------------------------------------------------------------------------------------------------------------------------------------------------------------------------------------------------------------------------------------------------------------------------------------------------------------------------------------------------------------------------------------------------------------------------------------------------------------------------------------------------------------------------------------------------------------------------------------------------------------------------------------------------------------------------------------------------------------------------------------------------------------------------------------------------------------------------------------------------------------------------------------------------------------------------------------------------------------------------------------------------------------------------------------------------------------------------------------------------------------------------------------------------------------------------------------------------------------------------------|
| Journal:                        | <i>BMJ Open</i>                                                                                                                                                                                                                                                                                                                                                                                                                                                                                                                                                                                                                                                                                                                                                                                                                                                                                                                                                                                                                                                                                                                                                                                                                 |
| Manuscript ID                   | bmjopen-2020-047376.R2                                                                                                                                                                                                                                                                                                                                                                                                                                                                                                                                                                                                                                                                                                                                                                                                                                                                                                                                                                                                                                                                                                                                                                                                          |
| Article Type:                   | Original research                                                                                                                                                                                                                                                                                                                                                                                                                                                                                                                                                                                                                                                                                                                                                                                                                                                                                                                                                                                                                                                                                                                                                                                                               |
| Date Submitted by the Author:   | 18-May-2021                                                                                                                                                                                                                                                                                                                                                                                                                                                                                                                                                                                                                                                                                                                                                                                                                                                                                                                                                                                                                                                                                                                                                                                                                     |
| Complete List of Authors:       | Ostwal, Vikas; Tata Memorial Centre, Medical Oncology<br>Ramaswamy, Anant; Tata Memorial Centre, Department of medical Oncology<br>Bhargava, Prabhat; Tata Memorial Centre<br>Hatkambkar, Tejaswee; Tata Memorial Centre, Homi Bhabha National Institute, Mumbai, India., Department of medical Oncology<br>Swami, Rohit; Narayana Multi speciality Hospital, Jaipur India. , Medical Oncology<br>Rastogi, Sameer; AIIMS New Delhi, India.<br>Mandavkar, Sarika; Tata Memorial Centre, Homi Bhabha National Institute, Mumbai, India., Department of medical Oncology<br>Ghosh, Jaya; Tata Memorial Centre, Homi Bhabha National Institute, Mumbai, India., Department of medical Oncology<br>Bajpai, Jyoti; Tata Memorial Centre, Homi Bhabha National Institute, Mumbai, India., Department of medical Oncology<br>Gulia, Seema; Tata Memorial Centre, Homi Bhabha National Institute, Mumbai, India., Department of medical Oncology<br>Srinivas, Sujay; Tata Memorial Centre, Homi Bhabha National Institute, Mumbai, India., Department of medical Oncology<br>Rath, Sushmita; Tata Memorial Centre<br>Gupta, Sudeep; Tata Memorial Centre, Homi Bhabha National Institute, Mumbai, India., Department of medical Oncology |
| <b>Primary Subject Heading</b>: | Geriatric medicine                                                                                                                                                                                                                                                                                                                                                                                                                                                                                                                                                                                                                                                                                                                                                                                                                                                                                                                                                                                                                                                                                                                                                                                                              |
| Secondary Subject Heading:      | Oncology, Pharmacology and therapeutics, Medical management, Geriatric medicine, Health services research                                                                                                                                                                                                                                                                                                                                                                                                                                                                                                                                                                                                                                                                                                                                                                                                                                                                                                                                                                                                                                                                                                                       |
| Keywords:                       | CHEMOTHERAPY, Adult oncology < ONCOLOGY, Gynaecological oncology < ONCOLOGY, Gastrointestinal tumours < ONCOLOGY, Breast tumours < ONCOLOGY, Adverse events < THERAPEUTICS                                                                                                                                                                                                                                                                                                                                                                                                                                                                                                                                                                                                                                                                                                                                                                                                                                                                                                                                                                                                                                                      |
|                                 |                                                                                                                                                                                                                                                                                                                                                                                                                                                                                                                                                                                                                                                                                                                                                                                                                                                                                                                                                                                                                                                                                                                                                                                                                                 |

SCHOLARONE™  
Manuscripts

1  
2  
3  
4  
5  
6  
7  
8  
9  
10  
11  
12  
13  
14  
15  
16  
17  
18  
19  
20  
21  
22  
23  
24  
25  
26  
27  
28  
29  
30  
31  
32  
33  
34  
35  
36  
37  
38  
39  
40  
41  
42  
43  
44  
45  
46  
47  
48  
49  
50  
51  
52  
53  
54  
55  
56  
57  
58  
59  
60



I, the Submitting Author has the right to grant and does grant on behalf of all authors of the Work (as defined in the below author licence), an exclusive licence and/or a non-exclusive licence for contributions from authors who are: i) UK Crown employees; ii) where BMJ has agreed a CC-BY licence shall apply, and/or iii) in accordance with the terms applicable for US Federal Government officers or employees acting as part of their official duties; on a worldwide, perpetual, irrevocable, royalty-free basis to BMJ Publishing Group Ltd ("BMJ") its licensees and where the relevant Journal is co-owned by BMJ to the co-owners of the Journal, to publish the Work in this journal and any other BMJ products and to exploit all rights, as set out in our [licence](#).

The Submitting Author accepts and understands that any supply made under these terms is made by BMJ to the Submitting Author unless you are acting as an employee on behalf of your employer or a postgraduate student of an affiliated institution which is paying any applicable article publishing charge ("APC") for Open Access articles. Where the Submitting Author wishes to make the Work available on an Open Access basis (and intends to pay the relevant APC), the terms of reuse of such Open Access shall be governed by a Creative Commons licence – details of these licences and which [Creative Commons](#) licence will apply to this Work are set out in our licence referred to above.

Other than as permitted in any relevant BMJ Author's Self Archiving Policies, I confirm this Work has not been accepted for publication elsewhere, is not being considered for publication elsewhere and does not duplicate material already published. I confirm all authors consent to publication of this Work and authorise the granting of this licence.

1  
2  
3  
4  
5  
6  
7  
8  
9  
10  
11  
12  
13  
14  
15  
16  
17  
18  
19  
20  
21  
22  
23  
24  
25  
26  
27  
28  
29  
30  
31  
32  
33  
34  
35  
36  
37  
38  
39  
40  
41  
42  
43  
44  
45  
46  
47  
48  
49  
50  
51  
52  
53  
54  
55  
56  
57  
58  
59  
60

# Title – Cancer Ageing Research Group (CARG) score in older adults undergoing curative intent chemotherapy: A prospective cohort study

---

## TITLE PAGE

**Running title** –CARG score in older Indian cancer patients undergoing curative-intent chemotherapy

### Authors

1. Dr. Vikas Ostwal

Professor, Department of Medical Oncology,

Tata Memorial Centre, Homi Bhabha National Institute, Mumbai, India.

Email: dr.vikas.ostwal@gmail.com

2. Dr. Anant Ramaswamy

Associate Professor, Department of Medical Oncology,

Tata Memorial Centre, Homi Bhabha National Institute, Mumbai, India.

Email: anantr13@gmail.com

3. Dr Prabhat Bhargava

Assistant Professor, Department of Medical Oncology,

Tata Memorial Centre, Homi Bhabha National Institute, Mumbai, India.

1  
2  
3 Email: [bhargava611@gmail.com](mailto:bhargava611@gmail.com)  
4  
5  
6  
7

8  
9 4. Ms. Tejaswee Hatkhambkar

10  
11 Research coordinator, Department of Medical Oncology,  
12

13  
14 Tata Memorial Centre, Homi Bhabha National Institute, Mumbai, India.  
15

16  
17 Email: [tejasweehatkhambkar@gmail.com](mailto:tejasweehatkhambkar@gmail.com)  
18  
19

20  
21  
22 5. Dr Rohit Swami

23  
24 Assistant Professor, Department of Medical Oncology,  
25

26  
27 Narayana Multi specialty Hospital, Jaipur India.  
28

29  
30 Email: [swamirohit21@yahoo.in](mailto:swamirohit21@yahoo.in)  
31  
32

33  
34  
35 6. Dr Sameer Rastogi

36  
37 Associate Professor, Department of Medical Oncology,  
38

39  
40 AIIMS New Delhi, India.  
41

42  
43 Email: [samdoc\\_mamc@yahoo.com](mailto:samdoc_mamc@yahoo.com)  
44  
45

46  
47  
48 7. Ms. Sarika Mandavkar

49  
50 Research nurse, Department of Medical Oncology,  
51

52  
53 Tata Memorial Centre, Homi Bhabha National Institute, Mumbai, India.  
54

55  
56 Email: [sarikamandavkar1@gmail.com](mailto:sarikamandavkar1@gmail.com)  
57  
58  
59  
60

1  
2  
3  
4  
5  
6 8. Dr. Jaya Ghosh  
7

8  
9 Professor, Department of Medical Oncology,

10  
11 Tata Memorial Centre, Homi Bhabha National Institute, Mumbai, India.  
12

13  
14 Email: [archana\\_jaya\\_ghosh@yahoo.co.in](mailto:archana_jaya_ghosh@yahoo.co.in)  
15  
16  
17  
18  
19

20 9. Dr. Jyoti Bajpai

21  
22 Professor, Department of Medical Oncology,  
23

24  
25 Tata Memorial Centre, Homi Bhabha National Institute, Mumbai, India.  
26  
27

28 Email: [dr\\_jyotibajpai@yahoo.co.in](mailto:dr_jyotibajpai@yahoo.co.in)  
29  
30  
31  
32  
33

34 10. Dr. Seema Gulia

35  
36 Professor, Department of Medical Oncology,  
37

38  
39 Tata Memorial Centre, Homi Bhabha National Institute, Mumbai, India.  
40  
41

42 Email: [drseemagulia@gmail.com](mailto:drseemagulia@gmail.com)  
43  
44  
45  
46  
47

48 11. Dr. Sujay Srinivas

49  
50 Assistant Professor, Department of Medical Oncology,  
51

52  
53 Tata Memorial Centre, Homi Bhabha National Institute, Mumbai, India.  
54  
55

56 Email: [sujay.0541@gmail.com](mailto:sujay.0541@gmail.com)  
57  
58  
59  
60

1  
2  
3 12. Dr Sushmita Rath  
4

5  
6 Assistant Professor, Department of Medical Oncology,  
7

8  
9 Tata Memorial Centre, Homi Bhabha National Institute, Mumbai, India.  
10

11  
12 Email: [sushmitarath73@gmail.com](mailto:sushmitarath73@gmail.com)  
13  
14

15  
16  
17 13. Dr Sudeep Gupta  
18

19  
20 Professor, Department of Medical Oncology,  
21

22  
23 Director ACTREC, Room 309/310, 3rd Floor, Paymaster Shodhika,  
24

25  
26 ACTREC (Advanced Centre for Treatment, Research and Education in Cancer), Homi Bhabha  
27

28  
29 National Institute (HBNI), Navi Mumbai - 410210, Maharashtra, India  
30

31  
32 Email id - [sudeepgupta04@yahoo.com](mailto:sudeepgupta04@yahoo.com)  
33  
34

35  
36 Corresponding author  
37

38  
39 Dr. Anant Ramaswamy  
40

41  
42 Associate Professor, Department of Medical Oncology,  
43

44  
45 Tata Memorial Centre, Homi Bhabha National Institute, Mumbai, India.  
46

47  
48 Email: [anantr13@gmail.com](mailto:anantr13@gmail.com)  
49  
50

51  
52 Funding:  
53

54  
55 Received grants to Tata Memorial centre, Mumbai for the conduct of present study from  
56

- 57  
58 a. Indian Association of Supportive Care in Cancer awarded research award during BEST OF  
59  
60 MASCC 2019. **Grant number: 1716-A**

- 1  
2  
3 b. Intas Pharmaceuticals Private Limited **Grant number: 1716-B – The Pharmaceutical**  
4 **company, Intas Pharmaceutical Private Limited, provided an unrestricted educational**  
5 **grant to Tata Memorial Centre (The Institute) for the conduct of the study. This was**  
6 **utilized for appointing a trained medical doctor for the purpose of the study.**  
7  
8  
9  
10  
11  
12  
13  
14

15 Prior presentation: None

16  
17 Conflict of interest: None

18  
19 Author Contributions:

20  
21  
22  
23 **1. Dr. Vikas Ostwal**

24  
25 Author contribution - Conception and design, analysis and interpretation of data,  
26  
27 drafting of manuscript, Final approval of the submitted version.

28  
29  
30 **2. Dr. Anant Ramaswamy**

31  
32 Author contribution - Conception and design, analysis and interpretation of data,  
33  
34 drafting of manuscript, Final approval of the submitted version.

35  
36  
37 **3. Dr Prabhat Bhargava**

38  
39 Author contribution - analysis and interpretation of data, drafting of manuscript,  
40  
41 Final approval of the submitted version.  
42  
43  
44  
45  
46

47  
48 **4. Ms. Tejaswee Hatkhambkar**

49  
50 Author contribution - analysis and interpretation of data, Final approval of the  
51  
52 submitted version.  
53

54  
55 **5. Dr Rohit Swami**

56  
57 Author contribution - analysis and interpretation of data, drafting of manuscript,  
58  
59 Final approval of the submitted version.  
60



1  
2  
3 6. Dr Sameer Rastogi  
4

5 Author contribution - Conception and design, drafting of manuscript, Final approval  
6 of the submitted version.  
7  
8

9  
10 7. Ms. Sarika Mandavkar  
11

12 Author contribution - analysis and interpretation of data, drafting of manuscript,  
13 Final approval of the submitted version.  
14  
15

16 8. Dr. Jaya Ghosh  
17

18 Author contribution - analysis and interpretation of data, drafting of manuscript,  
19 Final approval of the submitted version.  
20  
21

22 9. Dr Sushmita Rath  
23

24 Author contribution - analysis and interpretation of data, drafting of manuscript,  
25 Final approval of the submitted version.  
26  
27

28 10. Dr. Jyoti Bajpai  
29

30 Author contribution - analysis and interpretation of data, drafting of manuscript,  
31 Final approval of the submitted version.  
32  
33

34 11. Dr. Seema Gulia  
35

36 Author contribution - analysis and interpretation of data, drafting of manuscript,  
37 Final approval of the submitted version.  
38  
39

40 12. Dr Sujay Srinivas  
41

42 Author contribution - analysis and interpretation of data, drafting of manuscript,  
43 Final approval of the submitted version.  
44  
45  
46  
47  
48  
49  
50

1  
2  
3 13. Dr Sudeep Gupta  
4

5 Author contribution - Conception and design, analysis and interpretation of data,  
6  
7 drafting of manuscript, Final approval of the submitted version.  
8  
9

10  
11 Acknowledgements: Nil  
12

13  
14 Clinical trial registration: CTRI/2016/10/007357  
15

16  
17 Ethics committee Clearance:  
18

- 19  
20  
21 1. Name of the Ethics committee: Institutional Ethics committee, Tata Memorial  
22  
23 Centre, Parel, Mumbai.  
24  
25  
26  
27  
28 2. IEC approval ID: IEC/1019/1716/001  
29  
30  
31  
32 3. The participants gave informed consent before taking part in the study.  
33  
34  
35

36  
37 Word count: 3398 (excluding abstract and references)  
38

39  
40 Data Availability statement: Data are available upon reasonable request  
41  
42  
43  
44  
45  
46  
47  
48  
49  
50  
51  
52  
53  
54  
55  
56  
57  
58  
59  
60

**Abstract:**

**Importance:**

The Cancer Aging Research Group (CARG) toxicity score is used to assess toxicity risk in geriatric patients receiving chemotherapy.

**Objective:**

The primary aim was to validate the CARG score in geriatric patients treated with curative intent chemotherapy in predicting Grade 3-5 toxicities.

**Design:**

This was a longitudinal prospective observational study

**Setting:**

Tata Memorial Hospital, Mumbai, India, a tertiary cancer care referral centre.

**Participants:**

Patients age  $\geq 65$  with gastrointestinal, breast or gynaecological stage I-III cancers being planned for curative intent chemotherapy. A total of 270 patients were required for accrual in the study.

**Exposure(s):**

Total risk score ranged from 0 (lowest toxicity risk) to 19 (highest toxicity risk).

**Main Outcome(s) and Measure(s):**

The primary endpoint of the study was to evaluate whether the CARG risk score predicted for grade 3-5 toxicities.

**Results:**

1  
2  
3 The study cohort of 270 patients had a mean age of 69 years (65-83), with the most common  
4 cancers being gastrointestinal (79%). Fifty-two percent of patients had at-least one grade 3-5  
5 toxicity. The risk of toxicity was increased with increasing risk score (42% low, 51%  
6 medium, 79% high risk;  $P < .001$ ). There was no association between either ECOG PS  
7 (p=0.69) or age adjusted Charlson Comorbidity Index (p=0.79) risk categories and grade 3-5  
8 chemotherapy toxicity.  
9  
10  
11  
12  
13  
14  
15  
16

### 17 **Conclusions and Relevance:**

18  
19  
20 The current study validates the CARG risk score in predicting for grade 3-5 toxicities in  
21 geriatric oncology patients receiving curative intent chemotherapy and can be considered as  
22 standard of care before planning chemotherapy in every elderly patient.  
23  
24  
25  
26  
27  
28  
29  
30

31 **Key words** – CARG risk; Hurria score, curative, ECOG PS, Charlson Comorbidity Index,  
32 chemotoxicity  
33  
34  
35  
36  
37  
38  
39  
40  
41  
42  
43  
44  
45  
46  
47  
48  
49  
50  
51  
52  
53  
54  
55  
56  
57  
58  
59  
60

1  
2  
3 **Strengths and limitations of the study:**  
4

- 5
- 6 • The CARG risk score is a simple tool comprising easily available clinical information.
  - 7
  - 8 • This is a prospective study to assess CARG risk score in elderly patients treated with  
9  
10 curative intent to predict for grade 3-5 toxicities.
  - 11
  - 12 • CARG score performed better than traditional indices such as the age adjusted Charlson  
13  
14 Comorbidity Index and ECOG PS.
  - 15
  - 16 • The results suggest that the CARG score is valid in the studied population and can be  
17  
18 routinely used in clinical practice.
  - 19
  - 20 • This study does not include palliative patients and mainly GI cancer patients were  
21  
22 recruited.  
23  
24  
25  
26  
27  
28  
29  
30  
31  
32  
33  
34  
35  
36  
37  
38  
39  
40  
41  
42  
43  
44  
45  
46  
47  
48  
49  
50  
51  
52  
53  
54  
55  
56  
57

58 **Manuscript:**  
59  
60

## Introduction

Older adult patients ( age  $\geq 65$  years) with cancer represent a growing proportion of patients in community clinical practice, primarily due to increasing life-spans as well as medical progress contributing to decreased morbidity and mortality from other causes (1). Elderly patients comprise anywhere between 20% to 60% in community oncology practice, with variances based on access to cancer care, disease stage and centre specific management strategies (2,3).

The age adjusted Charlson Comorbidity Index (ACCI) and ECOG Performance status (PS) amongst others have often been used to quantify risks and predict for outcomes in older adults with cancer, but there is limited data for correlation between these indices and treatment related side effects (4–6). The Cancer Aging Research Group (CARG) risk score, developed by Hurria and colleagues, is an easy-to-use tool that predicts for significant chemotherapy related toxicities (grade 3- grade 5) in older North American adults  $\geq 65$  years starting on chemotherapy (7,8). Based on their training samples and subsequent validation studies, the investigators clearly identified low, mid and high-risk groups predicting for increasing rates of grade 3-5 toxicities (low risk: 30%, intermediate risk: 52%, high risk: 83%) with statistical significance ( $P < 0.001$ ). The CARG risk score has been validated in other countries and in specific tumor sites to varying degrees (9,10).

In older adults being treated with curative intent chemotherapy, there is the possibility of treating oncologists using standard doses to maximize outcomes, despite patient related indicators suggesting a requirement for lower doses. This is a unique scenario where further information on risks and benefits would allow for informed clinical decision making on doses and drugs to be used. As patients with all stages of cancer were included in the CARG studies, the ambiguity with regard to its usage in patients being treated with potentially curative intent lends itself to re-examination.

1  
2  
3 With this background, the investigators conducted a longitudinal prospective study with the  
4 primary aim of validating the CARG risk score in Indian older cancer patients treated with  
5 curative intent chemotherapy (neoadjuvant or/and adjuvant chemotherapy). Secondary and  
6 objectives included correlation of the age adjusted Charlson Comorbidity Index (ACCI) and  
7 physician measured ECOG PS with grade 3-5 toxicities. An exploratory component of the  
8 study involved an estimation of grade 1 and grade 2 toxicities and their correlation with the  
9 CARG risk score.  
10  
11  
12  
13  
14  
15  
16  
17  
18  
19

## 20 **Materials and methods**

### 21 **Patient selection and design**

22  
23  
24 The study was designed as a longitudinal prospective observational study to validate the  
25 CARG risk score in predicting chemotherapy toxicity risk in elderly patients. The study was  
26 conducted at the Tata Memorial Hospital and enrolled consecutive patients aged  $\geq 65$  years,  
27 chemotherapy naïve, with a histological diagnosis of gastrointestinal, breast or gynecological  
28 cancer, stage I-III disease and planned for neoadjuvant or adjuvant systemic chemotherapy as  
29 a potentially curative treatment option.  
30  
31  
32  
33  
34  
35  
36  
37  
38  
39

40  
41 The study was designed by investigators from the Department of Medical Oncology of the Tata  
42 Memorial Hospital and was approved by the ethics committee (IEC/1019/1716/001). The study  
43 was registered at Clinical trial registry of India (CTRI/2016/10/007357). Written informed  
44 consent was obtained from all patients before inclusion in the study.  
45  
46  
47  
48  
49

### 50 **Patient and public involvement:**

51  
52 There was no public or patient involvement in design, conduct or results declaration of the  
53 study.  
54  
55  
56  
57  
58  
59  
60

## Study procedures

Data regarding tumor type and stage, pre-treatment laboratory values, and chemotherapy regimen were recorded. All patients underwent standard pre-chemotherapy work up, including evaluation of end organ function. Patients were planned for chemotherapy by treating oncologist (with an assessment of ECOG PS and ACCI), who was blinded to the risk score. A trained medical doctor calculated the CARG risk score for patients enrolled in the study. The assessment of the score by the trained medical doctor was independently reviewed by an oncologist who was not part of the treating team (7). Total risk score ranged from 0 (lowest toxicity risk) to 19 (highest toxicity risk), with division of the scores into low risk (0-5 points), intermediate risk (6 to 9 points) and high risk (10-19 points) as per the classification in the original study by Hurria et al (7). One modification of the original CARG risk score which was used in the current study was the measurement of 'Walking 1 block'. The concept of measuring distances by a block is not prevalent in India and hence, a distance of 100 meters in the immediate vicinity of the hospital was measured and patients were scored on their ability to walk the same. The chemotherapy dosing for the first cycle of chemotherapy was categorized as 'standard' if 100% doses were planned and 'dose reduced' if any dose below 100% was used. The decision for dose modifications, whether initial or subsequent, was based on assessment by treating oncologist. Besides CARG risk score, the age adjusted Charlson's Comorbidity Index (ACCI) was calculated for all patients as part of standard assessment of older adults with cancer. A cut-off of 4 points ( $\leq 4$  and  $>4$ ) was used to differentiate between low and high CCI scores (11). Patients were followed from beginning till the end of chemotherapy course across all cycles of therapy, though occurrence of a single grade 3-4 toxicity was considered as an endpoint for the purpose of toxicity calculation in the study. Toxicities were captured prospectively at all clinical visits (by treating oncologist and trained medical doctor) and graded as per National Cancer Institute



1  
2  
3 Common Terminology Criteria for Adverse Events (NCI CTCAE), version 4.0. Decision on  
4 relatedness of toxicity to chemotherapy was made by treating physician. Laboratory values  
5 were captured as grade 1 to 5 toxicity if they met the criteria on the date of scheduled  
6 chemotherapy or when patient was seeking attention because of treatment related toxicities.  
7  
8  
9  
10  
11  
12

## 13 Outcomes

14  
15  
16 The primary outcome of the study was the occurrence of any grade 3-5 chemotherapy related  
17 toxicity over the course of planned treatment and its association with the CARG risk score.  
18  
19 The planned secondary endpoints of the study were the correlation of ACCI and ECOG PS  
20 with grade 3-5 chemotherapy related toxicity. Occurrence of any grade 1-2 chemotherapy  
21 related toxicity and its correlation with CARG risk score was an exploratory aspect of the  
22 study.  
23  
24  
25  
26  
27  
28  
29  
30

## 31 Statistical analysis

32  
33  
34  
35 Descriptive analyses were performed to enumerate patient, tumor, treatment characteristics,  
36 CARG risk scores and ACCI. The incidence of grade 3 to grade 5 toxicities were calculated  
37 and compared between CARG risk groups, and ECOG PS cohorts by using the chi-square  
38 test. The CARG risk score is not routinely used in clinical practice in our institution and we  
39 did not have baseline data for the same for the purpose of sample size calculation . We  
40 conducted an internal audit of elderly patients with breast, gastrointestinal and gynecological  
41 cancers receiving curative intent chemotherapy in our hospital and found a 20 % incidence  
42 of grade 3-grade 5 toxicities in elderly patients with ECOG PS 0/1 and controlled or absent  
43 comorbidities (surrogate for “low risk) as opposed to 36% in elderly patients with ECOG PS  
44 2 with or without multiple uncontrolled comorbidities (surrogate for “ high risk”).  
45  
46  
47  
48  
49  
50  
51  
52  
53  
54  
55  
56  
57  
58 Extrapolating these results, a power of 80% and alpha of 5% with 1 sided assumption was  
59  
60

1  
2  
3 required with an estimated sample size required being 246 patients. Assuming an attrition rate  
4  
5 of 10%, a total of 270 patients were required for enrolment in the study. Chi square test was  
6  
7 performed to test the association of the CARG risk score, PS, and ACCI with G 3-5 toxicities  
8  
9 and for association of CARG risk score with grade 1-2 toxicities as well dose modifications.  
10  
11 The predictive ability of the CARG risk score was evaluated by calculating receiver-  
12  
13 operating characteristic (ROC) curves and calculating the area under the curve (also known  
14  
15 as C-statistic). ROC curves were also calculated for ECOG PS and ACCI. All analyses were  
16  
17 performed using SPSS version 25. All tests were two-sided, and a P value of <0.05 was  
18  
19 considered statistically significant.  
20  
21  
22  
23

## 24 25 Results

### 26 27 28 Patient and treatment characteristics

29  
30 The study completed accrual of 270 patients, with mean age of patients being 69 years  
31  
32 (range:65-83), 121 (45%) female patients and 212 patients (79%) having gastrointestinal  
33  
34 cancers. For purposes of comparison, data from the seminal CARG study by Hurria et al is  
35  
36 provided for comparison (table 1). Details of chemotherapeutic regimens are presented in  
37  
38 supplementary table 1.  
39  
40  
41

### 42 43 Chemotherapy toxicity

44  
45 At least one grade 3 to 5 toxicity was seen in 140 patients (52%), with 119 (44%) having  
46  
47 grade 3, 22 (8%) having grade 4, and 11(4%) grade 5 toxicities. Grade 3-5 haematological  
48  
49 and non-haematological toxicities occurred in 60 patients (22%) and 120 (45%) patients  
50  
51 respectively. Common haematological toxicities were neutropenia in 26 (10%) and febrile  
52  
53 neutropenia in 17 (6%) patients, while common non-haematological toxicities were  
54  
55 infections, fatigue and diarrhoea in 54 (20%), 24 (9%) and 23 (9%) patients respectively  
56  
57 (table 2).  
58  
59  
60

1  
2  
3 The incidence of grade 1 to grade 2 toxicities are listed in supplementary table 2.  
4  
5

## 6 Correlation of CARG score with toxicity and dose modifications 7 8

9 The median overall CARG risk score was 6 (range, 0 to 19). Of the 270 patients, 72 (27%),  
10 164 (61%) and 34 (13%) were classified as low, intermediate and high risk, respectively  
11 (table 1). Grade 3-5 toxicities were seen in 30(42%), 83 (51%) and 27 (79%) patients with  
12 low, intermediate and high-risk score. There was a significant difference in toxicity amongst  
13 the risk groups ( $p<0.001$ ) (figure 1 and table 2). The odds of a patient classified as  
14 intermediate risk having a grade 3-5 toxicity as compared to patient with low risk was 1.64  
15 (95% CI: 1.23-2.13), while the odds of a patient classified as high risk having a grade 3-5  
16 toxicity as compared to patient with low risk was 7.58 (95% CI:2.61-21.73). Area under the  
17 ROC curve for the predictive model in the current cohort was 0.63 (95% CI: 0.57-0.7). The  
18 correlation of individual components of the CARG risk score with grade 3-5 toxicities is  
19 enumerated in supplementary table 3.  
20  
21  
22  
23  
24  
25  
26  
27  
28  
29  
30  
31  
32  
33

34  
35 Grade 1-2 toxicities were seen in 61(86%), 144(88%) and 29 (85%) patients with low,  
36 intermediate and high-risk score. There was no significant difference in toxicity amongst the  
37 CARG risk groups ( $p=0.79$ ).  
38  
39  
40  
41  
42

43 The incidence of grade 2 peripheral neuropathy and grade 2 hand-foot-syndrome (HFS) are  
44 separately reported as these are specifically associated with diminished function. The  
45 incidence of grade 2 neuropathy was seen in 5 (7%), 11 (7%) and 2 (6%) patients in the low,  
46 intermediate and high-risk categories, respectively. There was no significant difference in  
47 grade 2 neuropathy amongst the CARG risk groups ( $p=0.97$ ). The incidence of grade 2 HFS  
48 was seen in 5 (7%), 18 (11%) and 2 (6%) patients in the low, intermediate and high-risk  
49 categories, respectively. There was no significant difference in grade 2 HFS amongst the  
50 CARG risk groups ( $p=0.47$ )  
51  
52  
53  
54  
55  
56  
57  
58  
59  
60

1  
2  
3 Upfront dose modifications in chemotherapy regimens were performed in 65 patients (24%).  
4  
5 Subsequent dose reductions were made in 89 patients (33%). On further analysis, these  
6  
7 subsequent dose modifications were made in 18 (25%), 59 (36%) and 12 (35%) patients in  
8  
9 the low, intermediate and high-risk categories, respectively. The differences in proportion of  
10  
11 dose modifications were not statistically significant between the 3 groups ( $p=0.244$ ).  
12  
13  
14

### 15 Association of grade 3-5 toxicity with Age adjusted Charlson 16 Comorbidity Index (ACCI) and ECOG PS 17 18

19  
20 The median ACCI was 5. A  $CCI \leq 4$  was seen in 111 patients (41%), while 159 patients  
21  
22 (59%) had a  $CCI > 4$ . There was no significant difference in toxicities amongst both groups  
23  
24 of patients ( $p=0.7$ ) (figure 1 and table 3). The ROC of the model with CCI (as a continuous  
25  
26 variable) was 0.48 (95% CI: 0.41-0.55), which was lower than the ROC of the CARG risk  
27  
28 score model, 0.63.  
29  
30

31  
32 ECOG PS was 0, 1 and 2 in 9(3%), 221(82%) and 40 (15%) patients, respectively. There was  
33  
34 no significant difference in toxicities amongst both groups of patients ( $p=0.69$ ) (figure 1 and  
35  
36 table 3). The ROC of the model with ECOG PS (as a continuous variable) was 0.52 (95% CI:  
37  
38 0.45-0.59), which was lower than the ROC of the CARG risk score model, 0.63.  
39  
40  
41

### 42 Discussion 43 44 45 46

47 This study validates the CARG risk score in older Indian patients receiving curative-intent  
48  
49 chemotherapy for stage I-III gastrointestinal, breast and gynecological cancers, though the  
50  
51 association between rates of severe chemotherapy toxicity and CARG risk groups as being  
52  
53 discriminatory was modest (AU-ROC 0.63). No association was found between ECOG PS  
54  
55 and burden of comorbidities as measured by the ACCI with severe chemotherapy related  
56  
57 toxicities.  
58  
59  
60

1  
2  
3 There is a significant knowledge gap in terms of how older patients in general and older  
4 patients with cancer fare in the Indian scenario. Limited data suggests no defined care  
5 structure for older patients with cancer in India as well as only low-moderate awareness and  
6 use of geriatric assessment in older patients with cancer (3,12) . Available evidence from  
7 India suggests that 98% of older adult cancer patients have vulnerabilities in at least one  
8 geriatric domain, though the specific vulnerabilities appear to differ from previously  
9 published data (13). Such a high and differential vulnerability profile in these patients  
10 suggests that they may have a different incidence of toxicities with standard chemotherapy  
11 regimens. With such a background, it was essential to evaluate the validity of the CARG risk  
12 score before routine advocacy in older adult patients.  
13  
14  
15  
16  
17  
18  
19  
20  
21  
22  
23  
24  
25  
26

27 There are some important differences between the populations of the current study and the  
28 seminal CARG study. The current study had only patients with stage I-III disease, while the  
29 CARG study had 38% with non-metastatic disease. Other relevant differences between the  
30 cohorts include a younger mean age (69 vs. 73 years), lesser comorbidities (46% with no  
31 comorbidities vs. 10% with no comorbidities), and better performance on a number of  
32 individual variables in the CARG risk score (better hearing, lesser number of falls, better  
33 social activity and effort tolerance). There were also a lower proportion of patients with high-  
34 risk score in the current study (13% vs. 22%). These differences, coupled with lack of  
35 patients with metastatic disease in the study cohort, indicate that patients in the current study  
36 were a well preserved and presumably fitter group of patients with lesser disease burden and  
37 potential for toxicities.  
38  
39  
40  
41  
42  
43  
44  
45  
46  
47  
48  
49  
50  
51  
52

53 Despite the differences in patient cohorts in terms of baseline characteristics, the current  
54 study validated the Cancer Aging Research Group (CARG) risk score in predicting grade 3 to  
55 grade 5 chemotherapy related toxicities. The low, intermediate and high risk CARG groups  
56 predicted for increasing incidences of grade 3-5 toxicities with statistical significance. The  
57  
58  
59  
60

1  
2  
3 odds ratios between individual risk groups for predicting grade 3-5 toxicity was also  
4  
5 statistically significant, highlighting the differential capability of the risk score. An  
6  
7 unanswered component of the CARG risk assessment was whether it correlated with grade 1-  
8  
9 2 toxicities. Previous studies by Moth et al estimating grade 1 and grade 2 toxicities as  
10  
11 toxicity burden have not shown a correlation with the CARG risk score (14). This is possibly  
12  
13 due to the near universal occurrence of such toxicities in patients receiving chemotherapy. A  
14  
15 similar trend was seen in the current study wherein an increasing risk score did not predict for  
16  
17 an increased risk of grade 1-2 toxicities. Additionally, in comparison to the predictive  
18  
19 capacity of the CARG risk score, the Charlson Comorbidity Index and ECOG PS based risk  
20  
21 groups did not predict for incidences of toxicity in the study. These results highlight certain  
22  
23 salient points in the study, Firstly, the CARG risk score can be used with confidence in the  
24  
25 Indian population to predict for grade 3-5 toxicity. The CARG risk score was evaluated only  
26  
27 in a North American elderly adult cohort initially and the current study provides validation  
28  
29 for the score in the Indian context. Secondly, despite being a better-preserved cohort in  
30  
31 comparison to the population in the seminal study as well as having only patients on curative  
32  
33 intent therapy, a high proportion of patients across risk groups developed grade 3-5 toxicity  
34  
35 which may be life-threatening. Thus, it is imperative to carefully assess the trade-off between  
36  
37 objectives such as survival and downstaging versus potentially life-threatening toxicities  
38  
39 while planning curative intent chemotherapy in older adult patients. Thirdly, the area under  
40  
41 the ROC for the current study was 0.63 and is lower in comparison to the original study  
42  
43 (0.72), though very similar to the results of the validation study (0.65) by the CARG group  
44  
45 (8). Though this indicates a modest discriminatory capability for the CARG risk score in the  
46  
47 current study, it is probably also reflective of the true value of the score in prediction of  
48  
49 severe chemotherapy related toxicities. Smaller studies by Australian investigators have also  
50  
51 previously commented on this lack of discriminatory value with the CARG risk score (14).  
52  
53  
54  
55  
56  
57  
58  
59  
60

1  
2  
3 Finally, using a global assessment score such as ECOG PS or only one aspect of an  
4 assessment profile such as comorbidity status (as in the case of ACCI) would not accurately  
5 capture the heterogeneity of the older adult population. This is reflected in the inadequacy of  
6 ECOG PS and ACCI in predicting for toxicities and hence, these indices should only be used  
7 in conjunction with other indices as measures of assessment in older adults with cancer  
8 (15,16).  
9  
10  
11  
12  
13  
14  
15  
16

17 We also attempted to correlate the CARG risk scores with the necessity for further dose  
18 reductions during chemotherapy. There were no statistically significant differences between  
19 the risk groups in terms of requirement for subsequent dose modifications post initiation of  
20 therapy. This can partially be explained by the fact that a high proportion of patients (24%)  
21 underwent initial dose reductions when planned for therapy by the treating physicians who  
22 were blinded to the CARG risk score. Such an upfront dose reduction may have masked any  
23 possible correlation between the risk scores and need for dose modifications during  
24 chemotherapy.  
25  
26  
27  
28  
29  
30  
31  
32  
33  
34  
35  
36

37 Certain strengths of the current study need to be highlighted. The prospective collection of  
38 toxicity data removes any recall bias that may lead to underestimation of the same. The  
39 assessment in patients undergoing curative intent treatment only is novel and lays stress on  
40 the conundrum faced by oncologists when balancing risks and benefits of using potentially  
41 aggressive chemotherapy regimens in the neoadjuvant or adjuvant setting. The results will  
42 allow patients and oncologists to discuss options with evidentiary basis for expected toxicities  
43 when treatment regimens are considered. By validating the CARG risk score in an Indian  
44 population, the study provides further evidence for the use of the score across geographical  
45 regions.  
46  
47  
48  
49  
50  
51  
52  
53  
54  
55  
56  
57  
58  
59  
60

1  
2  
3 There are certain limitations to this study. This is a single centre study and the results may not  
4 be generalizable to practice across India. There is an under-representation of non-  
5 gastrointestinal cancers and this may hamper the generalization of the study results to all  
6 solid tumors. Additionally, other common solid tumors like lung cancers, head and neck  
7 cancers and genitourinary cancers have not been evaluated in this study. The rate of grade 3-5  
8 toxicities was much higher than planned as per baseline statistical considerations – this may  
9 relate to the preponderance of GI cancers in the study population, besides other differences in  
10 baseline characteristics of the patient cohorts as has been previously discussed. Additionally,  
11 while information with regard to correlation of the CARG risk score with grade 1-2 toxicities  
12 has been provided, the relevance of this is limited due to the fact that almost all patients on  
13 systemic therapy develop some grade 1 or 2 toxicity. Again, the CARG score was developed  
14 to predict for grade 3-5 toxicities, not grade 1-2 toxicities and thus, the inability to  
15 differentially predict for Grade 1-2 in the current study is not surprising . We also do not  
16 have information on patient related outcomes in the study.

17  
18  
19  
20  
21  
22  
23  
24  
25  
26  
27  
28  
29  
30  
31  
32  
33  
34  
35  
36  
37  
38  
39  
40  
41  
42  
43  
44  
45  
46  
47  
48  
49  
50  
51  
52  
53  
54  
55  
56  
57  
58  
59  
60  
61  
62  
63  
64  
65  
66  
67  
68  
69  
70  
71  
72  
73  
74  
75  
76  
77  
78  
79  
80  
81  
82  
83  
84  
85  
86  
87  
88  
89  
90  
91  
92  
93  
94  
95  
96  
97  
98  
99  
100  
101  
102  
103  
104  
105  
106  
107  
108  
109  
110  
111  
112  
113  
114  
115  
116  
117  
118  
119  
120  
121  
122  
123  
124  
125  
126  
127  
128  
129  
130  
131  
132  
133  
134  
135  
136  
137  
138  
139  
140  
141  
142  
143  
144  
145  
146  
147  
148  
149  
150  
151  
152  
153  
154  
155  
156  
157  
158  
159  
160  
161  
162  
163  
164  
165  
166  
167  
168  
169  
170  
171  
172  
173  
174  
175  
176  
177  
178  
179  
180  
181  
182  
183  
184  
185  
186  
187  
188  
189  
190  
191  
192  
193  
194  
195  
196  
197  
198  
199  
200  
201  
202  
203  
204  
205  
206  
207  
208  
209  
210  
211  
212  
213  
214  
215  
216  
217  
218  
219  
220  
221  
222  
223  
224  
225  
226  
227  
228  
229  
230  
231  
232  
233  
234  
235  
236  
237  
238  
239  
240  
241  
242  
243  
244  
245  
246  
247  
248  
249  
250  
251  
252  
253  
254  
255  
256  
257  
258  
259  
260  
261  
262  
263  
264  
265  
266  
267  
268  
269  
270  
271  
272  
273  
274  
275  
276  
277  
278  
279  
280  
281  
282  
283  
284  
285  
286  
287  
288  
289  
290  
291  
292  
293  
294  
295  
296  
297  
298  
299  
300  
301  
302  
303  
304  
305  
306  
307  
308  
309  
310  
311  
312  
313  
314  
315  
316  
317  
318  
319  
320  
321  
322  
323  
324  
325  
326  
327  
328  
329  
330  
331  
332  
333  
334  
335  
336  
337  
338  
339  
340  
341  
342  
343  
344  
345  
346  
347  
348  
349  
350  
351  
352  
353  
354  
355  
356  
357  
358  
359  
360  
361  
362  
363  
364  
365  
366  
367  
368  
369  
370  
371  
372  
373  
374  
375  
376  
377  
378  
379  
380  
381  
382  
383  
384  
385  
386  
387  
388  
389  
390  
391  
392  
393  
394  
395  
396  
397  
398  
399  
400  
401  
402  
403  
404  
405  
406  
407  
408  
409  
410  
411  
412  
413  
414  
415  
416  
417  
418  
419  
420  
421  
422  
423  
424  
425  
426  
427  
428  
429  
430  
431  
432  
433  
434  
435  
436  
437  
438  
439  
440  
441  
442  
443  
444  
445  
446  
447  
448  
449  
450  
451  
452  
453  
454  
455  
456  
457  
458  
459  
460  
461  
462  
463  
464  
465  
466  
467  
468  
469  
470  
471  
472  
473  
474  
475  
476  
477  
478  
479  
480  
481  
482  
483  
484  
485  
486  
487  
488  
489  
490  
491  
492  
493  
494  
495  
496  
497  
498  
499  
500  
501  
502  
503  
504  
505  
506  
507  
508  
509  
510  
511  
512  
513  
514  
515  
516  
517  
518  
519  
520  
521  
522  
523  
524  
525  
526  
527  
528  
529  
530  
531  
532  
533  
534  
535  
536  
537  
538  
539  
540  
541  
542  
543  
544  
545  
546  
547  
548  
549  
550  
551  
552  
553  
554  
555  
556  
557  
558  
559  
560  
561  
562  
563  
564  
565  
566  
567  
568  
569  
570  
571  
572  
573  
574  
575  
576  
577  
578  
579  
580  
581  
582  
583  
584  
585  
586  
587  
588  
589  
590  
591  
592  
593  
594  
595  
596  
597  
598  
599  
600  
601  
602  
603  
604  
605  
606  
607  
608  
609  
610  
611  
612  
613  
614  
615  
616  
617  
618  
619  
620  
621  
622  
623  
624  
625  
626  
627  
628  
629  
630  
631  
632  
633  
634  
635  
636  
637  
638  
639  
640  
641  
642  
643  
644  
645  
646  
647  
648  
649  
650  
651  
652  
653  
654  
655  
656  
657  
658  
659  
660  
661  
662  
663  
664  
665  
666  
667  
668  
669  
670  
671  
672  
673  
674  
675  
676  
677  
678  
679  
680  
681  
682  
683  
684  
685  
686  
687  
688  
689  
690  
691  
692  
693  
694  
695  
696  
697  
698  
699  
700  
701  
702  
703  
704  
705  
706  
707  
708  
709  
710  
711  
712  
713  
714  
715  
716  
717  
718  
719  
720  
721  
722  
723  
724  
725  
726  
727  
728  
729  
730  
731  
732  
733  
734  
735  
736  
737  
738  
739  
740  
741  
742  
743  
744  
745  
746  
747  
748  
749  
750  
751  
752  
753  
754  
755  
756  
757  
758  
759  
760  
761  
762  
763  
764  
765  
766  
767  
768  
769  
770  
771  
772  
773  
774  
775  
776  
777  
778  
779  
780  
781  
782  
783  
784  
785  
786  
787  
788  
789  
790  
791  
792  
793  
794  
795  
796  
797  
798  
799  
800  
801  
802  
803  
804  
805  
806  
807  
808  
809  
810  
811  
812  
813  
814  
815  
816  
817  
818  
819  
820  
821  
822  
823  
824  
825  
826  
827  
828  
829  
830  
831  
832  
833  
834  
835  
836  
837  
838  
839  
840  
841  
842  
843  
844  
845  
846  
847  
848  
849  
850  
851  
852  
853  
854  
855  
856  
857  
858  
859  
860  
861  
862  
863  
864  
865  
866  
867  
868  
869  
870  
871  
872  
873  
874  
875  
876  
877  
878  
879  
880  
881  
882  
883  
884  
885  
886  
887  
888  
889  
890  
891  
892  
893  
894  
895  
896  
897  
898  
899  
900  
901  
902  
903  
904  
905  
906  
907  
908  
909  
910  
911  
912  
913  
914  
915  
916  
917  
918  
919  
920  
921  
922  
923  
924  
925  
926  
927  
928  
929  
930  
931  
932  
933  
934  
935  
936  
937  
938  
939  
940  
941  
942  
943  
944  
945  
946  
947  
948  
949  
950  
951  
952  
953  
954  
955  
956  
957  
958  
959  
960  
961  
962  
963  
964  
965  
966  
967  
968  
969  
970  
971  
972  
973  
974  
975  
976  
977  
978  
979  
980  
981  
982  
983  
984  
985  
986  
987  
988  
989  
990  
991  
992  
993  
994  
995  
996  
997  
998  
999  
1000

Going forward, future directions with regard to the CARG risk assessment include developing paradigms for the degree of dose modifications required in patients based on the score. Patients preferences with regard to tumor related endpoints versus toxicity limiting QOL based on toxicity risk assessment can be explored in trials, especially in the advanced cancer setting. Non-chemotherapeutic systemic treatment options like targeted therapy and immunotherapy can be assessed by the risk score for predicting toxicity. Based on the current study, we plan to use the CARG score routinely in our hospital as well plan prospective studies utilizing the score to estimate dose modifications in relation to risk assessment by the score.

In conclusion, the current study validates the CARG risk score in predicting for grade 3-5 toxicities in Indian older adult cancer patients receiving curative intent chemotherapy. The



score contributes to informed clinical decision making with regard to planning treatment and expectation of toxicity in this cohort of patients. Additionally, indices such as ECOG PS and Charlson Comorbidity Index are inadequate to predict for toxicities and should only be used along with other measures to predict for chemotherapy related toxicities.

### References :

1. Marosi C, Köller M. Challenge of cancer in the elderly. *ESMO Open*. 2016 Apr 1;1(3): e000020.
2. Jemal A, Siegel R, Xu J, Ward E. Cancer statistics, 2010. *CA Cancer J Clin*. 2010 Oct;60(5):277–300.
3. Patil VM, Chakraborty S, Dessai S, Kumar SS, Ratheesan K, Bindu T, et al. Patterns of care in geriatric cancer patients – An audit from a rural based hospital cancer registry in Kerala. *Indian J Cancer*. 2015 Jan 1;52(1):157.
4. Zhao L, Leung L-H, Wang J, Li H, Che J, Liu L, et al. Association between Charlson comorbidity index score and outcome in patients with stage IIIB-IV non-small cell lung cancer. *BMC Pulm Med* [Internet]. 2017 Aug 15 [cited 2020 Jun 17];17. Available from: <https://www.ncbi.nlm.nih.gov/pmc/articles/PMC5556668/>
5. Edahyr B, Lind M, Karsera L, Mafi R, Wallace K, Howell G, et al. PUB068 The Applicability of Comorbidity Indices in Predicting Chemo toxicity in Non-Small Cell Lung Cancer. *J Thorac Oncol*. 2017 Jan 1;12(1): S1487–8.
6. van Abbema DL, van den Akker M, Janssen-Heijnen ML, van den Bergmortel F, Hoeben A, de Vos-Geelen J, et al. Patient- and tumor-related predictors of chemotherapy intolerance in older patients with cancer: A systematic review. *J Geriatr Oncol*. 2019 Jan 1;10(1):31–41.

- 1  
2  
3 7. Hurria A, Togawa K, Mohile SG, Owusu C, Klepin HD, Gross CP, et al. Predicting  
4  
5  
6  
7  
8  
9  
10  
11  
12  
13  
14  
15  
16  
17  
18  
19  
20  
21  
22  
23  
24  
25  
26  
27  
28  
29  
30  
31  
32  
33  
34  
35  
36  
37  
38  
39  
40  
41  
42  
43  
44  
45  
46  
47  
48  
49  
50  
51  
52  
53  
54  
55  
56  
57  
58  
59  
60  
11.5 Chemotherapy Toxicity in Older Adults With Cancer: A Prospective Multicenter Study. *J Clin Oncol*. 2011 Sep 1;29(25):3457–65.
8. Hurria A, Mohile S, Gajra A, Klepin H, Muss H, Chapman A, et al. Validation of a Prediction Tool for Chemotherapy Toxicity in Older Adults With Cancer. *J Clin Oncol*. 2016 May 16;34(20):2366–71.
9. Nie X, Liu D, Li Q, Bai C. Predicting chemotherapy toxicity in older adults with lung cancer. *J Geriatr Oncol*. 2013 Oct 1;4(4):334–9.
10. Alibhai SMH, Aziz S, Manokumar T, Timilshina N, Breunis H. A comparison of the CARG tool, the VES-13, and oncologist judgment in predicting grade 3+ toxicities in men undergoing chemotherapy for metastatic prostate cancer. *J Geriatr Oncol*. 2017;8(1):31–6.
11. Yang C-C, Fong Y, Lin L-C, Que J, Ting W-C, Chang C-L, et al. The age-adjusted Charlson comorbidity index is a better predictor of survival in operated lung cancer patients than the Charlson and Elixhauser comorbidity indices. *Eur J Cardiothorac Surg*. 2018 Jan 1;53(1):235–40.
12. Noronha V, Talreja V, Joshi A, Patil V, Prabhash K. Survey for geriatric assessment in practicing oncologists in India. *Cancer Res Stat Treat*. 2019 Jul 1;2(2):232.
13. Noronha V, Ramaswamy A, Dhekle R, Talreja V, Gota V, Gawit K, et al. Initial experience of a geriatric oncology clinic in a tertiary cancer center in India. *Cancer Res Stat Treat*. 2020 Jul 1;3(2):208.
14. Moth EB, Kiely BE, Stefanic N, Naganathan V, Martin A, Grimison P, et al. Predicting chemotherapy toxicity in older adults: Comparing the predictive value of the

CARG Toxicity Score with oncologists' estimates of toxicity based on clinical judgement. *J Geriatr Oncol.* 2019;10(2):202–9.

15. Extermann M, Boler I, Reich RR, Lyman GH, Brown RH, DeFelice J, et al. Predicting the risk of chemotherapy toxicity in older patients: The Chemotherapy Risk Assessment Scale for High-Age Patients (CRASH) score. *Cancer.* 2012;118(13):3377–86.

16. Zhang J, Liao X, Feng J, Yin T, Liang Y. Prospective comparison of the value of CRASH and CARG toxicity scores in predicting chemotherapy toxicity in geriatric oncology. *Oncol Lett.* 2019 Oct 31;18(5):4947–55.

### **Figure legends:**

Figure 1- CARG (A) vs. (B) ACCI vs. (C) ECOG PS predict Grade 3 to 5 toxicity

### **Tables**

Table 1 - Baseline characteristics of patients

| Characteristic            | Current study<br>Number (%)<br>(n=270) | CARG<br>training<br>cohort<br>(n=500) |
|---------------------------|----------------------------------------|---------------------------------------|
| Mean age in years (range) | 69 (65-83)                             | 73 (65-91)                            |
| Gender                    |                                        |                                       |
| • Female                  | 121 (45)                               | 281 (56)                              |
| • Male                    | 149 (55)                               | 219 (44)                              |

|                                                                                                                                                                                                                                                                                                                                                                                                                                                                                                                                                                                                                                               |                                                                                                                                                                   |                                                                                                                                                                           |
|-----------------------------------------------------------------------------------------------------------------------------------------------------------------------------------------------------------------------------------------------------------------------------------------------------------------------------------------------------------------------------------------------------------------------------------------------------------------------------------------------------------------------------------------------------------------------------------------------------------------------------------------------|-------------------------------------------------------------------------------------------------------------------------------------------------------------------|---------------------------------------------------------------------------------------------------------------------------------------------------------------------------|
| Comorbidities                                                                                                                                                                                                                                                                                                                                                                                                                                                                                                                                                                                                                                 |                                                                                                                                                                   |                                                                                                                                                                           |
| <ul style="list-style-type: none"> <li>Hypertension</li> <li>Diabetes mellitus</li> <li>Coronary artery disease</li> <li>Chronic kidney disease</li> </ul>                                                                                                                                                                                                                                                                                                                                                                                                                                                                                    | <p>114 (42)</p> <p>71 (26)</p> <p>12 (4)</p> <p>3 (1)</p>                                                                                                         | <p>52%</p> <p>-</p> <p>20%</p> <p>-</p>                                                                                                                                   |
| Number of comorbidities                                                                                                                                                                                                                                                                                                                                                                                                                                                                                                                                                                                                                       |                                                                                                                                                                   |                                                                                                                                                                           |
| <ul style="list-style-type: none"> <li>0</li> <li>1</li> <li>&gt;=2</li> </ul>                                                                                                                                                                                                                                                                                                                                                                                                                                                                                                                                                                | <p>125 (46)</p> <p>95 (35)</p> <p>50 (19)</p>                                                                                                                     | <p>10%</p> <p>-</p> <p>-</p>                                                                                                                                              |
| Cancer stage                                                                                                                                                                                                                                                                                                                                                                                                                                                                                                                                                                                                                                  |                                                                                                                                                                   |                                                                                                                                                                           |
| <ul style="list-style-type: none"> <li>Stage I-III</li> </ul>                                                                                                                                                                                                                                                                                                                                                                                                                                                                                                                                                                                 | 270 (100)                                                                                                                                                         | 191 (38)                                                                                                                                                                  |
| Undergone resection                                                                                                                                                                                                                                                                                                                                                                                                                                                                                                                                                                                                                           | 210 (78)                                                                                                                                                          | -                                                                                                                                                                         |
| ECOG performance status (clinician assessed)                                                                                                                                                                                                                                                                                                                                                                                                                                                                                                                                                                                                  |                                                                                                                                                                   |                                                                                                                                                                           |
| <ul style="list-style-type: none"> <li>0/1</li> <li>2</li> </ul>                                                                                                                                                                                                                                                                                                                                                                                                                                                                                                                                                                              | <p>230 (85)</p> <p>40 (15)</p>                                                                                                                                    | <p>402 (80) *</p> <p>86 (17) **</p>                                                                                                                                       |
| Factors assessed in CARG                                                                                                                                                                                                                                                                                                                                                                                                                                                                                                                                                                                                                      |                                                                                                                                                                   |                                                                                                                                                                           |
| <ul style="list-style-type: none"> <li>Age <math>\geq</math> 72 years</li> <li>Cancer type GI or GU</li> <li>Chemotherapy dosing, standard dose</li> <li>No. of chemotherapy drugs, polychemotherapy</li> <li>Hemoglobin &lt; 11 g/dL (male), &lt; 10 g/dL (female)</li> <li>Creatinine clearance &lt; 34 mL/min</li> <li>Hearing, fair or worse</li> <li>No. of falls in last 6 months, 1 or more</li> <li>IADL: Taking medications, with some help/unable</li> <li>MOS: Walking 1 block, somewhat limited/limited a lot</li> <li>MOS: Decreased social activity because of physical/emotional health, limited at least sometimes</li> </ul> | <p>60 (22)</p> <p>212 (79)</p> <p>205 (76)</p> <p>194 (72)</p> <p>99 (37)</p> <p>5 (2)</p> <p>19 (7)</p> <p>18 (7)</p> <p>29 (11)</p> <p>17 (6)</p> <p>18 (7)</p> | <p>270 (54)</p> <p>185 (37)</p> <p>380 (76)</p> <p>351 (70)</p> <p>62 (12)</p> <p>44 (9)</p> <p>123 (25)</p> <p>91 (18)</p> <p>39 (8)</p> <p>109 (22)</p> <p>218 (44)</p> |
| Median overall risk score                                                                                                                                                                                                                                                                                                                                                                                                                                                                                                                                                                                                                     | 6                                                                                                                                                                 | 7                                                                                                                                                                         |
| Risk stratification                                                                                                                                                                                                                                                                                                                                                                                                                                                                                                                                                                                                                           |                                                                                                                                                                   |                                                                                                                                                                           |
| <ul style="list-style-type: none"> <li>Low risk (0-5 points)</li> <li>Intermediate risk (6-9 points)</li> <li>High risk (10-19 points)</li> </ul>                                                                                                                                                                                                                                                                                                                                                                                                                                                                                             | <p>72 (27)</p> <p>164 (61)</p> <p>34 (13)</p>                                                                                                                     | <p>128 (26)</p> <p>227 (45)</p> <p>109 (22)</p>                                                                                                                           |
| Age adjusted Charlson's Comorbidity Index                                                                                                                                                                                                                                                                                                                                                                                                                                                                                                                                                                                                     |                                                                                                                                                                   |                                                                                                                                                                           |
| <ul style="list-style-type: none"> <li><math>\leq</math>4</li> <li>&gt;4</li> </ul>                                                                                                                                                                                                                                                                                                                                                                                                                                                                                                                                                           | <p>111(41)</p> <p>159(59)</p>                                                                                                                                     | <p>-</p> <p>-</p>                                                                                                                                                         |

\*equivalent to KPS $\geq$ 80; \*\* equivalent to KPS 60-70

Table 2 – Treatment related Grade 3 – grade 5 toxicities

| Toxicity type             | Grade 3 (%) | Grade 4 (%) | Grade 5 (%) |
|---------------------------|-------------|-------------|-------------|
| Haematological            |             |             |             |
| Anemia                    | 14 (5)      | 0           | 0           |
| Neutropenia               | 18 (7)      | 8(3)        | 0           |
| Thrombocytopenia          | 6 (2)       | 1 (0.4)     | 0           |
| Febrile neutropenia       | 12 (4)      | 2 (0.7)     | 3(1)        |
| Cumulative haematological | 46 (17)     | 11 (4)      | 3(1)        |
| Non-haematological        |             |             |             |
| Diarrhoea                 | 16 (6)      | 4 (2)       | 3(1) *      |
| Vomiting                  | 12 (4)      | 1(0.4)      | 1(0.3) **   |
| Mucositis                 | 10 (4)      | 0           |             |
| Constipation              | 1 (0.4)     | 0           |             |
| Hand-foot-syndrome        | 1 (0.4)     | -           |             |

|                               |         |         |       |
|-------------------------------|---------|---------|-------|
| Neuropathy                    | 3 (1)   | -       |       |
| Infection with normal ANC     | 47 (17) | 7(3)    |       |
| Hyponatremia                  | 8 (3)   | 2 (0.7) |       |
| Fatigue                       | 24 (9)  | -       |       |
| Sudden cardiac death          |         |         | 4(1)  |
| Cumulative non-haematological | 99(37)  | 13(5)   | 8(3)  |
| Cumulative (all toxicities)   | 119(44) | 22(8)   | 11(4) |

\*All 3 patients developed dehydration with resulting acute renal failure. \*\*Patient developed grade 4 vomiting with irreversible grade 4 hyponatremia resulting in death

Table 3 - Ability of CARG Risk Score Versus Physician assessed ECOG PS Versus Age adjusted Charlson's Comorbidity Index (ACCI) to Predict Grade 3-5 Chemotherapy Toxicity

| Risk Stratification        | No toxicity |    | Toxicity |    | p value |
|----------------------------|-------------|----|----------|----|---------|
|                            | Number      | %  | Number   | %  |         |
| CARG risk score            |             |    |          |    | 0.001   |
| • Low                      | 42          | 58 | 30       | 42 |         |
| • Intermediate             | 81          | 49 | 83       | 51 |         |
| • High                     | 7           | 21 | 27       | 79 |         |
| Physician assessed ECOG PS |             |    |          |    | 0.69    |
| • 0                        | 5           | 56 | 4        | 44 |         |
| • 1                        | 108         | 49 | 113      | 51 |         |
| • 2                        | 17          | 43 | 23       | 57 |         |

|                                           |    |    |    |    |     |
|-------------------------------------------|----|----|----|----|-----|
| Age adjusted Charlson's Comorbidity Index |    |    |    |    |     |
| • ≤4                                      | 55 | 50 | 56 | 50 | 0.7 |
| • >4                                      | 75 | 47 | 84 | 53 |     |

For peer review only

Figure 1 – Ability of CARG risk score (A) versus (B) Age adjusted Charlson Comorbidity Index (ACCI) versus (C) ECOG Performance Status Index to predict Grade 3 to 5 chemotherapy toxicity.





Supplementary table 1 – Details of chemotherapy

| Chemotherapy regimens                                | Number (percentage) |
|------------------------------------------------------|---------------------|
| <b>Platinum containing regimens</b>                  | <b>159(59)</b>      |
| Oxaliplatin containing regimens                      | 123 (46)            |
| • Docetaxel-Oxaliplatin- 5 -fluorouracil             | 50 (19)             |
| • Capecitabine-Oxaliplatin                           | 26 (10)             |
| • 5-fluorouracil - leucovorin-oxaliplatin            | 33 (12)             |
| • 5-fluorouracil - leucovorin-oxaliplatin-irinotecan | 1 (0.4)             |
| • Epirubicin- Capecitabine-Oxaliplatin               | 10 (4)              |
| • Gemcitabine-Oxaliplatin                            | 2 (1)               |
| • Epirubicin- Oxaliplatin - 5-fluorouracil           | 1 (0.4)             |
| Cisplatin containing regimens                        | 19(7)               |
| • Gemcitabine-Cisplatin                              | 19 (7)              |
| Carboplatin containing regimens                      | 17 (6)              |
| • Paclitaxel- Carboplatin                            | 6 (2)               |
| • Carboplatin monotherapy                            | 11 (4)              |
| <b>Non-Platinum containing regimens</b>              | <b>111(41)</b>      |
| • Epirubicin – Cyclophosphamide                      | 9 (3)               |
| • Adriamycin – Cyclophosphamide                      | 19 (7)              |
| • Docetaxel – Cyclophosphamide                       | 1 (0.4)             |
| • Cyclophosphamide-methotrexate – 5-fluorouracil     | 1 (0.4)             |
| • 5-fluorouracil/leucovorin monotherapy              | 10 (4)              |
| • Capecitabine monotherapy                           | 25 (9)              |
| • Gemcitabine monotherapy                            | 26 (10)             |
| • Paclitaxel - Trastuzumab                           | 9 (3)               |
| • Paclitaxel monotherapy                             | 3 (1)               |
| • Docetaxel - 5-fluorouracil                         | 5 (2)               |
| • Gemcitabine- nab-Paclitaxel                        | 2 (1)               |
| • Gemcitabine Capecitabine                           | 1 (0.4)             |
| Chemotherapy timing                                  |                     |
| • Neoadjuvant                                        | 5 (2)               |

1  
2  
3  
4  
5  
6  
7  
8  
9  
10  
11  
12  
13  
14  
15  
16  
17  
18  
19  
20  
21  
22  
23  
24  
25  
26  
27  
28  
29  
30  
31  
32  
33  
34  
35  
36  
37  
38  
39  
40  
41  
42  
43  
44  
45  
46  
47  
48  
49  
50  
51  
52  
53  
54  
55  
56  
57  
58  
59  
60

|                                            |          |
|--------------------------------------------|----------|
| • Adjuvant                                 | 178 (66) |
| • Perioperative (neoadjuvant and adjuvant) | 87 (32)  |

Supplementary table 2 – Treatment- related Grade 1 – grade 2 toxicities

| Toxicity type                | Grade 1/2 toxicities (%) |
|------------------------------|--------------------------|
| Hematological                |                          |
| Anemia                       | 148(55)                  |
| Neutropenia                  | 52(19)                   |
| Cumulative hematological     | 160(59)                  |
| Non-hematological            |                          |
| Diarrhoea                    | 131(49)                  |
| Vomiting                     | 140(52)                  |
| Mucositis                    | 57(21)                   |
| Constipation                 | 41(15)                   |
| Hand-foot-syndrome           | 59(22)                   |
| Neuropathy                   | 75(28)                   |
| Hyponatremia                 | 17(6)                    |
| Fatigue                      | 197(73)                  |
| Cumulative non-hematological | 230(85)                  |
| Cumulative (all toxicities)  | 234(87)                  |

Supplementary table 3 - Ability of individual factors in the CARG risk score to predict for Grade 3 to 5 toxicities

| Risk factor                                                                                     | Prevalence |    | Toxicity |    | p value | OR (95% CI)       |
|-------------------------------------------------------------------------------------------------|------------|----|----------|----|---------|-------------------|
|                                                                                                 | Number     | %  | Number   | %  |         |                   |
| Age $\geq$ 72 years                                                                             | 60         | 22 | 34       | 57 | 0.4     | 1.28 (0.72-2.29)  |
| Cancer type (GI or GU)                                                                          | 212        | 79 | 116      | 55 | 0.07    | 1.71 (0.95-3.08)  |
| Chemotherapy dosing, standard dose                                                              | 201        | 74 | 101      | 50 | 0.37    | 0.77 (0.45-1.35)  |
| Polychemotherapy                                                                                | 194        | 72 | 106      | 55 | 0.14    | 1.48 (0.87-2.54)  |
| Hemoglobin $<$ 11 gm% (male), $<$ 10 gm% (female)                                               | 99         | 37 | 65       | 66 | 0.001   | 2.45(1.47-4.09)   |
| Creatinine clearance $<$ 34ml/min                                                               | 5          | 2  | 3        | 60 | 0.71    | 1.4(0.23-8.52)    |
| Hearing, fair or worse                                                                          | 19         | 7  | 10       | 53 | 0.94    | 1.03(0.41-2.63)   |
| No. of falls in last 6 months, $\geq$ 1                                                         | 18         | 7  | 10       | 56 | 0.75    | 1.17(0.45-3.07)   |
| IADL, taking medications, with some help/unable                                                 | 29         | 11 | 17       | 59 | 0.44    | 1.336 (0.62-2.97) |
| MOS, walking 1 block equivalent, somewhat limited/limited a lot                                 | 17         | 6  | 11       | 65 | 0.27    | 1.76 (0.63-4.91)  |
| MOS, decreased social activity because of physical/emotional health, limited at least sometimes | 18         | 7  | 12       | 67 | 0.19    | 1.94(0.71-5.32)   |

**STROBE 2007 (v4) Statement—Checklist of items that should be included in reports of *cohort studies***

| Section/Topic                | Item # | Recommendation                                                                                                                                                                       | Reported on page # |
|------------------------------|--------|--------------------------------------------------------------------------------------------------------------------------------------------------------------------------------------|--------------------|
| <b>Title and abstract</b>    | 1      | (a) Indicate the study's design with a commonly used term in the title or the abstract                                                                                               | 1                  |
|                              |        | (b) Provide in the abstract an informative and balanced summary of what was done and what was found                                                                                  | 6                  |
| <b>Introduction</b>          |        |                                                                                                                                                                                      |                    |
| Background/rationale         | 2      | Explain the scientific background and rationale for the investigation being reported                                                                                                 | 9                  |
| Objectives                   | 3      | State specific objectives, including any prespecified hypotheses                                                                                                                     | 10                 |
| <b>Methods</b>               |        |                                                                                                                                                                                      |                    |
| Study design                 | 4      | Present key elements of study design early in the paper                                                                                                                              | 10                 |
| Setting                      | 5      | Describe the setting, locations, and relevant dates, including periods of recruitment, exposure, follow-up, and data collection                                                      | 10                 |
| Participants                 | 6      | (a) Give the eligibility criteria, and the sources and methods of selection of participants. Describe methods of follow-up                                                           | 10                 |
|                              |        | (b) For matched studies, give matching criteria and number of exposed and unexposed                                                                                                  | 10                 |
| Variables                    | 7      | Clearly define all outcomes, exposures, predictors, potential confounders, and effect modifiers. Give diagnostic criteria, if applicable                                             | 11                 |
| Data sources/<br>measurement | 8*     | For each variable of interest, give sources of data and details of methods of assessment (measurement). Describe comparability of assessment methods if there is more than one group | 11                 |
| Bias                         | 9      | Describe any efforts to address potential sources of bias                                                                                                                            | 12                 |
| Study size                   | 10     | Explain how the study size was arrived at                                                                                                                                            | 12                 |
| Quantitative variables       | 11     | Explain how quantitative variables were handled in the analyses. If applicable, describe which groupings were chosen and why                                                         | 12                 |
| Statistical methods          | 12     | (a) Describe all statistical methods, including those used to control for confounding                                                                                                | 12                 |
|                              |        | (b) Describe any methods used to examine subgroups and interactions                                                                                                                  | 12                 |
|                              |        | (c) Explain how missing data were addressed                                                                                                                                          | 12                 |
|                              |        | (d) If applicable, explain how loss to follow-up was addressed                                                                                                                       |                    |
|                              |        | (e) Describe any sensitivity analyses                                                                                                                                                |                    |
| <b>Results</b>               |        |                                                                                                                                                                                      | 13                 |

|                          |     |                                                                                                                                                                                                              |    |
|--------------------------|-----|--------------------------------------------------------------------------------------------------------------------------------------------------------------------------------------------------------------|----|
| Participants             | 13* | (a) Report numbers of individuals at each stage of study—eg numbers potentially eligible, examined for eligibility, confirmed eligible, included in the study, completing follow-up, and analysed            | 13 |
|                          |     | (b) Give reasons for non-participation at each stage                                                                                                                                                         | 13 |
|                          |     | (c) Consider use of a flow diagram                                                                                                                                                                           |    |
| Descriptive data         | 14* | (a) Give characteristics of study participants (eg demographic, clinical, social) and information on exposures and potential confounders                                                                     | 13 |
|                          |     | (b) Indicate number of participants with missing data for each variable of interest                                                                                                                          | 13 |
|                          |     | (c) Summarise follow-up time (eg, average and total amount)                                                                                                                                                  | 13 |
| Outcome data             | 15* | Report numbers of outcome events or summary measures over time                                                                                                                                               | 14 |
| Main results             | 16  | (a) Give unadjusted estimates and, if applicable, confounder-adjusted estimates and their precision (eg, 95% confidence interval). Make clear which confounders were adjusted for and why they were included | 14 |
|                          |     | (b) Report category boundaries when continuous variables were categorized                                                                                                                                    |    |
|                          |     | (c) If relevant, consider translating estimates of relative risk into absolute risk for a meaningful time period                                                                                             |    |
| Other analyses           | 17  | Report other analyses done—eg analyses of subgroups and interactions, and sensitivity analyses                                                                                                               | 14 |
| <b>Discussion</b>        |     |                                                                                                                                                                                                              |    |
| Key results              | 18  | Summarise key results with reference to study objectives                                                                                                                                                     | 15 |
| <b>Limitations</b>       |     |                                                                                                                                                                                                              |    |
| Interpretation           | 20  | Give a cautious overall interpretation of results considering objectives, limitations, multiplicity of analyses, results from similar studies, and other relevant evidence                                   | 18 |
| Generalisability         | 21  | Discuss the generalisability (external validity) of the study results                                                                                                                                        | 17 |
| <b>Other information</b> |     |                                                                                                                                                                                                              |    |
| Funding                  | 22  | Give the source of funding and the role of the funders for the present study and, if applicable, for the original study on which the present article is based                                                | 5  |

\*Give information separately for cases and controls in case-control studies and, if applicable, for exposed and unexposed groups in cohort and cross-sectional studies.

**Note:** An Explanation and Elaboration article discusses each checklist item and gives methodological background and published examples of transparent reporting. The STROBE checklist is best used in conjunction with this article (freely available on the Web sites of PLoS Medicine at <http://www.plosmedicine.org/>, Annals of Internal Medicine at <http://www.annals.org/>, and Epidemiology at <http://www.epidem.com/>). Information on the STROBE Initiative is available at [www.strobe-statement.org](http://www.strobe-statement.org).
