# Supplementary material for: Cancer Aging Research Group (CARG) score in older adults undergoing curative intent chemotherapy: a prospective cohort study
Source: PubMed Central journal article supplement — BMJ Open. 2021 Jun 29;11(6):e047376. doi: 10.1136/bmjopen-2020-047376 (PMC8245449; doi:10.1136/bmjopen-2020-047376), 2021-06-29
Supplement: bmjopen-2020-047376supp001.pdf [file bmjopen-2020-047376supp001.pdf]

Supplementary table 1 – Details of chemotherapy

| Chemotherapy regimens                                | Number (percentage) |
|------------------------------------------------------|---------------------|
| <b>Platinum containing regimens</b>                  | <b>159(59)</b>      |
| Oxaliplatin containing regimens                      | 123 (46)            |
| • Docetaxel-Oxaliplatin- 5 -fluorouracil             | 50 (19)             |
| • Capecitabine-Oxaliplatin                           | 26 (10)             |
| • 5-fluorouracil - leucovorin-oxaliplatin            | 33 (12)             |
| • 5-fluorouracil - leucovorin-oxaliplatin-irinotecan | 1 (0.4)             |
| • Epirubicin- Capecitabine-Oxaliplatin               | 10 (4)              |
| • Gemcitabine-Oxaliplatin                            | 2 (1)               |
| • Epirubicin- Oxaliplatin - 5-fluorouracil           | 1 (0.4)             |
| Cisplatin containing regimens                        | 19(7)               |
| • Gemcitabine-Cisplatin                              | 19 (7)              |
| Carboplatin containing regimens                      | 17 (6)              |
| • Paclitaxel- Carboplatin                            | 6 (2)               |
| • Carboplatin monotherapy                            | 11 (4)              |
| <b>Non-Platinum containing regimens</b>              | <b>111(41)</b>      |
| • Epirubicin – Cyclophosphamide                      | 9 (3)               |
| • Adriamycin – Cyclophosphamide                      | 19 (7)              |
| • Docetaxel – Cyclophosphamide                       | 1 (0.4)             |
| • Cyclophosphamide-methotrexate – 5-fluorouracil     | 1 (0.4)             |
| • 5-fluorouracil/leucovorin monotherapy              | 10 (4)              |
| • Capecitabine monotherapy                           | 25 (9)              |
| • Gemcitabine monotherapy                            | 26 (10)             |
| • Paclitaxel - Trastuzumab                           | 9 (3)               |
| • Paclitaxel monotherapy                             | 3 (1)               |
| • Docetaxel - 5-fluorouracil                         | 5 (2)               |
| • Gemcitabine- nab-Paclitaxel                        | 2 (1)               |
| • Gemcitabine Capecitabine                           | 1 (0.4)             |
| Chemotherapy timing                                  |                     |
| • Neoadjuvant                                        | 5 (2)               |

|                                            |          |
|--------------------------------------------|----------|
| • Adjuvant                                 | 178 (66) |
| • Perioperative (neoadjuvant and adjuvant) | 87 (32)  |

Supplementary table 2 – Treatment- related Grade 1 – grade 2 toxicities

| Toxicity type                | Grade 1/2 toxicities (%) |
|------------------------------|--------------------------|
| Hematological                |                          |
| Anemia                       | 148(55)                  |
| Neutropenia                  | 52(19)                   |
| Cumulative hematological     | 160(59)                  |
| Non-hematological            |                          |
| Diarrhoea                    | 131(49)                  |
| Vomiting                     | 140(52)                  |
| Mucositis                    | 57(21)                   |
| Constipation                 | 41(15)                   |
| Hand-foot-syndrome           | 59(22)                   |
| Neuropathy                   | 75(28)                   |
| Hyponatremia                 | 17(6)                    |
| Fatigue                      | 197(73)                  |
| Cumulative non-hematological | 230(85)                  |
| Cumulative (all toxicities)  | 234(87)                  |

Supplementary table 3 - Ability of individual factors in the CARG risk score to predict for Grade 3 to 5 toxicities

| Risk factor                                                                                     | Prevalence |    | Toxicity |    | p value | OR (95% CI)       |
|-------------------------------------------------------------------------------------------------|------------|----|----------|----|---------|-------------------|
|                                                                                                 | Number     | %  | Number   | %  |         |                   |
| Age $\geq$ 72 years                                                                             | 60         | 22 | 34       | 57 | 0.4     | 1.28 (0.72-2.29)  |
| Cancer type (GI or GU)                                                                          | 212        | 79 | 116      | 55 | 0.07    | 1.71 (0.95-3.08)  |
| Chemotherapy dosing, standard dose                                                              | 201        | 74 | 101      | 50 | 0.37    | 0.77 (0.45-1.35)  |
| Polychemotherapy                                                                                | 194        | 72 | 106      | 55 | 0.14    | 1.48 (0.87-2.54)  |
| Hemoglobin $<$ 11gm% (male), $<$ 10gm% (female)                                                 | 99         | 37 | 65       | 66 | 0.001   | 2.45(1.47-4.09)   |
| Creatinine clearance $<$ 34ml/min                                                               | 5          | 2  | 3        | 60 | 0.71    | 1.4(0.23-8.52)    |
| Hearing, fair or worse                                                                          | 19         | 7  | 10       | 53 | 0.94    | 1.03(0.41-2.63)   |
| No. of falls in last 6 months, $\geq$ 1                                                         | 18         | 7  | 10       | 56 | 0.75    | 1.17(0.45-3.07)   |
| IADL, taking medications, with some help/unable                                                 | 29         | 11 | 17       | 59 | 0.44    | 1.336 (0.62-2.97) |
| MOS, walking 1 block equivalent, somewhat limited/limited a lot                                 | 17         | 6  | 11       | 65 | 0.27    | 1.76 (0.63-4.91)  |
| MOS, decreased social activity because of physical/emotional health, limited at least sometimes | 18         | 7  | 12       | 67 | 0.19    | 1.94(0.71-5.32)   |
